# Supplementary material for: Synthesis of microwave-assisted carboxamides in Triton WR-1339-induced hyperlipidemic rats: possible hypolipidemic heterocyclic compounds
Source: Royal Society of Chemistry journal article supplement (doi:10.1039/d3ra03581f), 2023-01-01
Supplement: d3ra03581f1.pdf [file d3ra03581f1.pdf]

## Appendices

### Appendix A

**Table 8. Molecular descriptors of the new novel compounds.** NA: not active or no significant difference. NT: not tested.

| Name | Structural Formula                                                                  | TG/HG %reduction | Chemical Formula                                 | MWt    | Henry's law | tPSA (Å <sup>2</sup> ) | C log P | CMR    | HB donor | HB acceptor |
|------|-------------------------------------------------------------------------------------|------------------|--------------------------------------------------|--------|-------------|------------------------|---------|--------|----------|-------------|
| A5   | 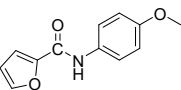   | 86%              | C <sub>12</sub> H <sub>11</sub> NO <sub>3</sub>  | 217.22 | 8.53        | 47.56                  | 1.9014  | 5.8988 | 1        | 4           |
| A7   |    | 84%              | C <sub>9</sub> H <sub>13</sub> NO <sub>2</sub>   | 167.21 | 6.33        | 38.33                  | 1.624   | 4.6259 | 1        | 3           |
| A2   |    | 84%              | C <sub>18</sub> H <sub>13</sub> NO <sub>3</sub>  | 291.31 | 10.75       | 55.4                   | 3.3332  | 8.2926 | 1        | 4           |
| A4   |    | 82%              | C <sub>13</sub> H <sub>11</sub> NO <sub>3</sub>  | 229.24 | 10.04       | 55.4                   | 1.7342  | 6.2452 | 1        | 4           |
| A1   |   | 80%              | C <sub>18</sub> H <sub>13</sub> NO <sub>3</sub>  | 291.31 | 10.75       | 55.4                   | 3.3332  | 8.2926 | 1        | 4           |
| A3   |  | NA               | C <sub>18</sub> H <sub>13</sub> NO <sub>3</sub>  | 291.31 | 10.75       | 55.4                   | 3.7632  | 8.2926 | 1        | 4           |
| A6   |  | NA               | C <sub>11</sub> H <sub>8</sub> ClNO <sub>2</sub> | 221.64 | 7.43        | 38.33                  | 2.7966  | 5.7733 | 1        | 3           |
| A7   |  | 84%              | C <sub>9</sub> H <sub>13</sub> NO <sub>2</sub>   | 167.21 | 6.33        | 38.33                  | 1.624   | 4.6259 | 1        | 3           |

|            |                                                                                     |     |            |        |       |       |             |        |   |   |
|------------|-------------------------------------------------------------------------------------|-----|------------|--------|-------|-------|-------------|--------|---|---|
| <b>A8</b>  | 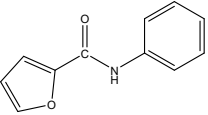   | NA  | C11H9NO2   | 187.20 | 7.3   | 38.33 | 1.826       | 5.2819 | 1 | 3 |
| <b>A9</b>  |    | NA  | C13H13NO4  | 247.25 | 9.76  | 56.79 | 1.9261<br>4 | 6.5157 | 1 | 5 |
| <b>A10</b> |    | 70% | C19H14N2O2 | 302.33 | 13.63 | 58.53 | 3.4492<br>2 | 8.8676 | 1 | 4 |
| <b>A11</b> |    | 95% | C19H14N2O2 | 302.33 | 13.63 | 58.53 | 3.4492<br>2 | 8.8676 | 1 | 4 |
| <b>A12</b> |   | 92% | C14H12N2O2 | 240.26 | 12.92 | 58.53 | 1.8502<br>2 | 6.8202 | 1 | 4 |
| <b>B1</b>  |  | NA  | C18H12O4   | 292.29 | 6.72  | 52.6  | 4.1349      | 8.077  | 0 | 4 |
| <b>B2</b>  |  | NA  | C13H10O4   | 230.22 | 6.02  | 52.6  | 2.5359      | 6.0296 | 0 | 4 |

|            |                                                                                   |     |                                                   |        |       |       |        |        |   |   |
|------------|-----------------------------------------------------------------------------------|-----|---------------------------------------------------|--------|-------|-------|--------|--------|---|---|
| <b>B3</b>  | 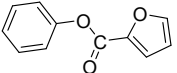 | NT  | C <sub>11</sub> H <sub>8</sub> O <sub>3</sub>     | 188.18 | 3.28  | 35.53 | 2.796  | 5.0663 | 0 | 3 |
| <b>B6</b>  |  | NT  | C <sub>11</sub> H <sub>7</sub> ClO <sub>3</sub>   | 222.62 | 3.41  | 35.53 | 3.649  | 5.5577 | 0 | 3 |
| <b>B4</b>  |  | NT  | C <sub>13</sub> H <sub>12</sub> O <sub>5</sub>    | 248.23 | 5.74  | 53.99 | 2.8771 | 6.3001 | 0 | 5 |
| <b>B7</b>  |  | NT  | C <sub>12</sub> H <sub>10</sub> O <sub>3</sub>    | 202.21 | 3.24  | 35.53 | 3.295  | 5.5301 | 0 | 3 |
| <b>B5</b>  |  | NT  | C <sub>9</sub> H <sub>12</sub> O <sub>3</sub>     | 168.19 | 2.48  | 35.53 | 2.874  | 4.4103 | 0 | 3 |
| <b>BZF</b> |  | 74% | C <sub>19</sub> H <sub>20</sub> ClNO <sub>4</sub> | 361.82 | 13.91 | 75.63 | 3.6982 | 9.6841 | 2 | 5 |

A1

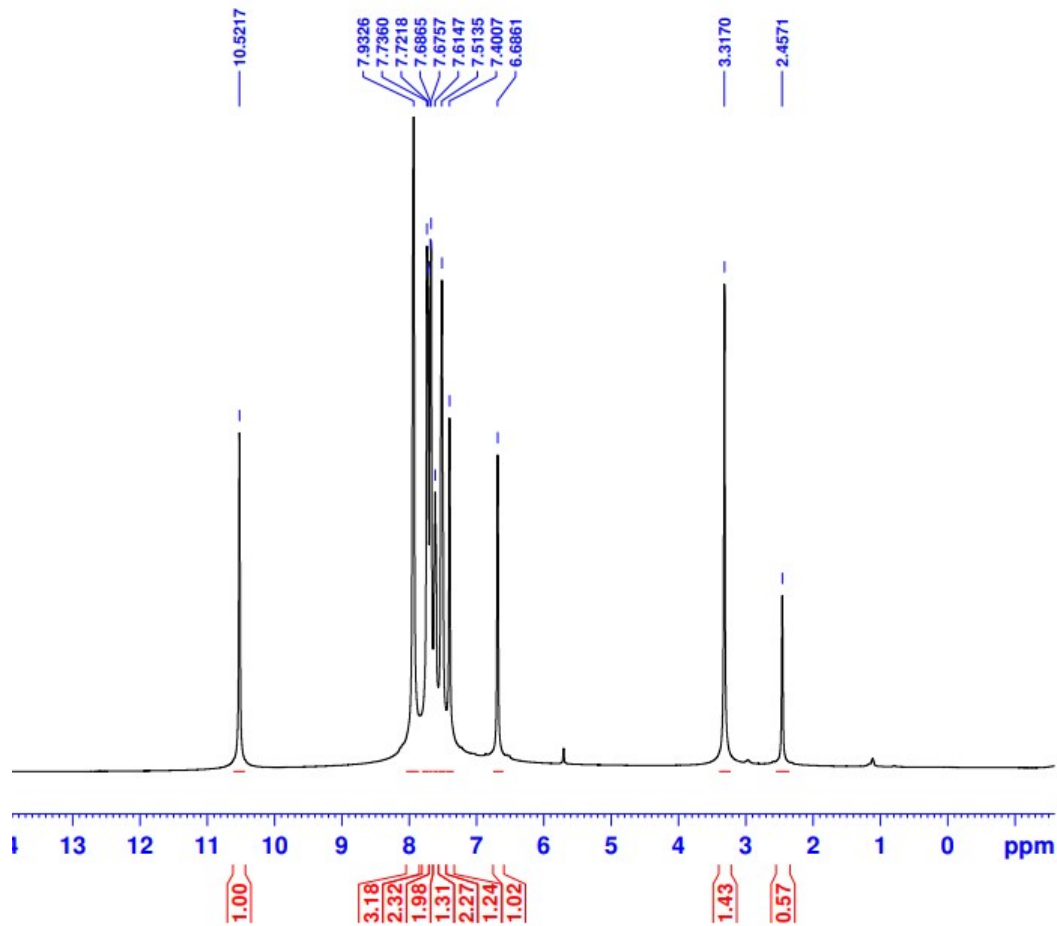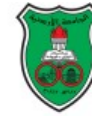

The University of Jordan  
Faculty of Science  
Department of Chemistry

Instrument Model:  
Bruker 500 MHz-Avance III

Operator: Rola Hassouneh  
nmr500@ju.edu.jo

Current Data Parameters  
NAME 18aug15jalal  
EXPNO 191  
PROCNO 1

F2 - Acquisition Parameters  
Date\_ 20180830  
Time 16.25  
INSTRUM spect  
PROBHD 5 mm PABBO BB/  
PULPROG zg  
TD 65536  
SOLVENT DMSO  
NS 37  
DS 0  
SWH 8305.647 Hz  
FIDRES 0.126734 Hz  
AQ 3.9452672 sec  
RG 35.17  
DW 60.200 usec  
DE 6.50 usec  
TE 298.0 K  
D1 2.00000000 sec  
TDO 1

===== CHANNEL f1 =====  
SF01 500.1333839 MHz  
NUC1 1H  
P1 10.60 usec  
PLW1 17.39999962 W

F2 - Processing parameters  
SI 131072  
SF 500.1300270 MHz  
WDW EM  
SSB 0  
LB 1.00 Hz  
GB 0  
PC 0.10

A1

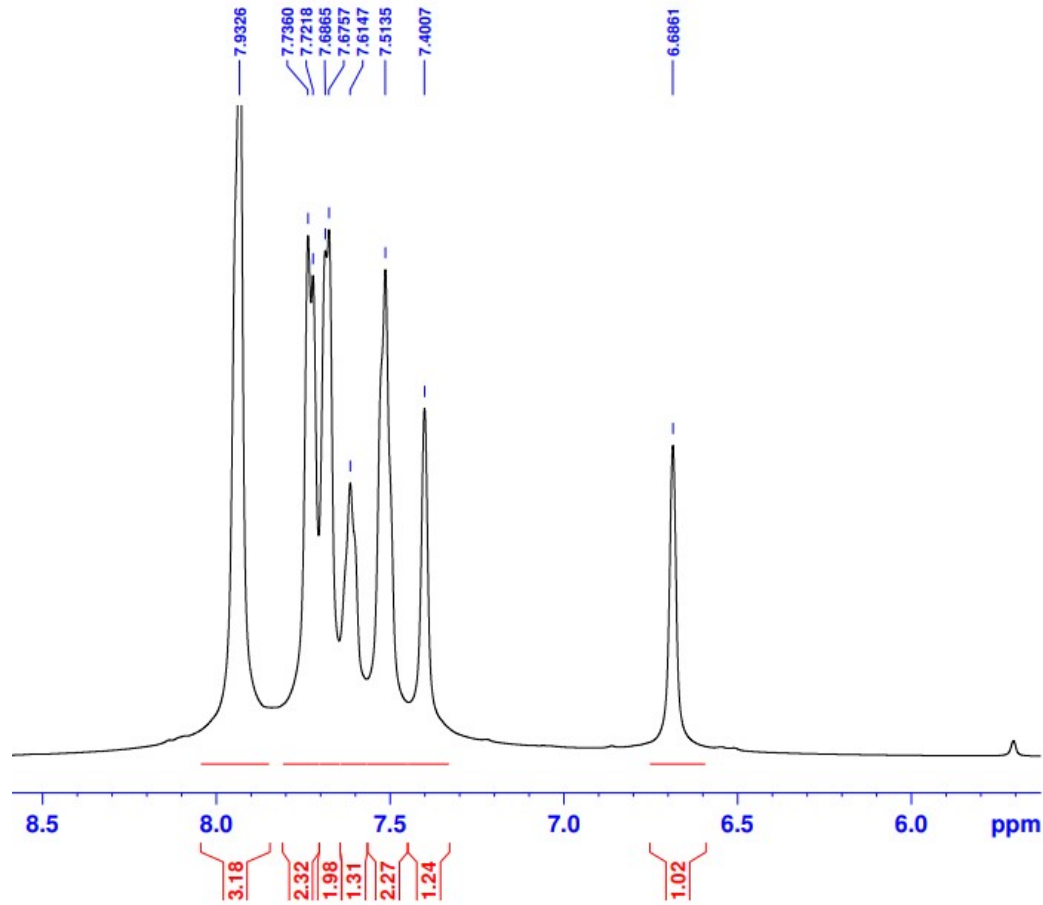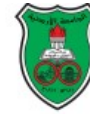

The University of Jordan  
Faculty of Science  
Department of Chemistry

Instrument Model:  
Bruker 500 MHz-Avance III

Operator: Rola Hassouneh  
nmr500@ju.edu.jo

Current Data Parameters  
NAME 18aug15jalal  
EXPNO 191  
PROCNO 1

F2 - Acquisition Parameters  
Date\_ 20180830  
Time 16.25  
INSTRUM spect  
PROBHD 5 mm PABBO BB/  
PULPROG zg  
TD 65536  
SOLVENT DMSO  
NS 37  
DS 0  
SWH 8305.647 Hz  
FIDRES 0.126734 Hz  
AQ 3.9452672 sec  
RG 35.17  
DW 60.200 usec  
DE 6.50 usec  
TE 298.0 K  
D1 2.00000000 sec  
TD0 1

===== CHANNEL f1 =====  
SFO1 500.1333839 MHz  
NUC1 1H  
P1 10.60 usec  
PLW1 17.39999962 W

F2 - Processing parameters  
SI 131072  
SF 500.1300270 MHz  
WDW EM  
SSB 0  
LB 1.00 Hz  
GB 0  
PC 0.10

A1

dept135

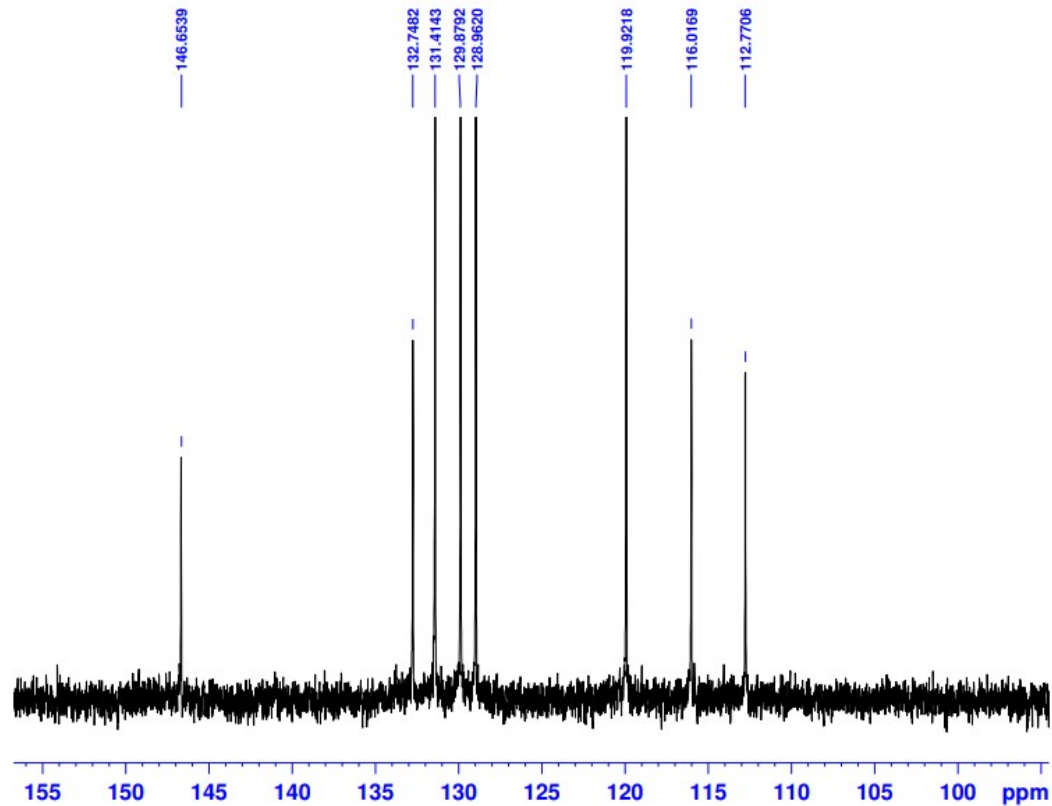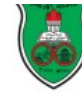

The University of Jordan  
Faculty of Science  
Department of Chemistry

Instrument Model:  
Bruker 500 MHz-Avance III

Operator: Rola Hassouneh  
nmr500@ju.edu.jo

Current Data Parameters  
NAME 18aug15jalal  
EXPNO 133  
PROCNO 1

F2 - Acquisition Parameters  
Date\_ 20180830  
Time 16.36  
INSTRUM spect  
PROBHD 5 mm PABBO BB/  
PULPROG deptap135  
TD 65536  
SOLVENT DMSO  
NS 79  
DS 4  
SWH 28409.092 Hz  
FIDRES 0.433488 Hz  
AQ 1.1534336 sec  
RG 202.06  
DW 17.600 usec  
DE 6.50 usec  
TE 298.0 K  
CNS2 145.0000000  
D1 2.00000000 sec  
D2 0.00344828 sec  
D12 0.0002000 sec  
TDO 1

----- CHANNEL f1 -----  
SF01 125.7688904 MHz  
NUC1 13C  
P1 9.80 usec  
P13 2000.00 usec  
PLW0 0 W  
PLW1 93.32499695 W  
SFXAM[5] Crp60comp.4  
SFOAL5 0.500  
SPOFFS5 0 Hz  
SFXW5 13.69400024 W

----- CHANNEL f2 -----  
SF02 500.1315995 MHz  
NUC2 1H  
CFDPRG[2] waltz16  
F3 11.50 usec  
F4 23.00 usec  
PCPD2 80.00 usec  
PLW2 17.37800026 W  
PLW12 0.36307999 W

F2 - Processing parameters  
SI 32768  
SF 125.7577890 MHz  
NEW EM  
SFB 0  
LB 1.00 Hz  
GB 0  
PC 1.40

A2

F3BP  
NMR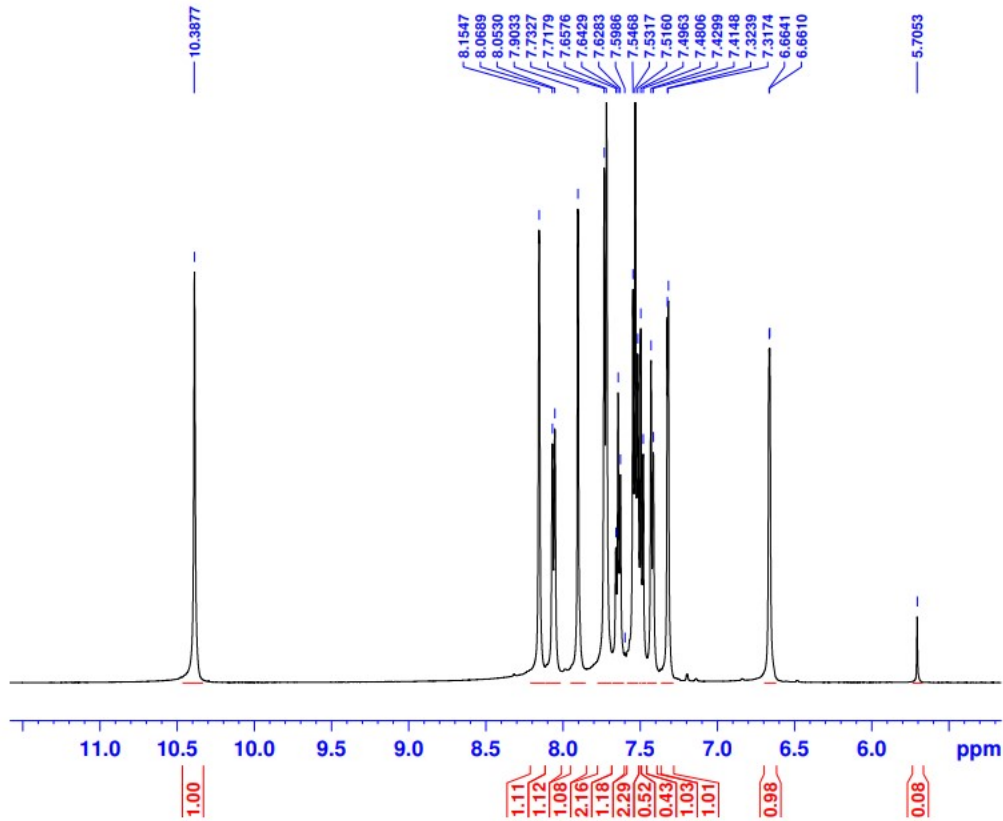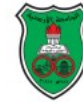

The University of Jordan  
Faculty of Science  
Department of Chemistry

Instrument Model:  
Bruker 500 MHz-Avance III

Operator: Rola Hassouneh  
nmr500@ju.edu.jo

Current Data Parameters  
NAME 18sep15jalal  
EXPNO 461  
PROCNO 1

F2 - Acquisition Parameters  
Date\_ 20180923  
Time 10.13  
INSTRUM spect  
PROBHD 5 mm PABBO BB/  
PULPROG zg  
TD 65536  
SOLVENT DMSO  
NS 4  
DS 0  
SWH 10000.000 Hz  
FIDRES 0.152588 Hz  
AQ 3.2767999 sec  
RG 17.8  
DW 50.000 usec  
DE 6.50 usec  
TE 298.0 K  
D1 2.00000000 sec  
TD0 1

==== CHANNEL f1 =====  
SFO1 500.1328380 MHz  
NUC1 1H  
P1 10.60 usec  
PLW1 17.39999962 W

F2 - Processing parameters  
SI 131072  
SF 500.1300270 MHz  
WDW EM  
SSB 0  
LB 1.00 Hz  
GB 0  
PC 1.00

A2

F3BP  
NMR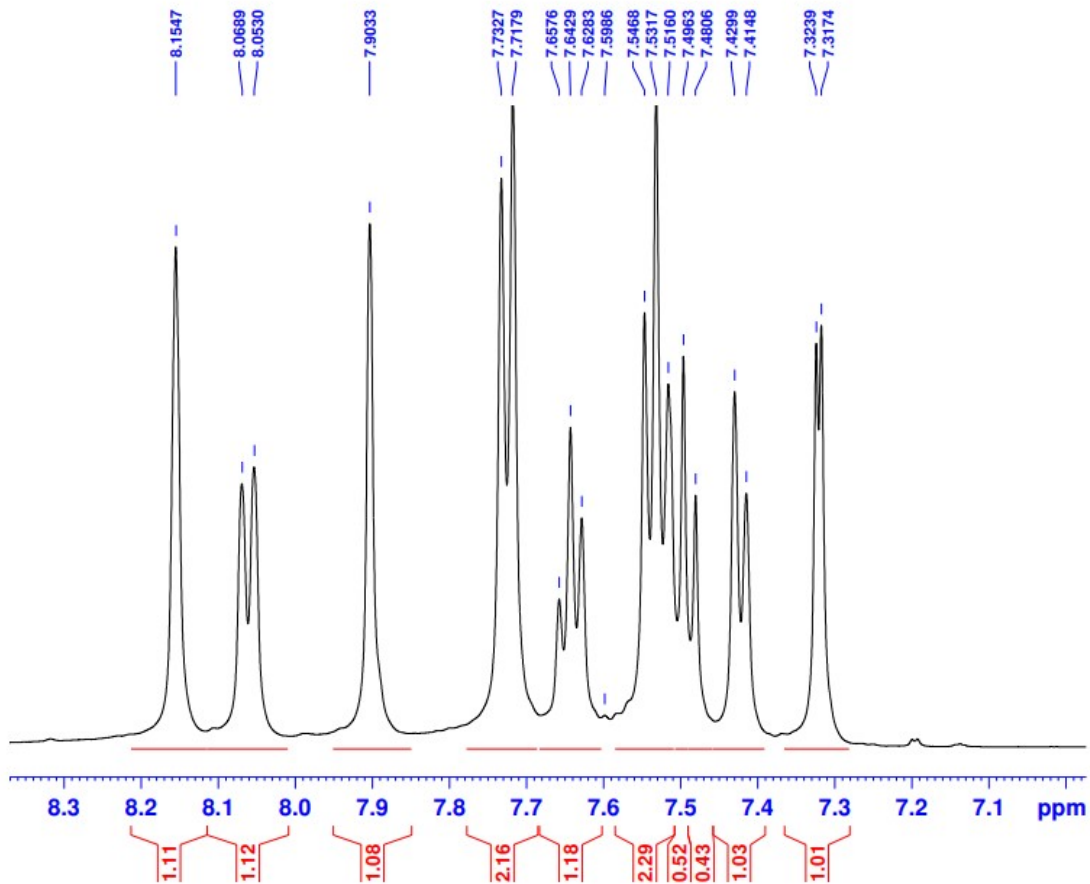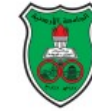

The University of Jordan  
Faculty of Science  
Department of Chemistry

Instrument Model:  
Bruker 500 MHz-Avance III

Operator: Rola Hassouneh  
nmr500@ju.edu.jo

Current Data Parameters  
NAME 18sep15jalal  
EXPNO 461  
PROCNO 1

F2 - Acquisition Parameters  
Date\_ 20180923  
Time 10.13  
INSTRUM spect  
PROBHD 5 mm PABBO BB/  
PULPROG zg  
TD 65536  
SOLVENT DMSO  
NS 4  
DS 0  
SWH 10000.000 Hz  
FIDRES 0.152588 Hz  
AQ 3.2767999 sec  
RG 17.8  
DW 50.000 usec  
DE 6.50 usec  
TE 298.0 K  
D1 2.00000000 sec  
TD0 1

===== CHANNEL f1 =====  
SF01 500.1328380 MHz  
NUC1 1H  
P1 10.60 usec  
PLW1 17.39999962 W

F2 - Processing parameters  
SI 131072  
SF 500.1300270 MHz  
WDW EM  
SSB 0  
LB 1.00 Hz  
GB 0  
PC 1.00



A2

F3BP  
C13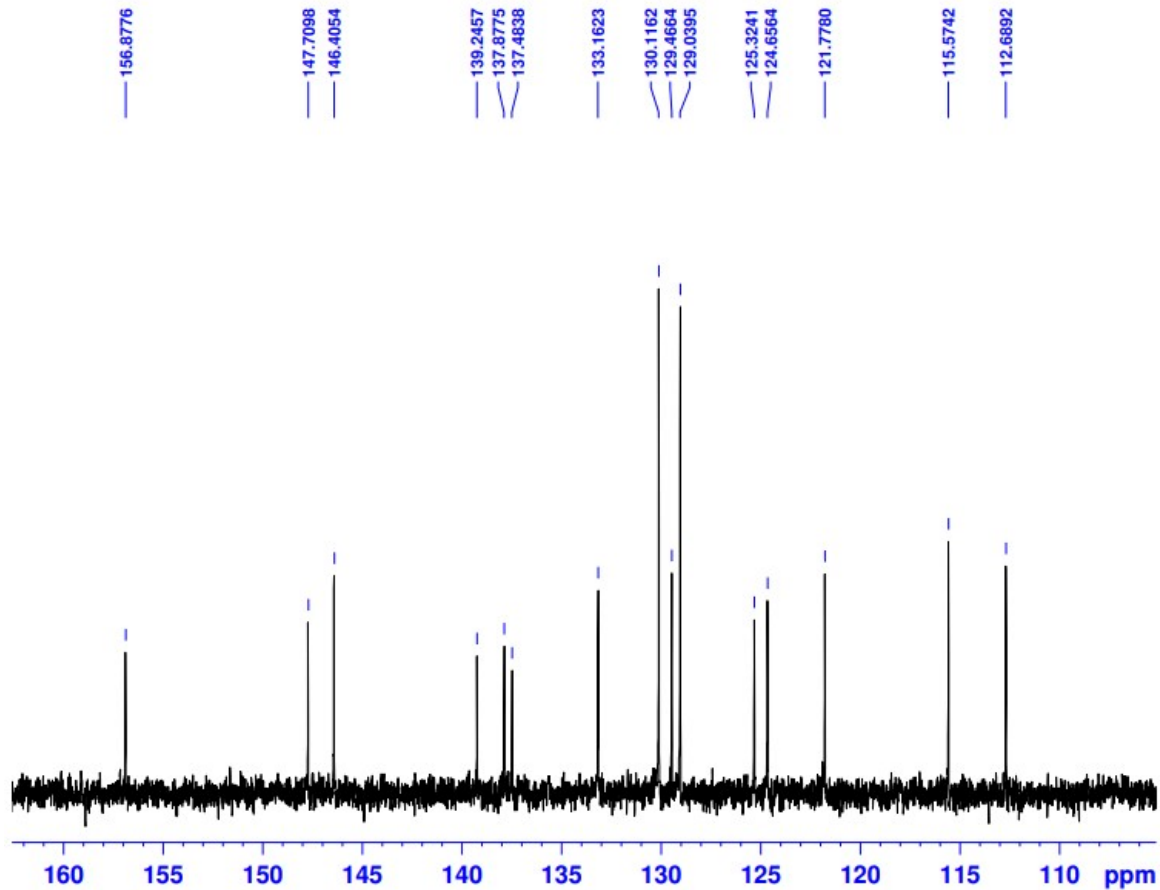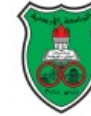

The University of Jordan  
Faculty of Science  
Department of Chemistry

Instrument Model:  
Bruker 500 MHz-Avance III

Operator: Rola Hassouneh  
nmr500@ju.edu.jo

Current Data Parameters  
NAME 18sep15jalal  
EXPNO 462  
PROCNO 1

F2 - Acquisition Parameters  
Date\_ 20180923  
Time 10.14  
INSTRUM spect  
PROBHD 5 mm PABBO BB/  
PULPROG zgpg30  
TD 65536  
SOLVENT DMSO  
NS 24  
DS 4  
SWH 25510.203 Hz  
FIDRES 0.389255 Hz  
AQ 1.2845056 sec  
RG 202.06  
DW 19.600 usec  
DE 6.50 usec  
TE 298.3 K  
D1 2.00000000 sec  
D11 0.03000000 sec  
TD0 1

===== CHANNEL f1 =====  
SFO1 125.7717803 MHz  
NUC1 13C  
P1 9.80 usec  
PLW1 93.32499695 W

===== CHANNEL f2 =====  
SFO2 500.1320005 MHz  
NUC2 1H  
PCPDPRG2 waltz16  
PCPD2 80.00 usec  
PLW2 17.37800026 W  
PLW12 0.36307999 W  
PLW13 0.22982000 W

F2 - Processing parameters  
SI 32768  
SF 125.7577890 MHz  
WDW EM  
SSB 0  
LB 1.00 Hz  
GB 0  
PC 1.40

A3

F3BP  
dept135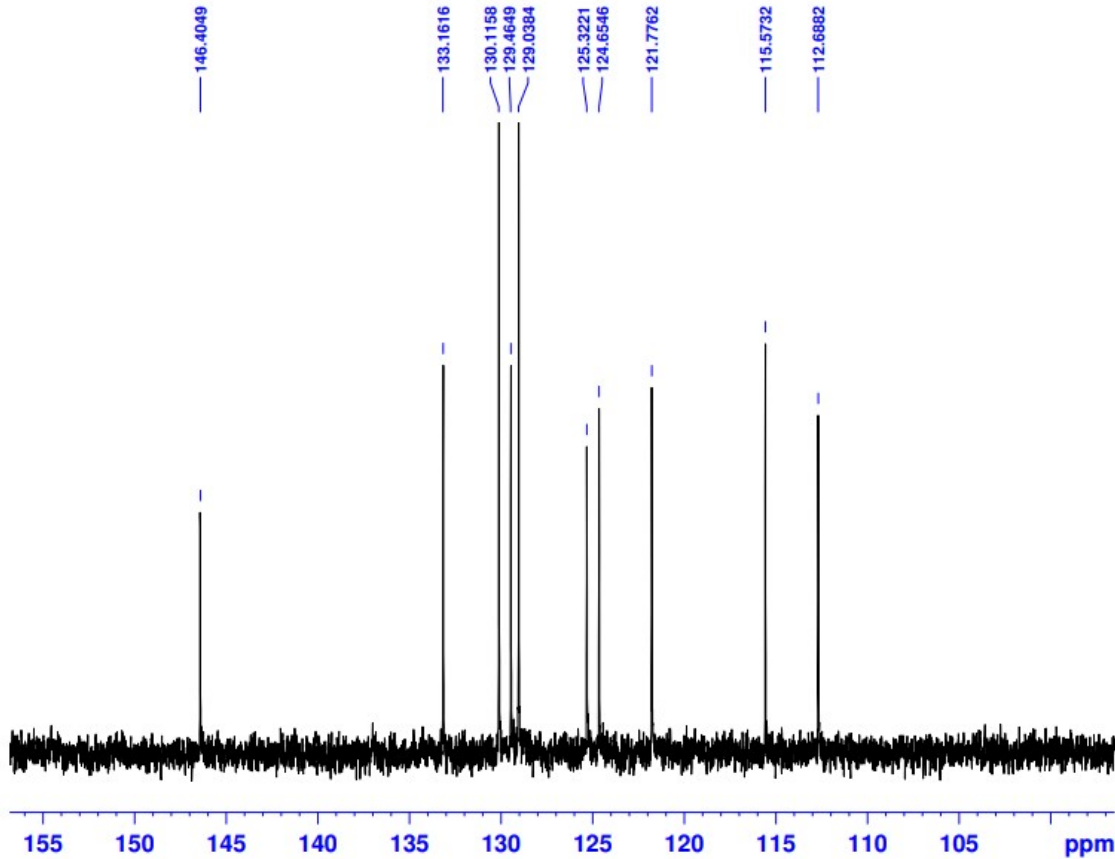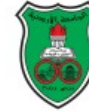

The University of Jordan  
Faculty of Science  
Department of Chemistry

Instrument Model:  
Bruker 500 MHz-Avance III

Operator: Rola Hassouneh  
nmr500@ju.edu.jo

Current Data Parameters  
NAME 18sep15jalal  
EXPNO 463  
PROCNO 1

F2 - Acquisition Parameters  
Date\_ 20180923  
Time 10.17  
INSTRUM spect  
PROBHD 5 mm PABBO BB/  
PULPROG deptsp135  
TD 65536  
SOLVENT DMSO  
NS 21  
DS 4  
SWH 23148.148 Hz  
FIDRES 0.353213 Hz  
AQ 1.4155777 sec  
RG 202.06  
DW 21.600 usec  
DE 6.50 usec  
TE 298.0 K  
CNST2 145.0000000  
D1 2.00000000 sec  
D2 0.00344828 sec  
D12 0.00002000 sec  
TDO 1

----- CHANNEL f1 -----  
SFO1 125.7705392 MHz  
NUC1 13C  
P1 9.80 usec  
P13 2000.00 usec  
PLM0 0 W  
PLM1 93.32499695 W  
SFRM1[5] Crp60comp. 4  
SFOALS 0.500  
SPOFFS5 0 Hz  
SPW5 13.69400024 W

----- CHANNEL f2 -----  
SFO2 500.1315995 MHz  
NUC2 1H  
CPOPRG[2] waltz16  
P3 11.50 usec  
P4 23.00 usec  
PCPD2 80.00 usec  
PLM2 17.37800026 W  
PLM12 0.36307999 W

F2 - Processing parameters  
SI 32768  
SF 125.7577890 MHz  
WDW EM  
SBB 0  
LB 1.00 Hz  
GB 0  
PC 1.40

A3

F2BP  
NMR

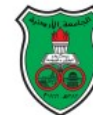

The University of Jordan  
Faculty of Science  
Department of Chemistry

Instrument Model:  
Bruker 500 MHz-Avance III

Operator: Rola Hassouneh  
nmr500@ju.edu.jo

Current Data Parameters  
NAME 18sep15jalal  
EXPNO 431  
PROCNO 1

F2 - Acquisition Parameters  
Date\_ 20180923  
Time 9.31  
INSTRUM spect  
PROBHD 5 mm PABBO BB/  
PULPROG zg  
TD 65536  
SOLVENT DMSO  
NS 8  
DS 0  
SWH 9328.358 Hz  
FIDRES 0.142339 Hz  
AQ 3.5127296 sec  
RG 17.8  
DW 53.600 usec  
DE 6.50 usec  
TE 298.0 K  
D1 2.00000000 sec  
TD0 1

===== CHANNEL f1 =====  
SF01 500.1328380 MHz  
NUC1 1H  
P1 10.60 usec  
PLW1 17.39999962 W

F2 - Processing parameters  
SI 131072  
SF 500.1300270 MHz  
WDW EM  
SSB 0  
LB 1.00 Hz  
GB 0  
PC 1.00

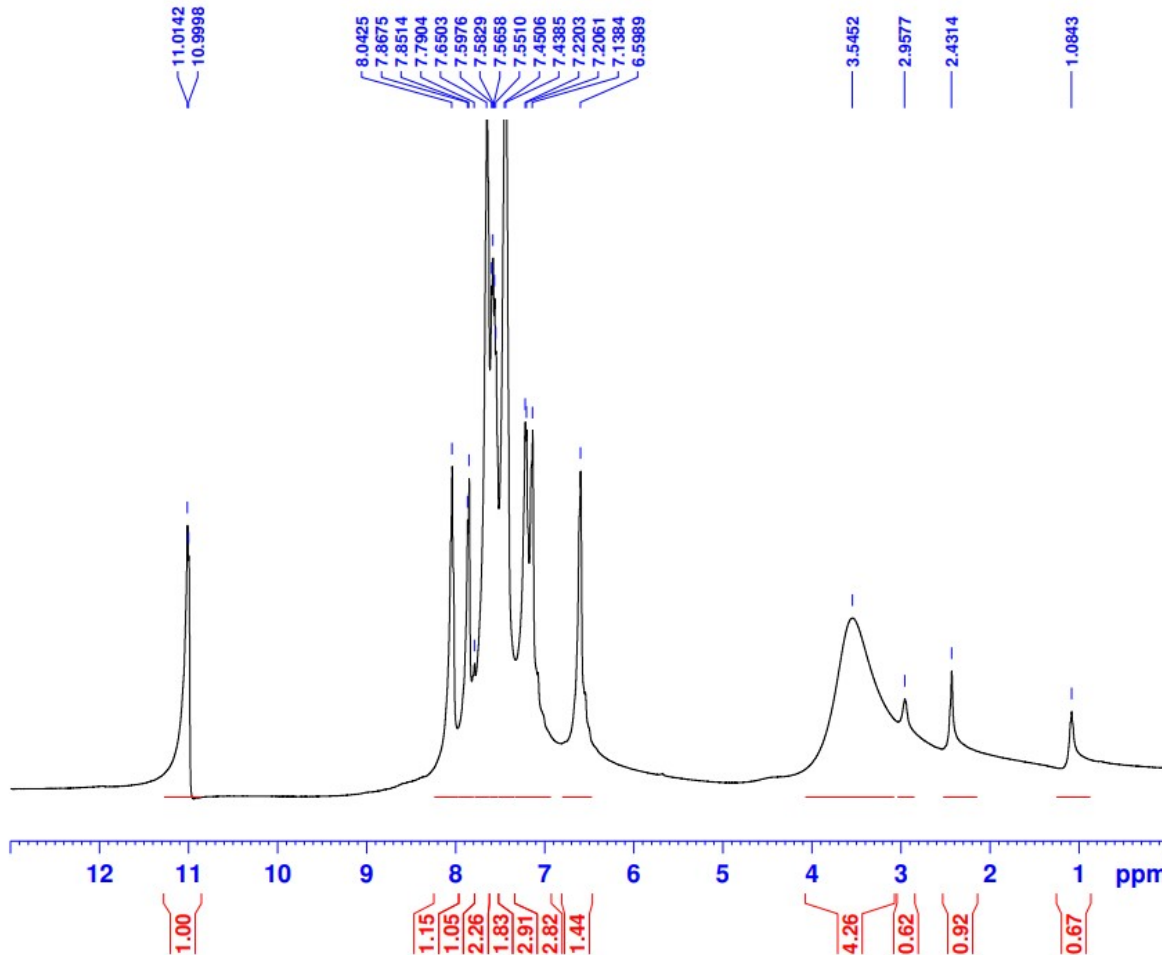

A3

F2BP  
C13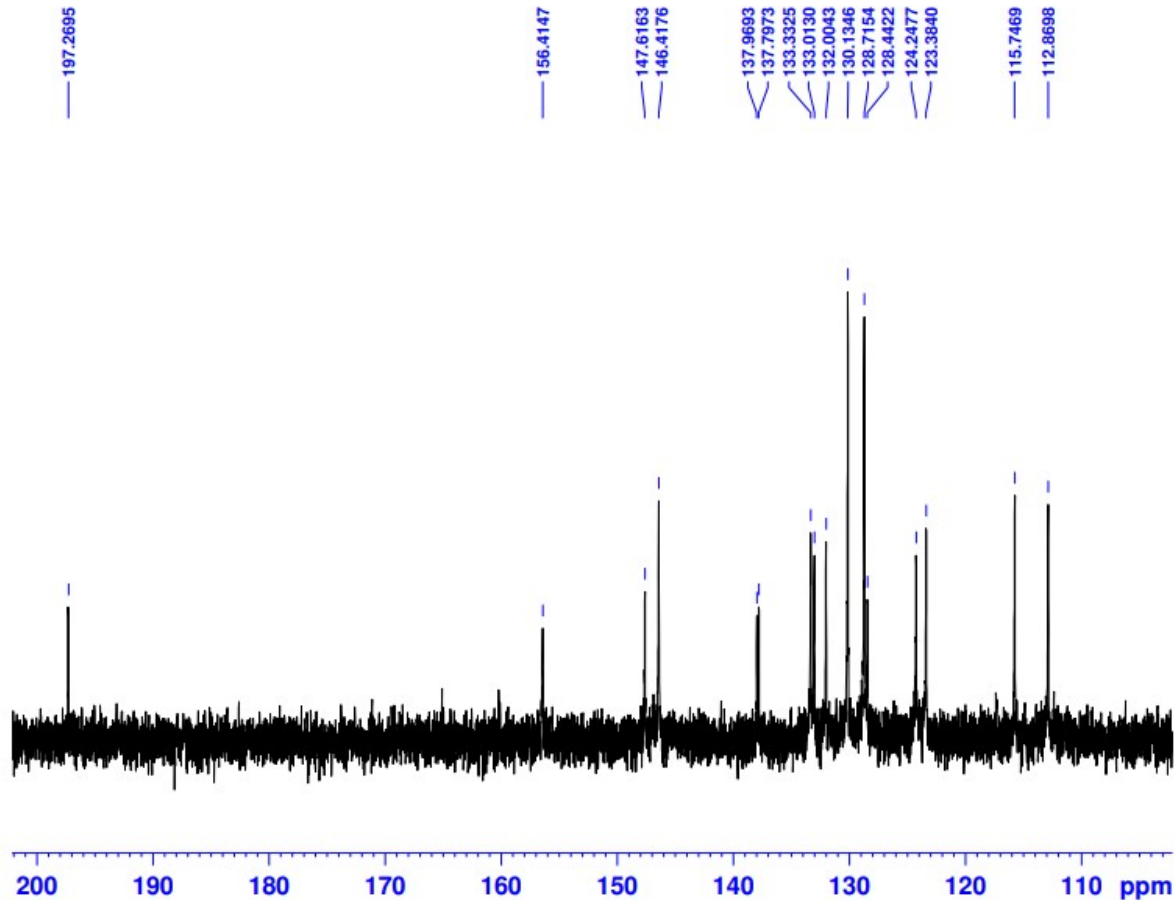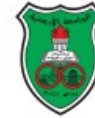

The University of Jordan  
Faculty of Science  
Department of Chemistry

Instrument Model:  
Bruker 500 MHz-Avance III

Operator: Rola Hassouneh  
nmr500@ju.edu.jo

Current Data Parameters  
NAME 18sep15jalal  
EXPNO 432  
PROCNO 1

F2 - Acquisition Parameters  
Date\_ 20180923  
Time 9.31  
INSTRUM spect  
PROBHD 5 mm PABBO BB/  
PULPROG zgpg30  
TD 65536  
SOLVENT DMSO  
NS 87  
DS 4  
SWH 25510.203 Hz  
FIDRES 0.389255 Hz  
AQ 1.2845056 sec  
RG 202.06  
DW 19.600 usec  
DE 6.50 usec  
TE 298.2 K  
D1 2.00000000 sec  
D11 0.03000000 sec  
TD0 1

===== CHANNEL f1 =====  
SFO1 125.7717803 MHz  
NUC1 13C  
P1 9.80 usec  
PLW1 93.32499695 W

===== CHANNEL f2 =====  
SFO2 500.1320005 MHz  
NUC2 1H  
CPDPRG[2] waltz16  
PCPD2 80.00 usec  
PLW2 17.37800026 W  
PLW12 0.36307999 W  
PLW13 0.22982000 W

F2 - Processing parameters  
SI 32768  
SF 125.7577890 MHz  
WDW EM  
SSB 0  
LB 1.00 Hz  
GB 0  
PC 1.40

A3

F2BP  
dept135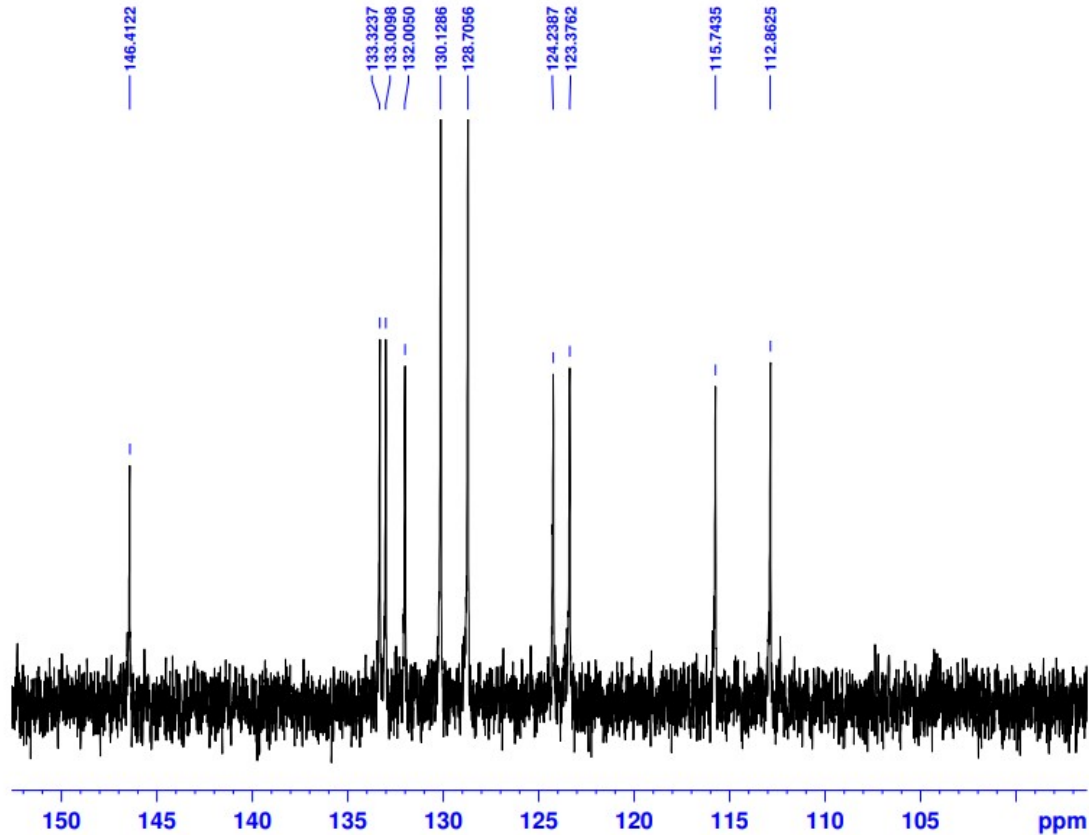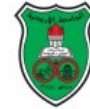

The University of Jordan  
Faculty of Science  
Department of Chemistry

Instrument Model:  
Bruker 500 MHz-Avance III

Operator: Rola Hassouneh  
nmr500@ju.edu.jo

Current Data Parameters  
NAME 18sep15jalal  
EXPNO 433  
PROCNO 1

F2 - Acquisition Parameters  
Date\_ 20180923  
Time 9.38  
INSTRUM spect  
PROBHD 5 mm F2BP0 BB/  
PULPROG deptap135  
TD 65536  
SOLVENT DMSO  
NS 33  
DS 4  
SWH 23148.148 Hz  
FIDRES 0.353213 Hz  
AQ 1.4155777 sec  
RG 202.06  
DW 21.600 usec  
DE 6.50 usec  
TE 298.0 K  
CNST2 145.0000000  
D1 2.0000000 sec  
D2 0.00344828 sec  
D12 0.00002000 sec  
TDO 1

----- CHANNEL f1 -----  
SF01 125.7705392 MHz  
NUC1 13C  
P1 9.80 usec  
P13 2000.00 usec  
PLM0 0 W  
PLM1 93.32499695 W  
SPNAM[5] Crp60comp.4  
SFOALS 0.500  
SPOFFS5 0 Hz  
SPW5 13.69400024 W

----- CHANNEL f2 -----  
SF02 500.1315995 MHz  
NUC2 1H  
CPDPRG[2] waltz16  
P3 11.50 usec  
P4 23.00 usec  
PCPD2 80.00 usec  
PLM2 17.37800026 W  
PLM12 0.36307999 W

F2 - Processing parameters  
SI 32768  
SF 125.7577890 MHz  
NEW SW  
SSB 0  
LB 1.00 Hz  
GB 0  
PC 1.40

A4

F4AP  
NMR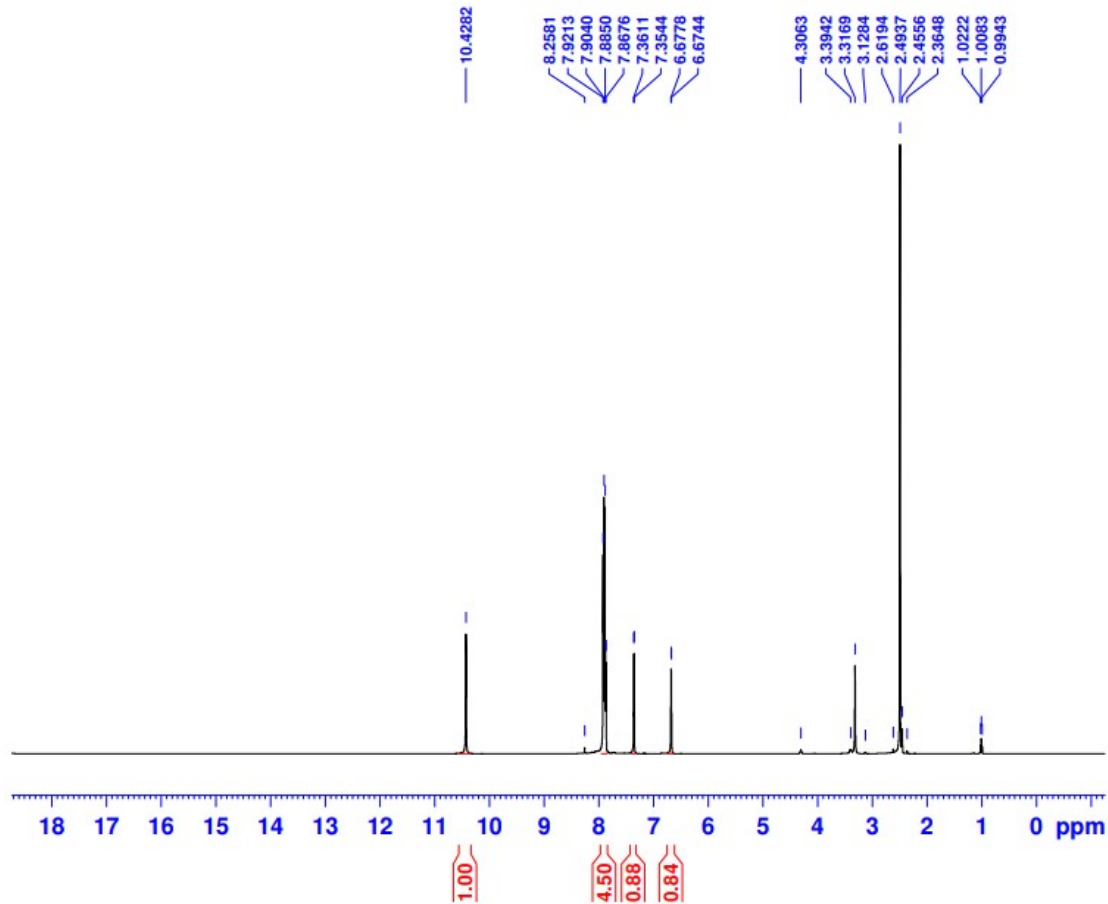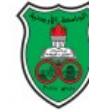

The University of Jordan  
Faculty of Science  
Department of Chemistry

Instrument Model:  
Bruker 500 MHz–Avance III

Operator: Rola Hassouneh  
nmr500@ju.edu.jo

Current Data Parameters  
NAME 18nov01jalal  
EXPNO 941  
PROCNO 1

F2 - Acquisition Parameters  
Date\_ 20181107  
Time 12.58  
INSTRUM spect  
PROBHD 5 mm PABBO BB/  
PULPROG zg  
TD 65536  
SOLVENT DMSO  
NS 16  
DS 0  
SWH 10000.000 Hz  
FIDRES 0.152588 Hz  
AQ 3.2767999 sec  
RG 49.66  
DW 50.000 usec  
DE 6.50 usec  
TE 298.2 K  
D1 2.00000000 sec  
TD0 1

===== CHANNEL f1 =====  
SFO1 500.1343971 MHz  
NUC1 1H  
P1 10.60 usec  
PLW1 17.39999962 W

F2 - Processing parameters  
SI 131072  
SF 500.1300270 MHz  
WDW EM  
SSB 0  
LB 0.50 Hz  
GB 0  
PC 5.00

A4

F4AP  
NMR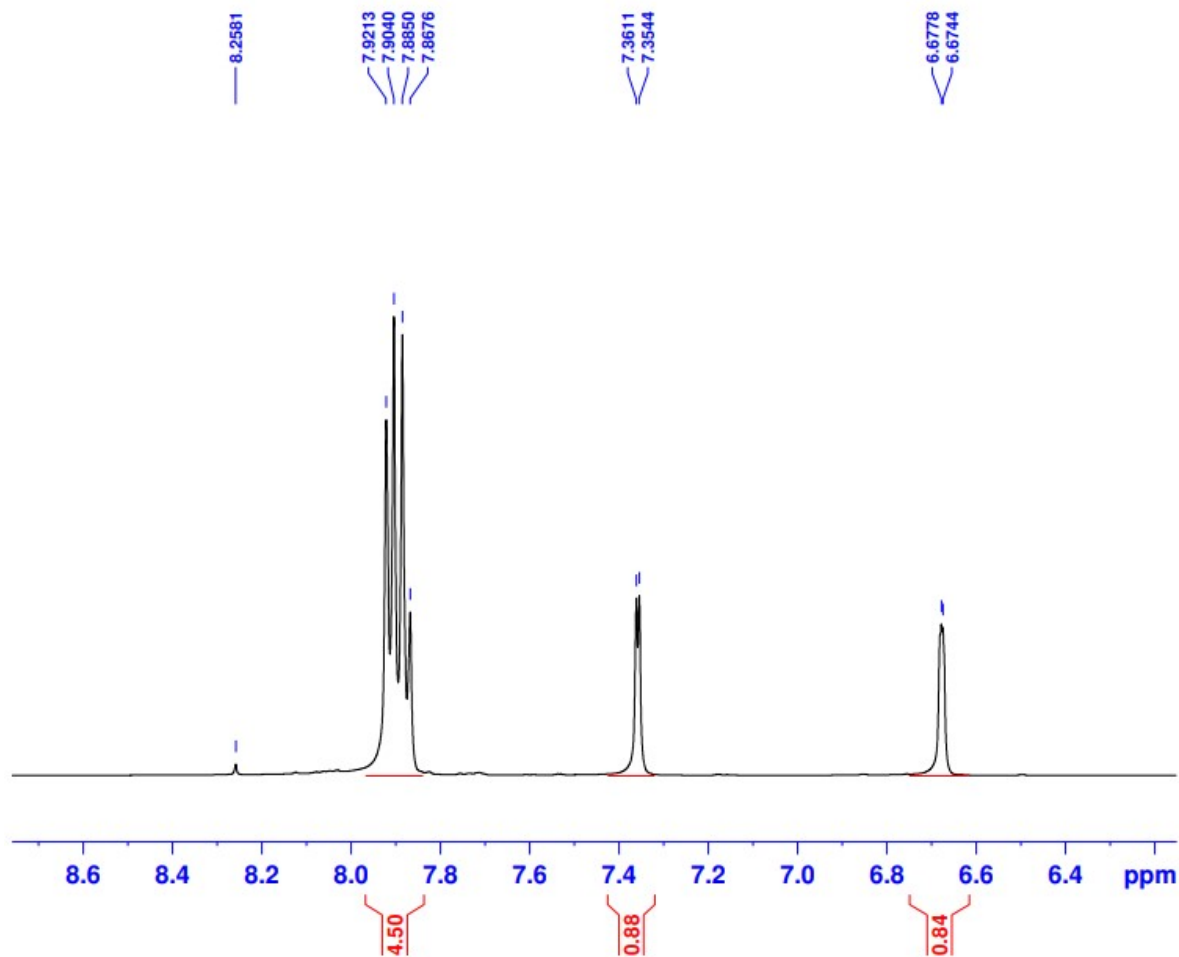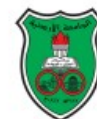

The University of Jordan  
Faculty of Science  
Department of Chemistry

Instrument Model:  
Bruker 500 MHz-Avance III

Operator: Rola Hassouneh  
nmr500@ju.edu.jo

Current Data Parameters  
NAME 18nov01jalal  
EXPNO 941  
PROCNO 1

F2 - Acquisition Parameters  
Date\_ 20181107  
Time 12.58  
INSTRUM spect  
PROBHD 5 mm PABBO BB/  
PULPROG zg  
TD 65536  
SOLVENT DMSO  
NS 16  
DS 0  
SWH 10000.000 Hz  
FIDRES 0.152588 Hz  
AQ 3.2767999 sec  
RG 49.66  
DW 50.000 usec  
DE 6.50 usec  
TE 298.2 K  
D1 2.00000000 sec  
TD0 1

===== CHANNEL f1 =====  
SF01 500.1343971 MHz  
NUC1 1H  
P1 10.60 usec  
PLW1 17.39999962 W

F2 - Processing parameters  
SI 131072  
SF 500.1300270 MHz  
WDW EM  
SSB 0  
LB 0.50 Hz  
GB 0  
PC 5.00

A4

F4AP  
C13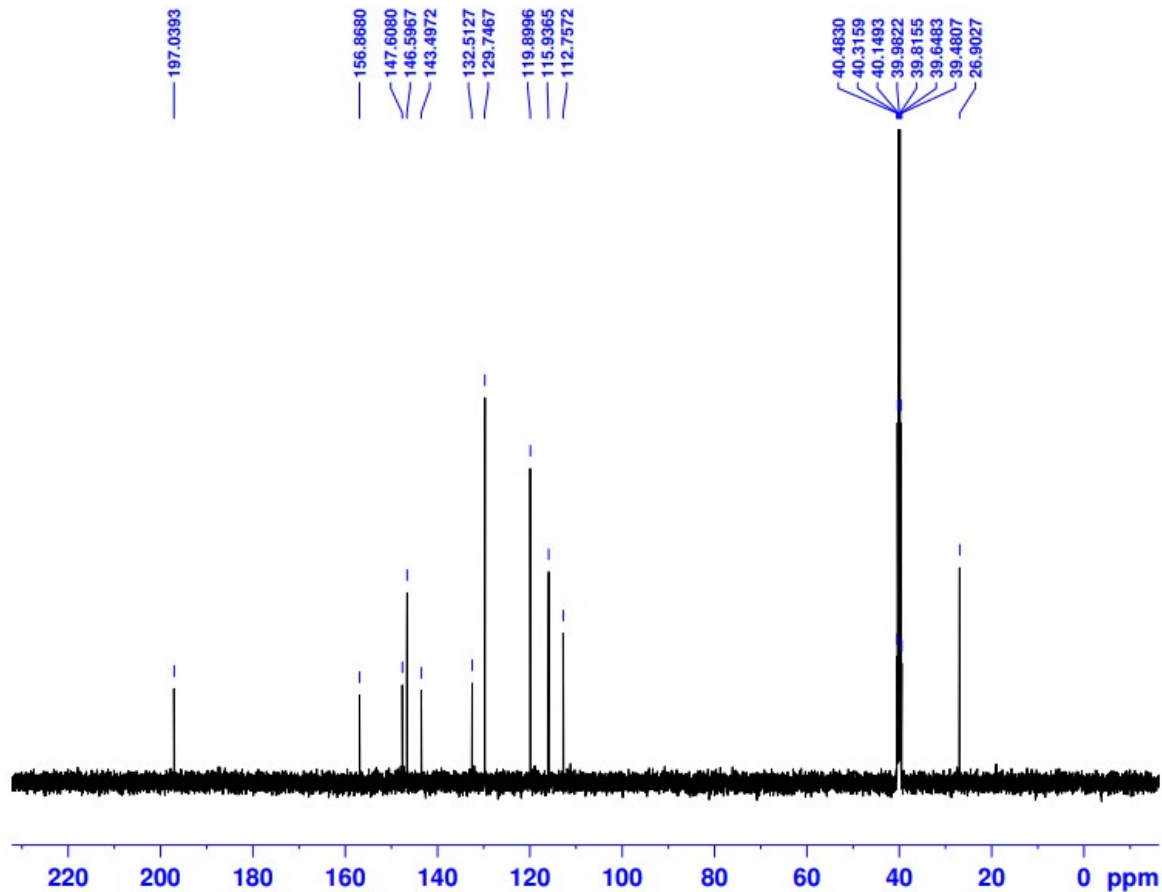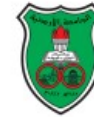

The University of Jordan  
Faculty of Science  
Department of Chemistry

Instrument Model:  
Bruker 500 MHz-Avance III

Operator: Rola Hassounch  
nmr500@ju.edu.jo

Current Data Parameters  
NAME 18nov01jalal  
EXPNO 942  
PROCNO 1

F2 - Acquisition Parameters  
Date\_ 20181107  
Time 13.00  
INSTRUM spect  
PROBHD 5 mm PABBO BB/  
PULPROG zgpg30  
TD 65536  
SOLVENT DMSO  
NS 27  
DS 4  
SWH 31250.000 Hz  
FIDRES 0.476837 Hz  
AQ 1.0485760 sec  
RG 202.06  
DW 16.000 usec  
DE 6.50 usec  
TE 298.3 K  
D1 2.00000000 sec  
D11 0.03000000 sec  
TDO 1

===== CHANNEL f1 =====  
SFO1 125.7713681 MHz  
NUC1 13C  
P1 9.80 usec  
PLW1 93.32499695 W

===== CHANNEL f2 =====  
SFO2 500.1320005 MHz  
NUC2 1H  
CPDPRG[2] waltz16  
PCPD2 80.00 usec  
PLW2 17.37800026 W  
PLW12 0.36307999 W  
PLW13 0.22982000 W

F2 - Processing parameters  
SI 32768  
SF 125.7577890 MHz  
WDW EM  
SSB 0  
LB 1.00 Hz  
GB 0  
PC 1.80



A5

F4As  
NMR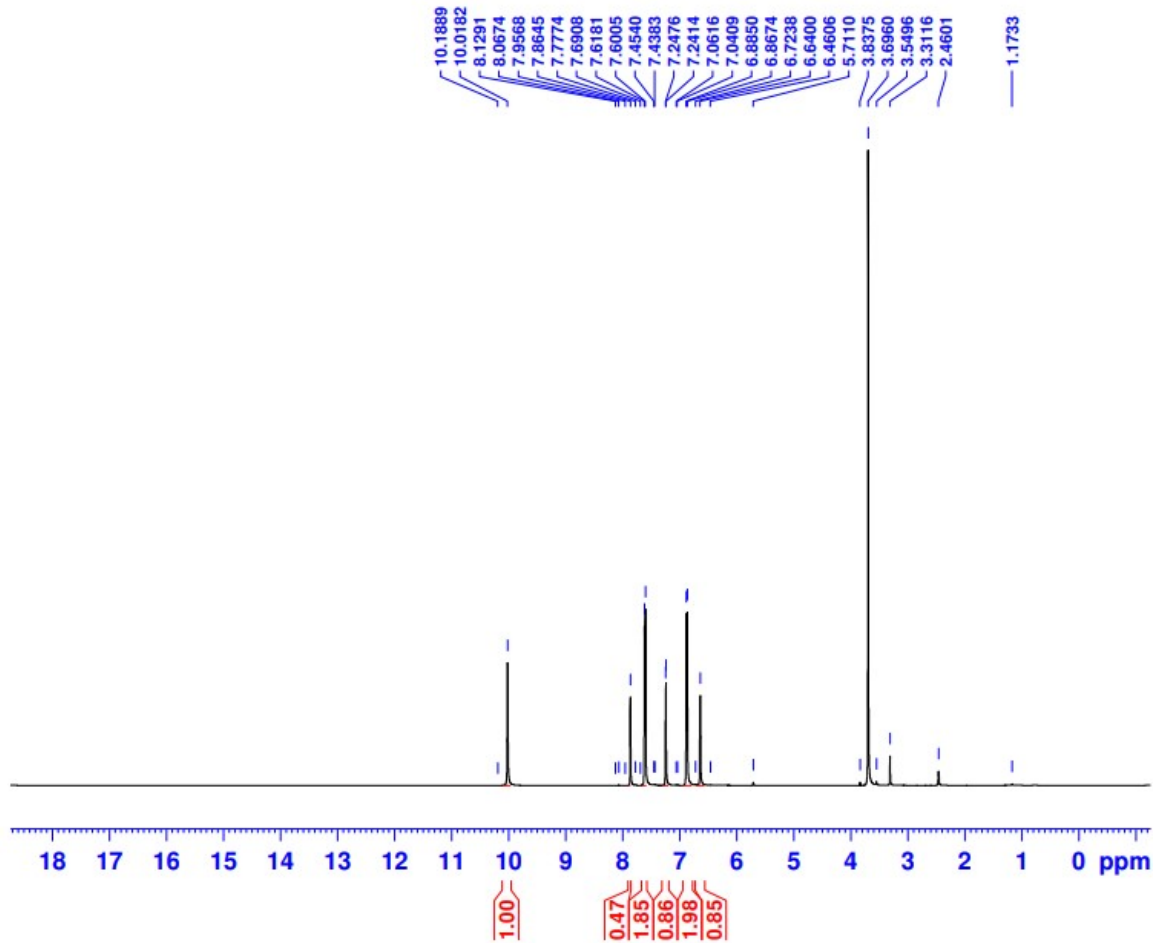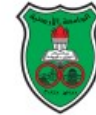

The University of Jordan  
Faculty of Science  
Department of Chemistry

Instrument Model:  
Bruker 500 MHz-Avance III

Operator: Rola Hassouneh  
nmr500@ju.edu.jo

Current Data Parameters  
NAME 19jan01jalal  
EXPNO 711  
PROCNO 1

F2 - Acquisition Parameters  
Date\_ 20190106  
Time 13.43  
INSTRUM spect  
PROBHD 5 mm PABBO BB/  
PULPROG zg  
TD 65536  
SOLVENT DMSO  
NS 4  
DS 0  
SWH 10000.000 Hz  
FIDRES 0.152588 Hz  
AQ 3.2767999 sec  
RG 13.83  
DW 50.000 usec  
DE 6.50 usec  
TE 298.2 K  
D1 2.00000000 sec  
TD0 1

===== CHANNEL f1 =====  
SF01 500.1343971 MHz  
NUC1 1H  
P1 10.60 usec  
PLW1 17.39999962 W

F2 - Processing parameters  
SI 131072  
SF 500.1300270 MHz  
WDW EM  
SSB 0  
LB 1.00 Hz  
GB 0  
PC 1.00

A5

F 4As  
NMR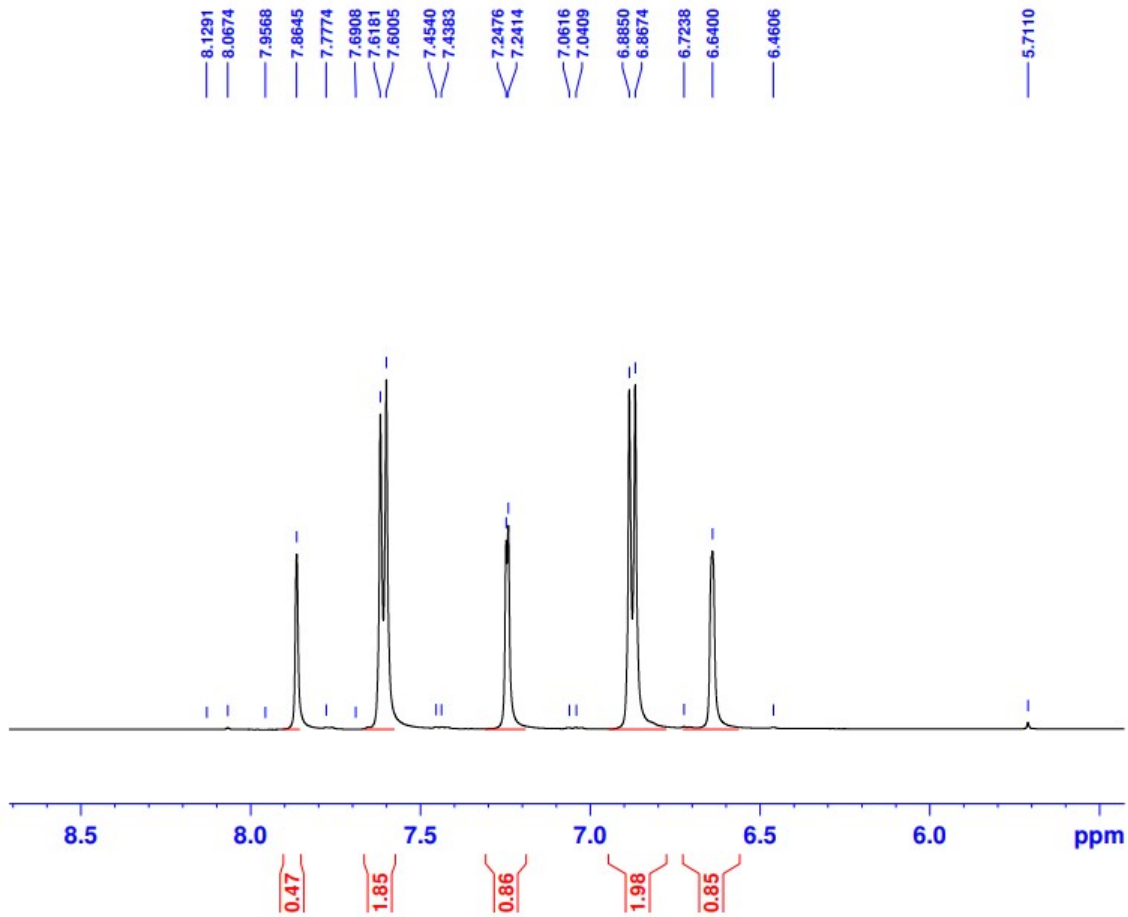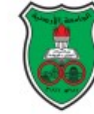

The University of Jordan  
Faculty of Science  
Department of Chemistry

Instrument Model:  
Bruker 500 MHz-Avance III

Operator: Rola Hassouneh  
nmr500@ju.edu.jo

Current Data Parameters  
NAME 19jan01jalal  
EXPNO 711  
PROCNO 1

F2 - Acquisition Parameters  
Date\_ 20190106  
Time 13.43  
INSTRUM spect  
PROBHD 5 mm PABBO BB/  
PULPROG zg  
TD 65536  
SOLVENT DMSO  
NS 4  
DS 0  
SWH 10000.000 Hz  
FIDRES 0.152588 Hz  
AQ 3.2767999 sec  
RG 13.83  
DW 50.000 usec  
DE 6.50 usec  
TE 298.2 K  
D1 2.00000000 sec  
TD0 1

===== CHANNEL f1 =====  
SF01 500.1343971 MHz  
NUC1 1H  
P1 10.60 usec  
PLW1 17.39999962 W

F2 - Processing parameters  
SI 131072  
SF 500.1300270 MHz  
WDW EM  
SSB 0  
LB 1.00 Hz  
GB 0  
PC 1.00

A5

F4As  
C13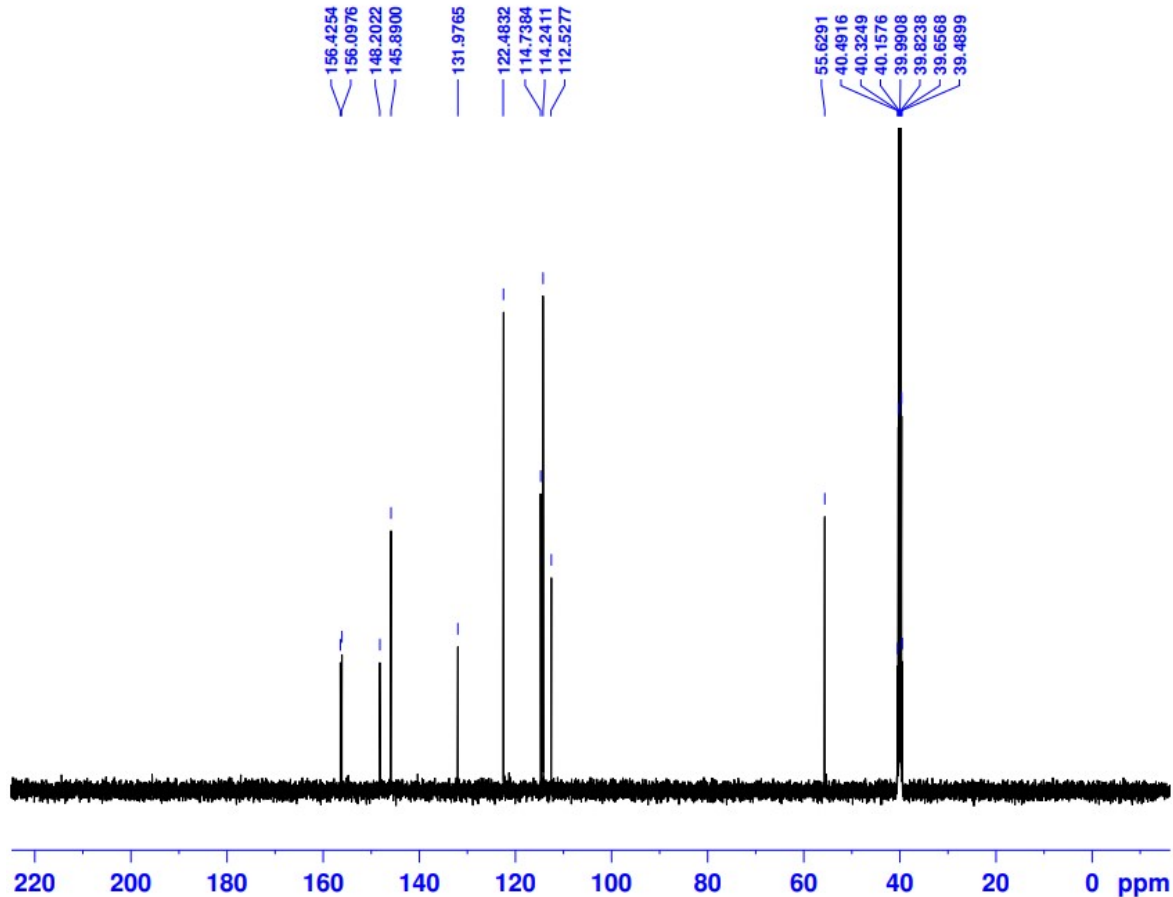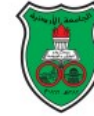

The University of Jordan  
Faculty of Science  
Department of Chemistry

Instrument Model:  
Bruker 500 MHz–Avance III

Operator: Rola Hassouneh  
nmr500@ju.edu.jo

Current Data Parameters  
NAME 19jan01jalal  
EXPNO 712  
PROCNO 1

F2 - Acquisition Parameters  
Date\_ 20190106  
Time 13.45  
INSTRUM spect  
PROBHD 5 mm PABBO BB/  
PULPROG zgpg30  
TD 65536  
SOLVENT DMSO  
NS 29  
DS 4  
SWH 31250.000 Hz  
FIDRES 0.476837 Hz  
AQ 1.0485760 sec  
RG 202.06  
DW 16.000 usec  
DE 6.50 usec  
TE 298.2 K  
D1 2.00000000 sec  
D11 0.03000000 sec  
TD0 1

----- CHANNEL f1 -----  
SFO1 125.7713681 MHz  
NUC1 13C  
P1 9.80 usec  
PLW1 93.32499695 W

----- CHANNEL f2 -----  
SFO2 500.1320005 MHz  
NUC2 1H  
CPDPRG2 waltz16  
PCPD2 80.00 usec  
PLW2 17.37800026 W  
PLW12 0.36307999 W  
PLW13 0.22982000 W

F2 - Processing parameters  
SI 32768  
SF 125.7577890 MHz  
WDW EM  
SSB 0  
IR 1 00 Hz

A5

F4As  
dept135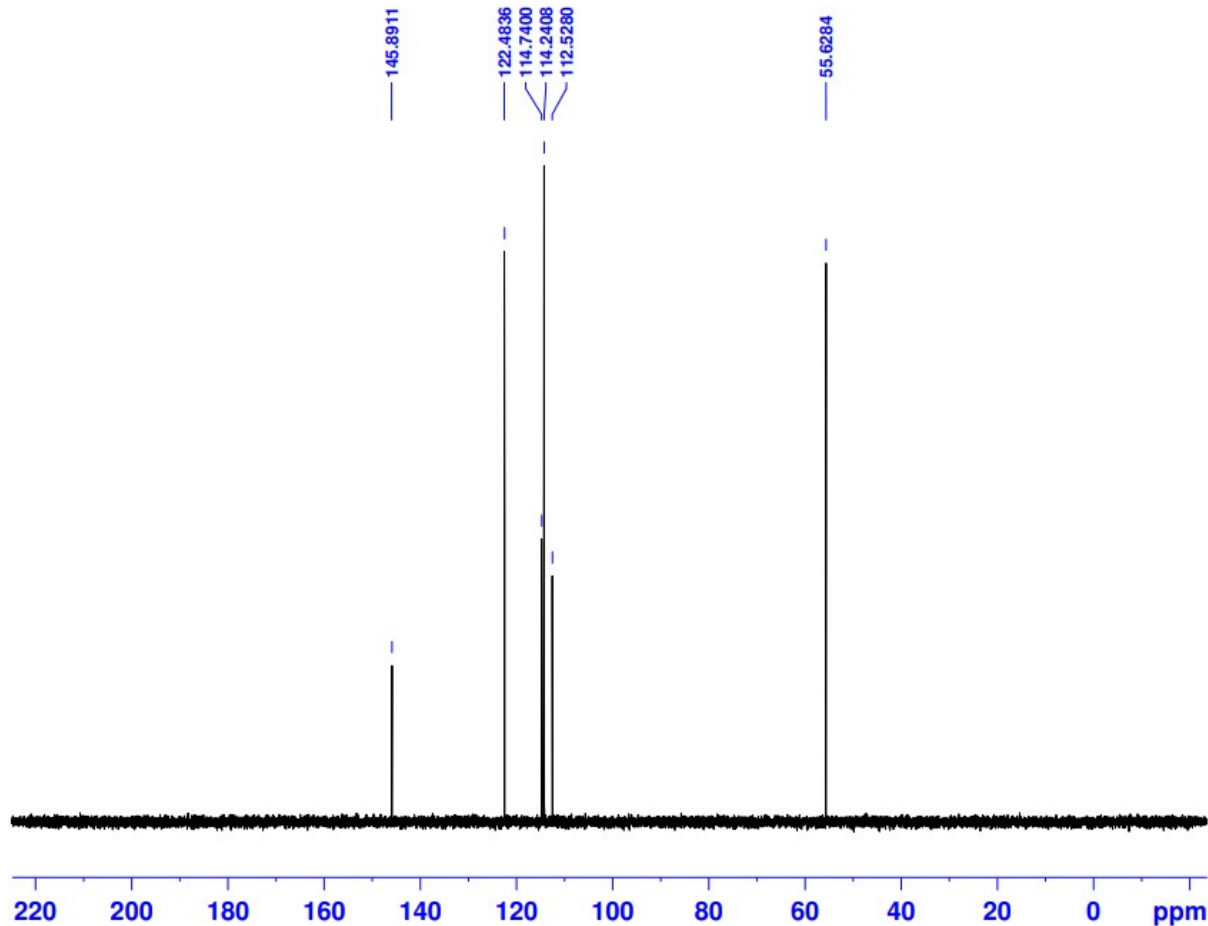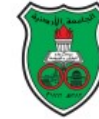

The University of Jordan  
Faculty of Science  
Department of Chemistry

Instrument Model:  
Bruker 500 MHz–Avance III

Operator: Rola Hassouneh  
nmr500@ju.edu.jo

Current Data Parameters  
NAME 19jan01jalal  
EXPNO 713  
PROCNO 1

F2 - Acquisition Parameters  
Date\_ 20190106  
Time 13.47  
INSTRUM spect  
PROBHD 5 mm F4BBO BB/  
PULPROG deptsp135  
TD 65336  
SOLVENT DMSO  
NS 33  
DS 4  
SWH 31250.000 Hz  
FIDRES 0.476837 Hz  
AQ 1.0485760 sec  
RG 202.06  
DM 16.000 usec  
DE 6.50 usec  
TE 298.2 K  
CNST2 145.0000000  
D1 2.00000000 sec  
D2 0.00344828 sec  
D12 0.00062000 sec  
TD0 1

===== CHANNEL f1 =====  
SF01 125.7704414 MHz  
NUC1 13C  
P1 9.80 usec  
P13 2000.00 usec  
PLW0 0 W  
PLM1 93.32499695 W  
SPNAM[5] Crp60comp.4  
SFOAL5 0.500  
SFOFFS5 0 Hz  
SPW5 13.69400024 W

===== CHANNEL f2 =====  
SF02 500.1315995 MHz  
NUC2 1H  
CPDPRG[2] waltz16  
P3 11.50 usec  
P4 23.00 usec  
PCPD2 80.00 usec  
PLW2 17.37800024 W  
PLM2 0.36307999 W

F2 - Processing parameters  
SI 32768  
SF 125.7577890 MHz  
WDW EM

A6

F2CLAn  
NMR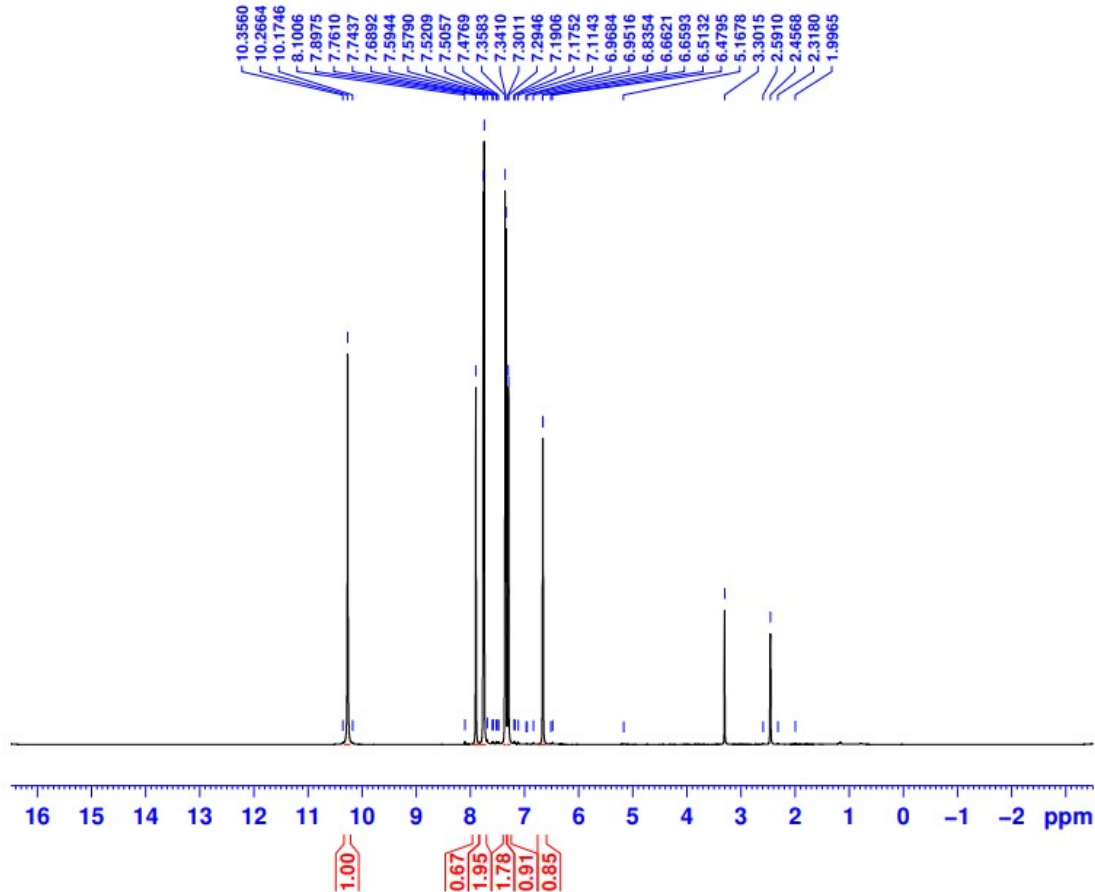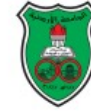

The University of Jordan  
Faculty of Science  
Department of Chemistry

Instrument Model:  
Bruker 500 MHz-Avance III

Operator: Rola Hassouneh  
nmr500@ju.edu.jo

Current Data Parameters  
NAME 19feb15jalal  
EXPNO 2401  
PROCNO 1

F2 - Acquisition Parameters  
Date\_ 20190225  
Time 13.26  
INSTRUM spect  
PROBHD 5 mm PABBO BB/  
PULPROG zg  
TD 65536  
SOLVENT DMSO  
NS 4  
DS 0  
SWH 10000.000 Hz  
FIDRES 0.152588 Hz  
AQ 3.2767999 sec  
RG 43.6  
DW 50.000 usec  
DE 6.50 usec  
TE 298.0 K  
D1 2.00000000 sec  
TD0 1

===== CHANNEL f1 =====  
SF01 500.1332736 MHz  
NUC1 1H  
P1 10.60 usec  
PLW1 17.39999962 W

F2 - Processing parameters  
SI 131072  
SF 500.1300270 MHz  
WDW EM  
SSB 0  
LB 1.00 Hz  
GB 0  
PC 1.00

A6

F2CLAn  
NMR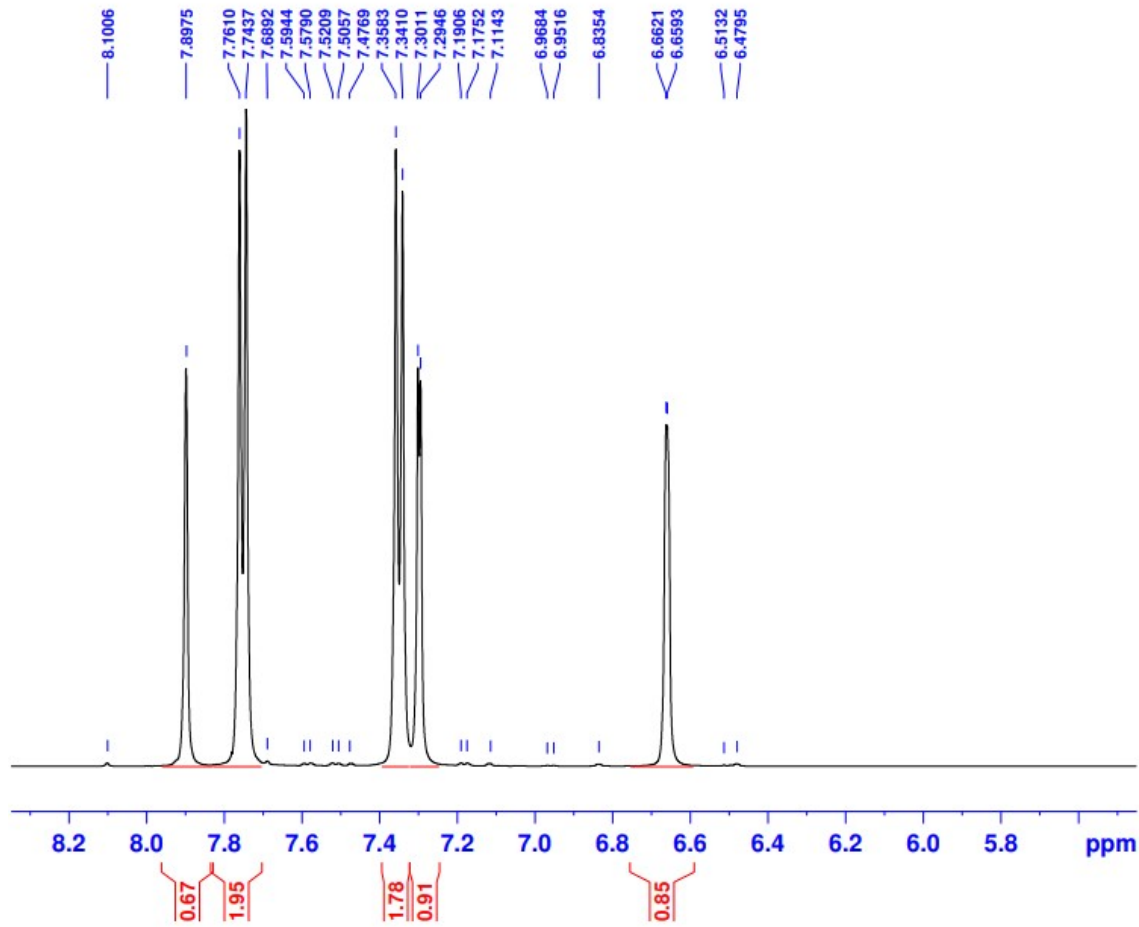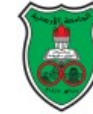

The University of Jordan  
Faculty of Science  
Department of Chemistry

Instrument Model:  
Bruker 500 MHz-Avance III

Operator: Rola Hassouneh  
nmr500@ju.edu.jo

Current Data Parameters  
NAME 19feb15jalal  
EXPNO 2401  
PROCNO 1

F2 - Acquisition Parameters  
Date\_ 20190225  
Time 13.26  
INSTRUM spect  
PROBHD 5 mm PABBO BB/  
PULPROG zg  
TD 65536  
SOLVENT DMSO  
NS 4  
DS 0  
SWH 10000.000 Hz  
FIDRES 0.152588 Hz  
AQ 3.2767999 sec  
RG 43.6  
DW 50.000 usec  
DE 6.50 usec  
TE 298.0 K  
D1 2.00000000 sec  
TDO 1

===== CHANNEL f1 =====  
SF01 500.1332736 MHz  
NUC1 1H  
P1 10.60 usec  
PLW1 17.39999962 W

F2 - Processing parameters  
SI 131072  
SF 500.1300270 MHz  
WDW EM  
SSB 0  
LB 1.00 Hz  
GB 0  
PC 1.00

A6

F2CLAn  
C13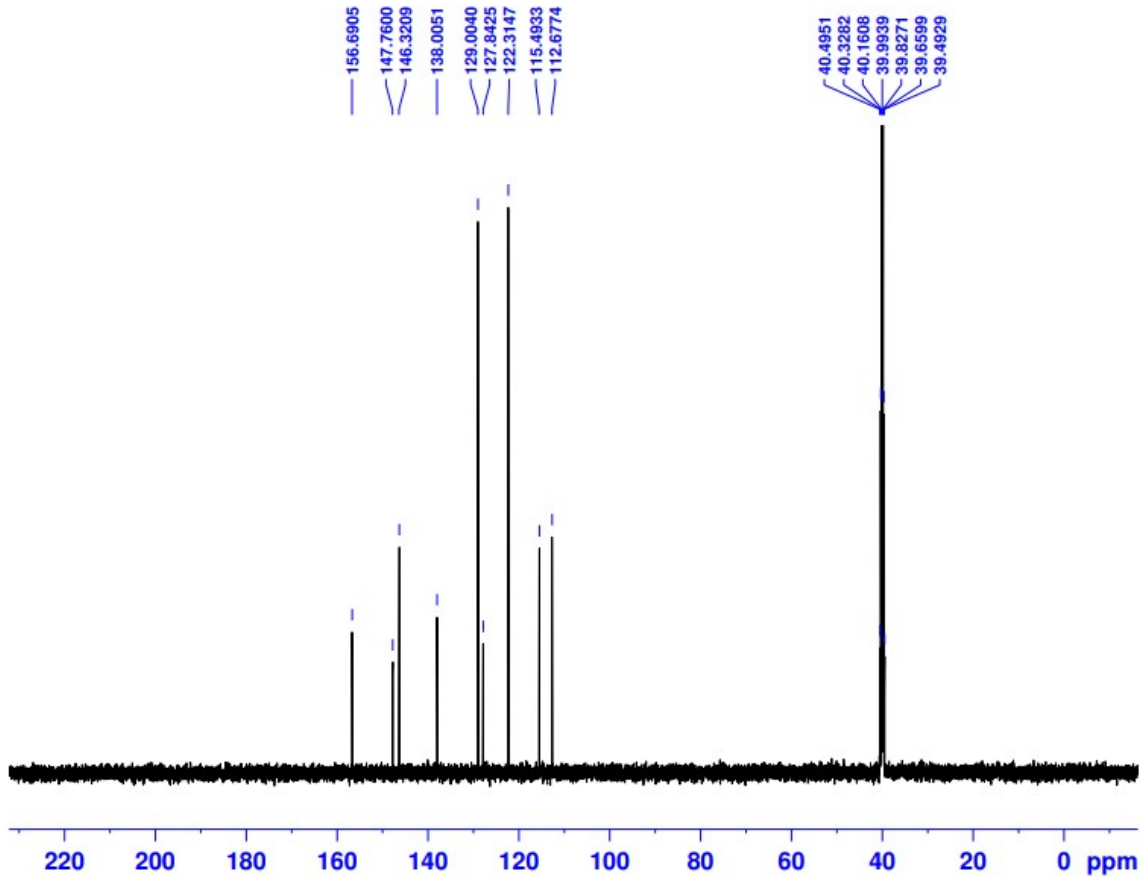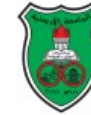

The University of Jordan  
Faculty of Science  
Department of Chemistry

Instrument Model:  
Bruker 500 MHz-Avance III

Operator: Rola Hassouneh  
nmr500@ju.edu.jo

Current Data Parameters  
NAME 19febl5jalal  
EXPNO 2402  
PROCNO 1

F2 - Acquisition Parameters  
Date\_ 20190225  
Time 13.28  
INSTRUM spect  
PROBHD 5 mm PABBO BB/  
PULPROG zgpg30  
TD 65536  
SOLVENT DMSO  
NS 31  
DS 4  
SWH 31250.000 Hz  
FIDRES 0.476837 Hz  
AQ 1.0485760 sec  
RG 202.06  
DM 16.000 usec  
DE 6.50 usec  
TE 298.0 K  
D1 2.00000000 sec  
D11 0.03000000 sec  
TDO 1

===== CHANNEL f1 =====  
SFO1 125.7713681 MHz  
NUC1 13C  
P1 9.80 usec  
PLW1 93.32499695 W

===== CHANNEL f2 =====  
SFO2 500.1320005 MHz  
NUC2 1H  
CPDPRG2 waltz16  
PCPD2 80.00 usec  
PLW2 17.37800026 W  
PLW12 0.36307999 W  
PLW13 0.22982000 W

F2 - Processing parameters  
SI 32768  
SF 125.7577890 MHz  
WDW EM  
SSB 0  
LB 1.00 Hz  
GB 0  
PC 1.50

A6

F2CLAn  
C13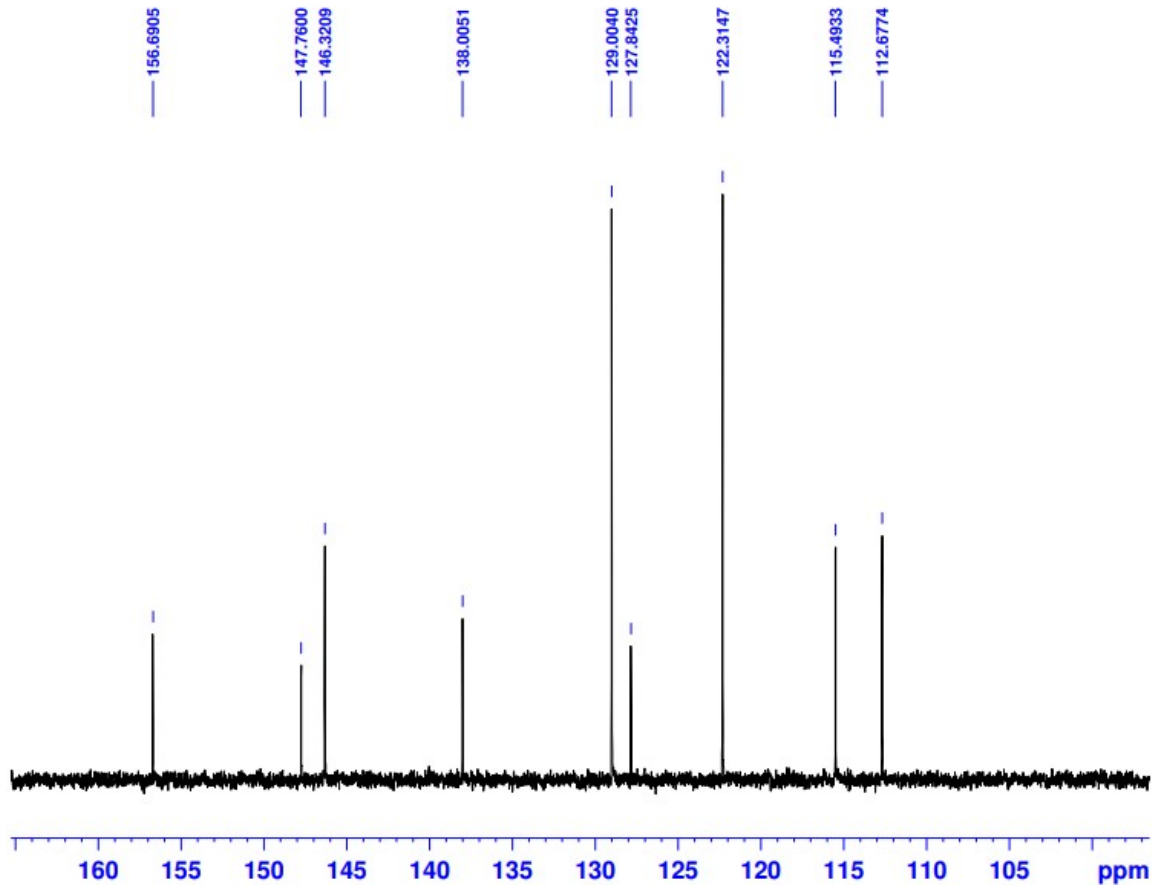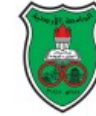

The University of Jordan  
Faculty of Science  
Department of Chemistry

Instrument Model:  
Bruker 500 MHz-Avance III

Operator: Rola Hassouneh  
nmr500@ju.edu.jo

Current Data Parameters  
NAME 19feb15jalal  
EXPNO 2402  
PROCNO 1

F2 - Acquisition Parameters  
Date\_ 20190225  
Time 13.28  
INSTRUM spect  
PROBHD 5 mm PABBO BB/  
PULPROG zgpg30  
TD 65536  
SOLVENT DMSO  
NS 31  
DS 4  
SWH 31250.000 Hz  
FIDRES 0.476837 Hz  
AQ 1.0485760 sec  
RG 202.06  
DW 16.000 usec  
DE 6.50 usec  
TE 298.0 K  
D1 2.0000000 sec  
D11 0.0300000 sec  
TD0 1

===== CHANNEL f1 =====  
SFO1 125.7713681 MHz  
NUC1 13C  
P1 9.80 usec  
PLW1 93.32499695 W

===== CHANNEL f2 =====  
SFO2 500.1320005 MHz  
NUC2 1H  
CPDPRG[2] waltz16  
PCPD2 80.00 usec  
PLW2 17.37800026 W  
PLW12 0.36307999 W  
PLW13 0.22982000 W

F2 - Processing parameters  
SI 32768  
SF 125.7577890 MHz  
WDW EM  
SSB 0  
LB 1.00 Hz  
GB 0  
PC 1.50



A7

F4BuA  
NMR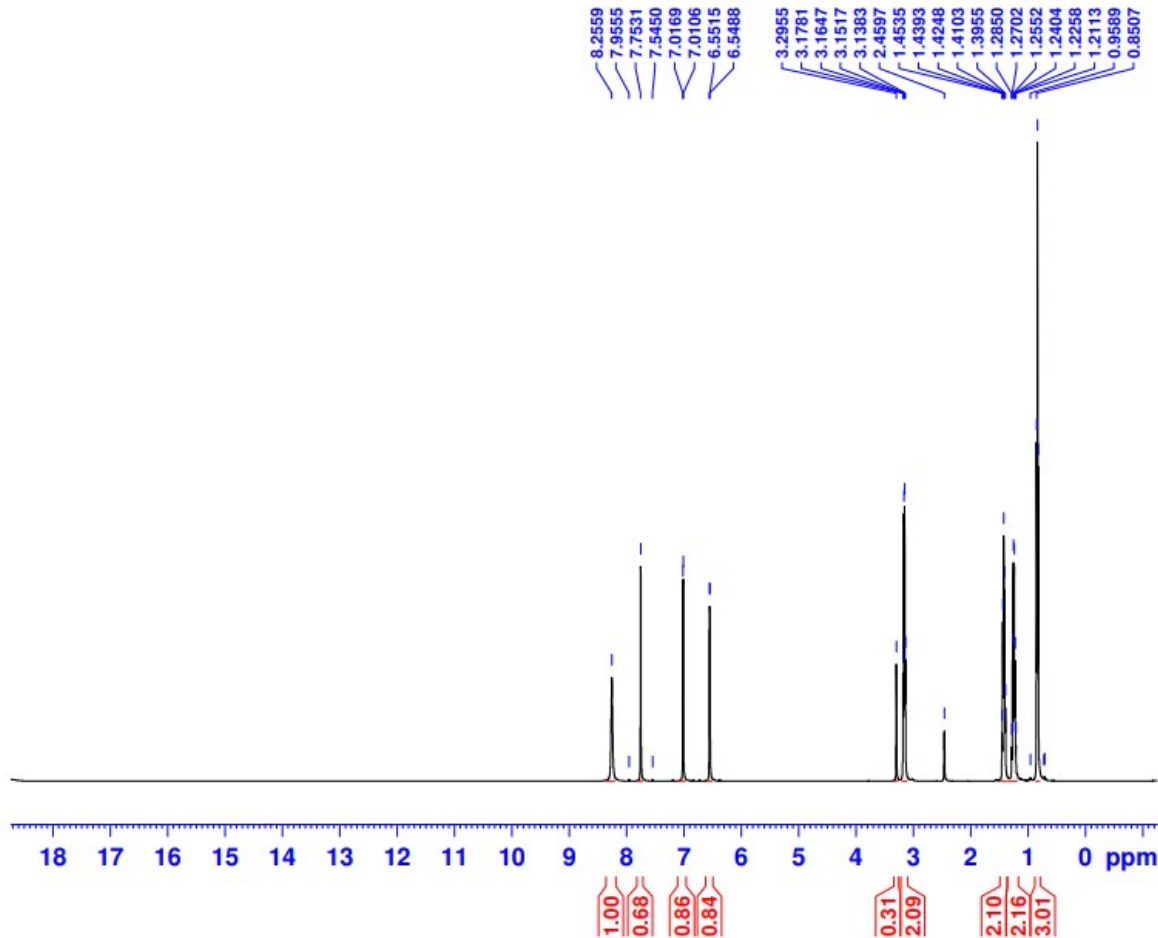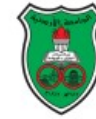

The University of Jordan  
Faculty of Science  
Department of Chemistry

Instrument Model:  
Bruker 500 MHz-Avance III

Operator: Rola Hassouneh  
nmr500@ju.edu.jo

Current Data Parameters  
NAME 19jan01jalal  
EXPNO 721  
PROCNO 1

F2 - Acquisition Parameters  
Date\_ 20190106  
Time 13.50  
INSTRUM spect  
PROBHD 5 mm PABBO BB/  
PULPROG zg  
TD 65536  
SOLVENT DMSO  
NS 4  
DS 0  
SWH 10000.000 Hz  
FIDRES 0.152588 Hz  
AQ 3.2767999 sec  
RG 13.83  
DW 50.000 usec  
DE 6.50 usec  
TE 298.2 K  
D1 2.00000000 sec  
TD0 1

===== CHANNEL f1 =====  
SFO1 500.1343971 MHz  
NUC1 1H  
P1 10.60 usec  
PLW1 17.39999962 W

F2 - Processing parameters  
SI 131072  
SF 500.1300270 MHz  
WDW EM  
SSB 0  
LB 1.00 Hz  
GB 0  
PC 1.00

A7

F4BuA  
NMR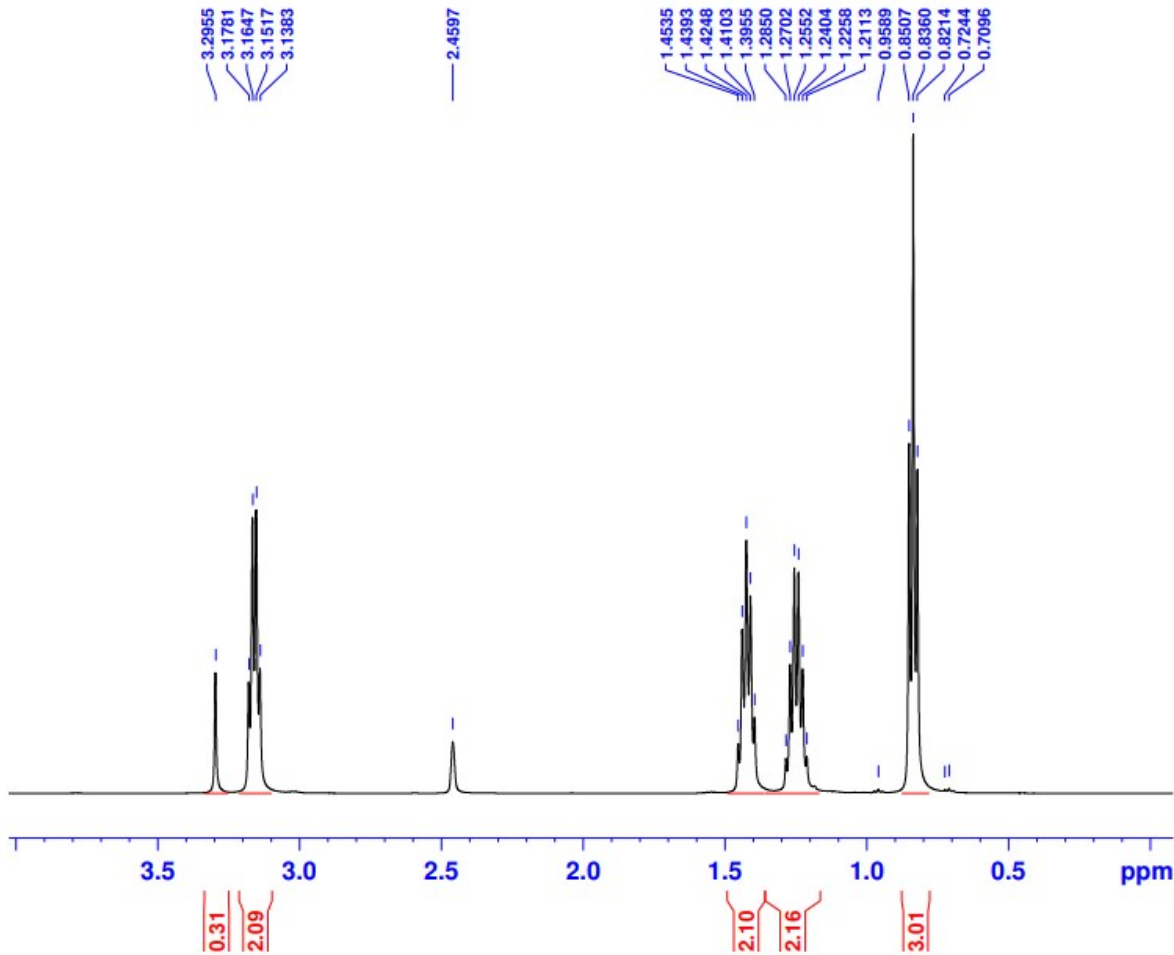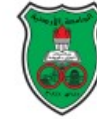

The University of Jordan  
Faculty of Science  
Department of Chemistry

Instrument Model:  
Bruker 500 MHz-Avance III

Operator: Rola Hassouneh  
nmr500@ju.edu.jo

Current Data Parameters  
NAME 19jan01jalal  
EXPNO 721  
PROCNO 1

F2 - Acquisition Parameters  
Date\_ 20190106  
Time 13.50  
INSTRUM spect  
PROBHD 5 mm PABBO BB/  
PULPROG zg  
TD 65536  
SOLVENT DMSO  
NS 4  
DS 0  
SWH 10000.000 Hz  
FIDRES 0.152588 Hz  
AQ 3.2767999 sec  
RG 13.83  
DW 50.000 usec  
DE 6.50 usec  
TE 298.2 K  
D1 2.00000000 sec  
TD0 1

===== CHANNEL f1 =====  
SFO1 500.1343971 MHz  
NUC1 1H  
P1 10.60 usec  
PLW1 17.39999962 W

F2 - Processing parameters  
SI 131072  
SF 500.1300270 MHz  
WDW EM  
SSB 0  
LB 1.00 Hz  
GB 0  
PC 1.00

A7

F4BuA  
NMR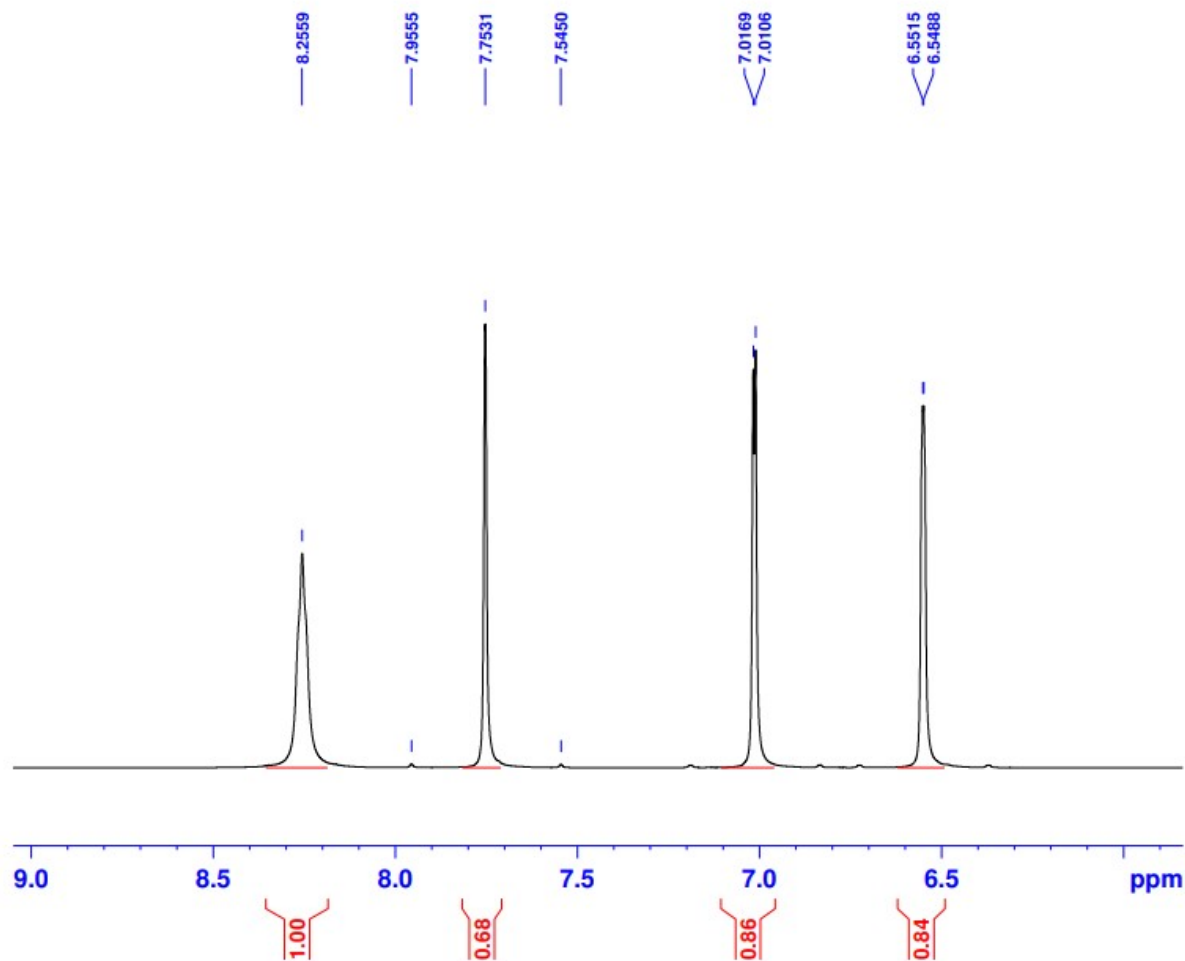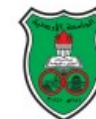

The University of Jordan  
Faculty of Science  
Department of Chemistry

Instrument Model:  
Bruker 500 MHz-Avance III

Operator: Rola Hassouneh  
nmr500@ju.edu.jo

Current Data Parameters  
NAME 19jan01jalal  
EXPNO 721  
PROCNO 1

F2 - Acquisition Parameters  
Date\_ 20190106  
Time 13.50  
INSTRUM spect  
PROBHD 5 mm PABBO BB/  
PULPROG zg  
TD 65536  
SOLVENT DMSO  
NS 4  
DS 0  
SWH 10000.000 Hz  
FIDRES 0.152588 Hz  
AQ 3.2767999 sec  
RG 13.83  
DW 50.000 usec  
DE 6.50 usec  
TE 298.2 K  
D1 2.00000000 sec  
TD0 1

==== CHANNEL f1 =====  
SFO1 500.1343971 MHz  
NUC1 1H  
P1 10.60 usec  
PLW1 17.39999962 W

F2 - Processing parameters  
SI 131072  
SF 500.1300270 MHz  
WDW EM  
SSB 0  
LB 1.00 Hz  
GB 0  
PC 1.00

A7

F4BuA  
C13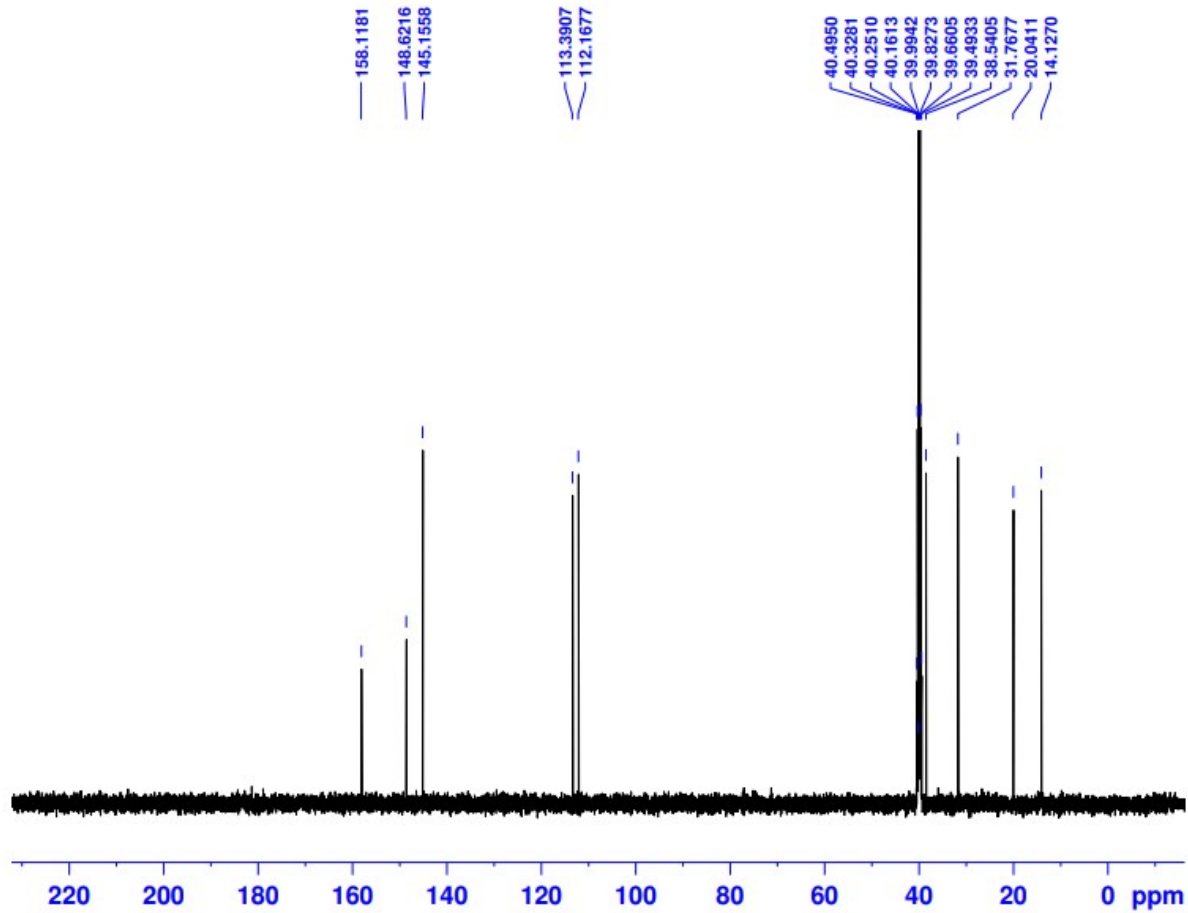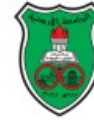

The University of Jordan  
Faculty of Science  
Department of Chemistry

Instrument Model:  
Bruker 500 MHz-Avance III

Operator: Rola Hassouneh  
nmr500@ju.edu.jo

Current Data Parameters  
NAME 19jan01jalal  
EXPNO 722  
PROCNO 1

F2 - Acquisition Parameters  
Date\_ 20190106  
Time 13.52  
INSTRUM spect  
PROBHD 5 mm PABBO BB/  
PULPROG zgpg30  
TD 65536  
SOLVENT DMSO  
NS 35  
DS 4  
SWH 31250.000 Hz  
FIDRES 0.476837 Hz  
AQ 1.0485760 sec  
RG 202.06  
DW 16.000 usec  
DE 6.50 usec  
TE 298.2 K  
D1 2.00000000 sec  
D11 0.03000000 sec  
TDO 1

===== CHANNEL f1 =====  
SFO1 125.7713681 MHz  
NUC1 13C  
P1 9.80 usec  
PLW1 93.32499695 W

===== CHANNEL f2 =====  
SFO2 500.1320005 MHz  
NUC2 1H  
CPDPRG[2] waltz16  
PCPD2 80.00 usec  
PLW2 17.37800026 W  
PLW12 0.36307999 W  
PLW13 0.22982000 W

F2 - Processing parameters  
SI 32768  
SF 125.7577890 MHz  
WDW EM  
SSB 0  
LB 1.00 Hz  
GB 0  
PC 1.50

P 3BP  
NMR

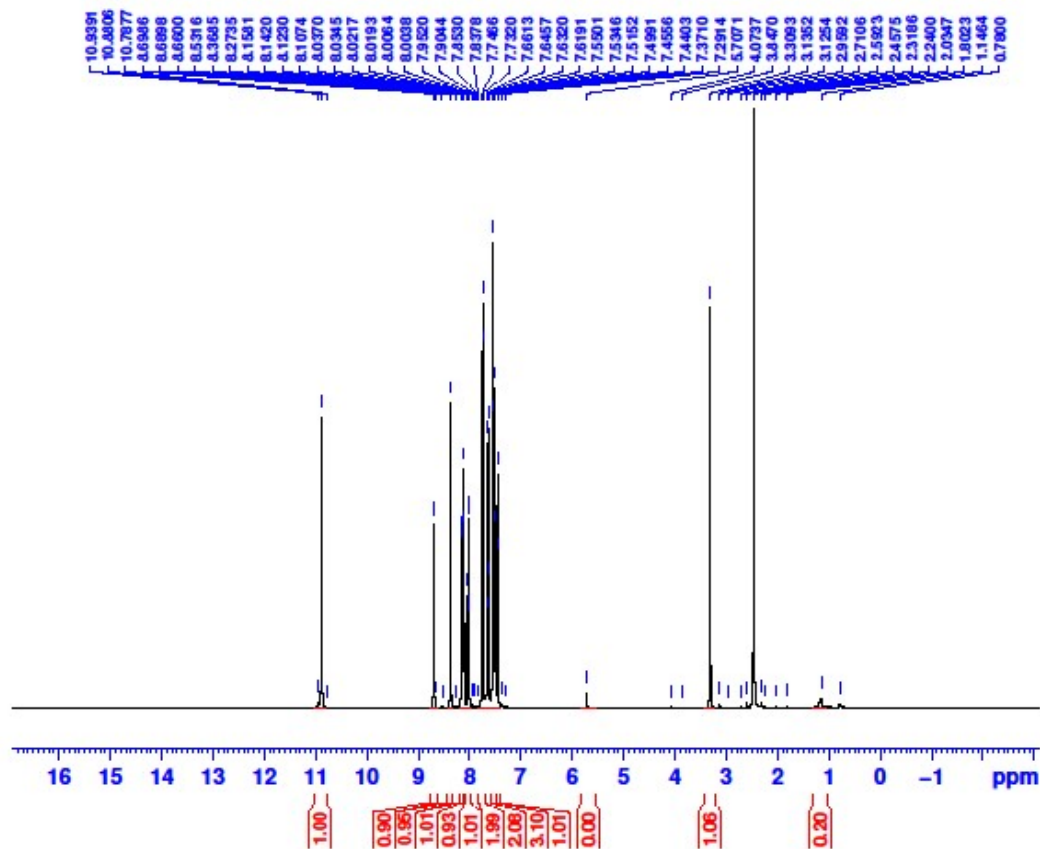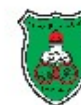

The University of Jordan  
Faculty of Science  
Department of Chemistry

Instrument Model:  
Bruker 500 MHz-Avance III

Operator: Rola Hassouneh  
nmr500@ju.edu.jo

Current Data Parameters  
NAME 19oct01jalal  
EXPNO 1541  
PROCNO 1

F2 - Acquisition Parameters  
Date\_ 20191013  
Time 12.43  
INSTRUM spect  
PROBHD 5 mm PABBO BB/  
PULPROG zg  
TD 65536  
SOLVENT DMSO  
NS 4  
DS 0  
SWH 10000.000 Hz  
FIDRES 0.152588 Hz  
AQ 3.2767999 sec  
RG 31.74  
DW 50.000 usec  
DE 6.50 usec  
TE 299.0 K  
D1 2.00000000 sec  
TD0 1

==== CHANNEL f1 =====  
SFO1 500.1334791 MHz  
NUC1 1H  
P1 10.60 usec  
PLW1 17.39999962 W

F2 - Processing parameters  
SI 131072  
SF 500.1300270 MHz  
WDW EM  
SSB 0  
LB 1.00 Hz  
GB 0  
PC 1.00

A11

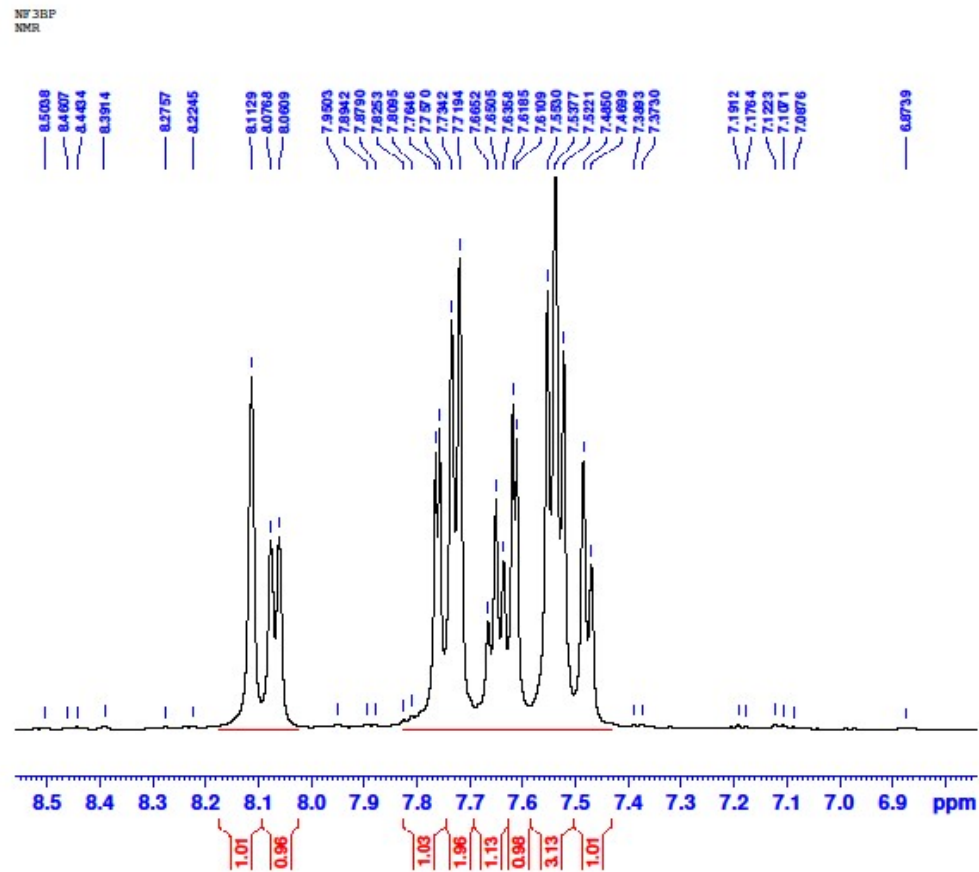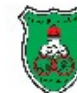

The University of Jordan  
Faculty of Science  
Department of Chemistry

Instrument Model  
Bruker 500 MHz–Avance III

Operator: Rola Hassouneh  
nmr500@ju.edu.jo

Current Data Parameters  
NAME 19oct01jalal  
EXPNO 1591  
PROCNO 1

F2 - Acquisition Parameters  
Date\_ 20191013  
Time 13.35  
INSTRUM spect  
PROBHD 5 mm PABBO BB/  
PULPROG zg  
TD 65536  
SOLVENT DMSO  
NS 4  
DS 0  
SWH 10000.000 Hz  
FIDRES 0.152588 Hz  
AQ 3.2767999 sec  
RG 22.83  
DW 50.000 usec  
DE 6.50 usec  
TE 299.0 K  
D1 2.00000000 sec  
TD0 1

==== CHANNEL f1 =====  
SFO1 500.1334791 MHz  
NUC1 1H  
P1 10.60 usec  
PLW1 17.39999962 W

F2 - Processing parameters  
SI 131072  
SF 500.1300270 MHz  
WDW EM  
SSB 0  
LB 1.00 Hz  
GB 0  
PC 1.00

A11

NR3BP  
NMR

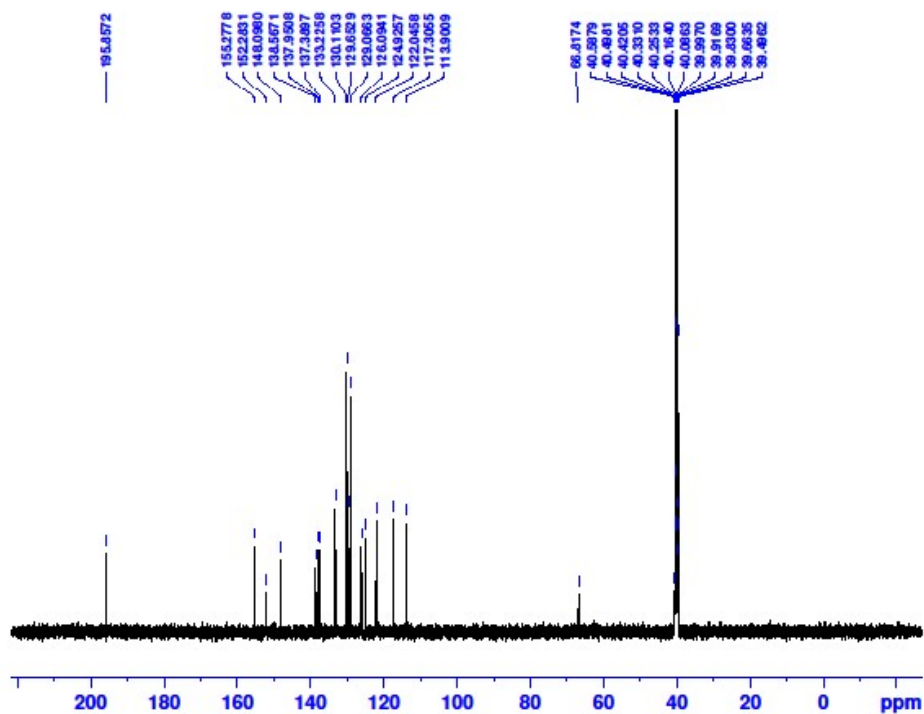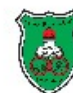

The University of Jordan  
Faculty of Science  
Department of Chemistry

Instrument Model:  
Bruker 500 MHz-Avance III

Operator: Rola Hassouneh  
nmr500@ju.edu.jo

Current Data Parameters  
NAME 19oct01jalal  
EXPNO 1592  
PROCNO 1

F2 - Acquisition Parameters  
Date\_ 20191013  
Time 13.36  
INSTRUM spect  
PROBHD 5 mm PABBO BB/  
PULPROG zgpg30  
TD 65536  
SOLVENT dmsc  
NS 37  
DS 4  
SWH 31250.000 Hz  
FIDRES 0.476837 Hz  
AQ 1.0485760 sec  
RG 202.06  
IN 16.000 usec  
DE 6.50 usec  
TE 299.1 K  
D1 2.00000000 sec  
D11 0.53000000 sec  
TD0 1

----- CHANNEL F1 -----  
SFO1 125.7700308 MHz  
NUC1 13C  
P1 10.00 usec  
PLW1 96.27500153 W

----- CHANNEL F2 -----  
SFO2 500.1320005 MHz  
NUC2 1H  
CPOPRG2 waltz16  
PCPD2 80.00 usec  
PLW2 13.3239995 W  
PLW12 0.29978001 W  
PLW13 0.15079001 W

F2 - Processing parameters  
SI 32768  
SF 125.7577890 MHz  
WDW EM  
SSB 0  
LB 1.00 Hz  
GB 0  
PC 1.50

B1

F4OH  
HNMR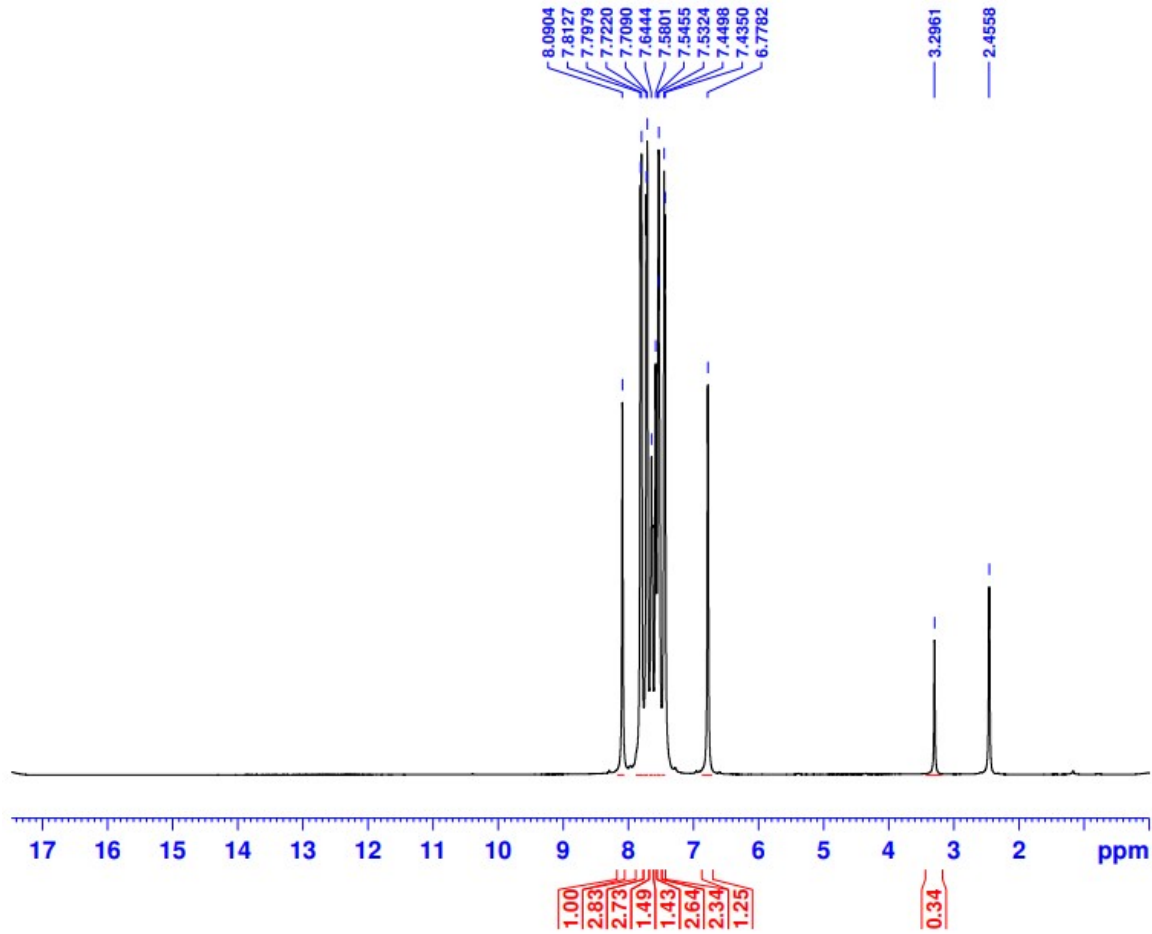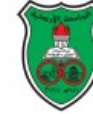

The University of Jordan  
Faculty of Science  
Department of Chemistry

Instrument Model:  
Bruker 500 MHz-Avance III

Operator: Rola Hassounch  
nmr500@ju.edu.jo

Current Data Parameters  
NAME 18oct01jalal  
EXPNO 321  
PROCNO 1

F2 - Acquisition Parameters  
Date\_ 20181003  
Time 10.35  
INSTRUM spect  
PROBHD 5 mm PABBO BB/  
PULPROG zg  
TD 65536  
SOLVENT DMSO  
NS 4  
DS 0  
SWH 8741.259 Hz  
FIDRES 0.133381 Hz  
AQ 3.7486591 sec  
RG 31.74  
DW 57.200 usec  
DE 6.50 usec  
TE 298.0 K  
D1 2.00000000 sec  
TD0 1

===== CHANNEL f1 =====  
SF01 500.1343971 MHz  
NUC1 1H  
P1 10.60 usec  
PLW1 17.39999962 W

F2 - Processing parameters  
SI 131072  
SF 500.1300270 MHz  
WDW EM  
SSB 0  
LB 1.00 Hz  
GB 0  
PC 5.00



B1

F4OH  
HNMR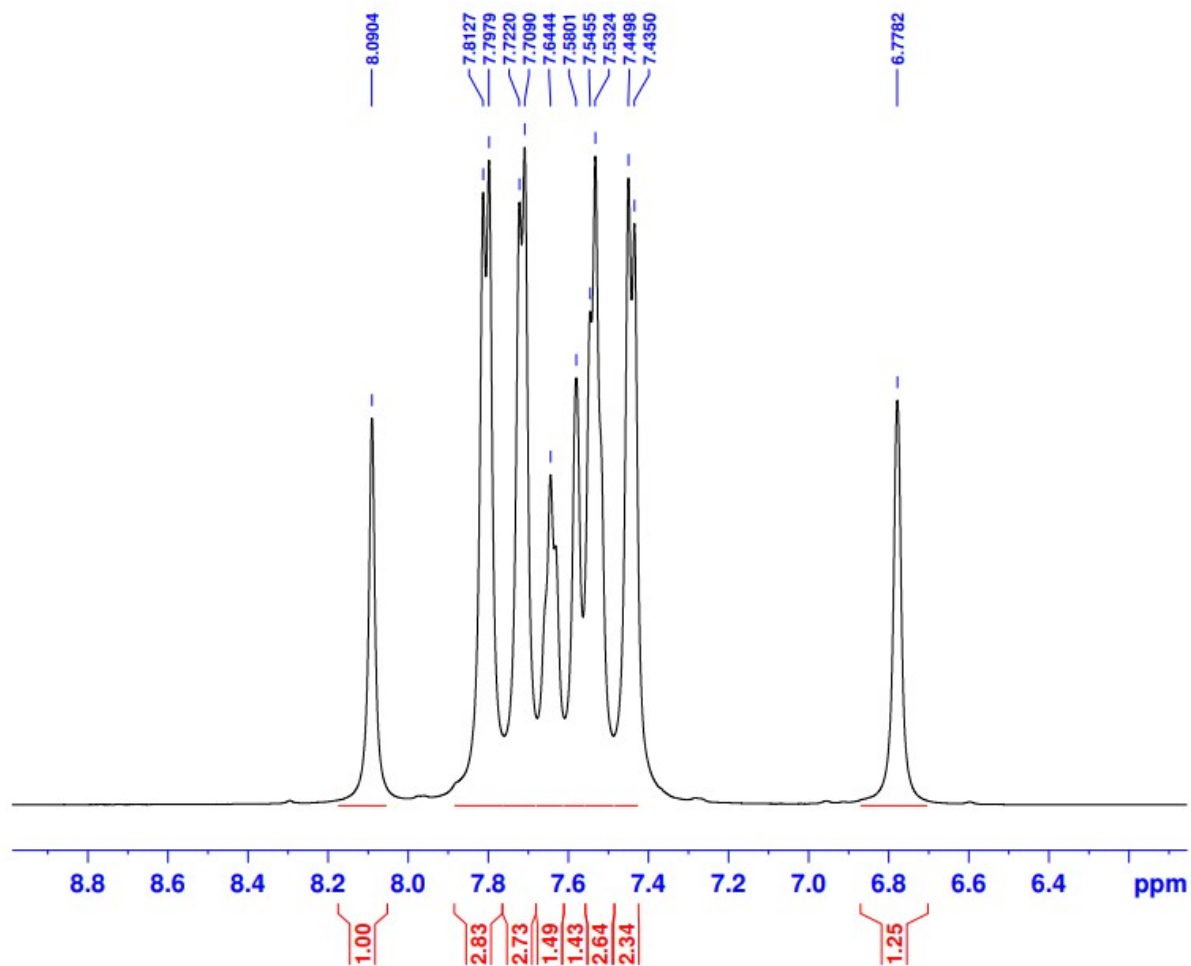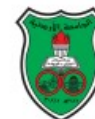

The University of Jordan  
Faculty of Science  
Department of Chemistry

Instrument Model:  
Bruker 500 MHz-Avance III

Operator: Rola Hassouneh  
nmr500@ju.edu.jo

Current Data Parameters  
NAME 18oct01jalal  
EXPNO 321  
PROCNO 1

F2 - Acquisition Parameters  
Date\_ 20181003  
Time 10.35  
INSTRUM spect  
PROBHD 5 mm PABBO BB/  
PULPROG zg  
TD 65536  
SOLVENT DMSO  
NS 4  
DS 0  
SWH 8741.259 Hz  
FIDRES 0.133381 Hz  
AQ 3.7486591 sec  
RG 31.74  
DW 57.200 usec  
DE 6.50 usec  
TE 298.0 K  
D1 2.00000000 sec  
TD0 1

===== CHANNEL f1 =====  
SFO1 500.1343971 MHz  
NUC1 1H  
P1 10.60 usec  
PLW1 17.39999962 W

F2 - Processing parameters  
SI 131072  
SF 500.1300270 MHz  
WDW EM  
SSB 0  
LB 1.00 Hz  
GB 0  
PC 5.00

B1

F4OH  
C13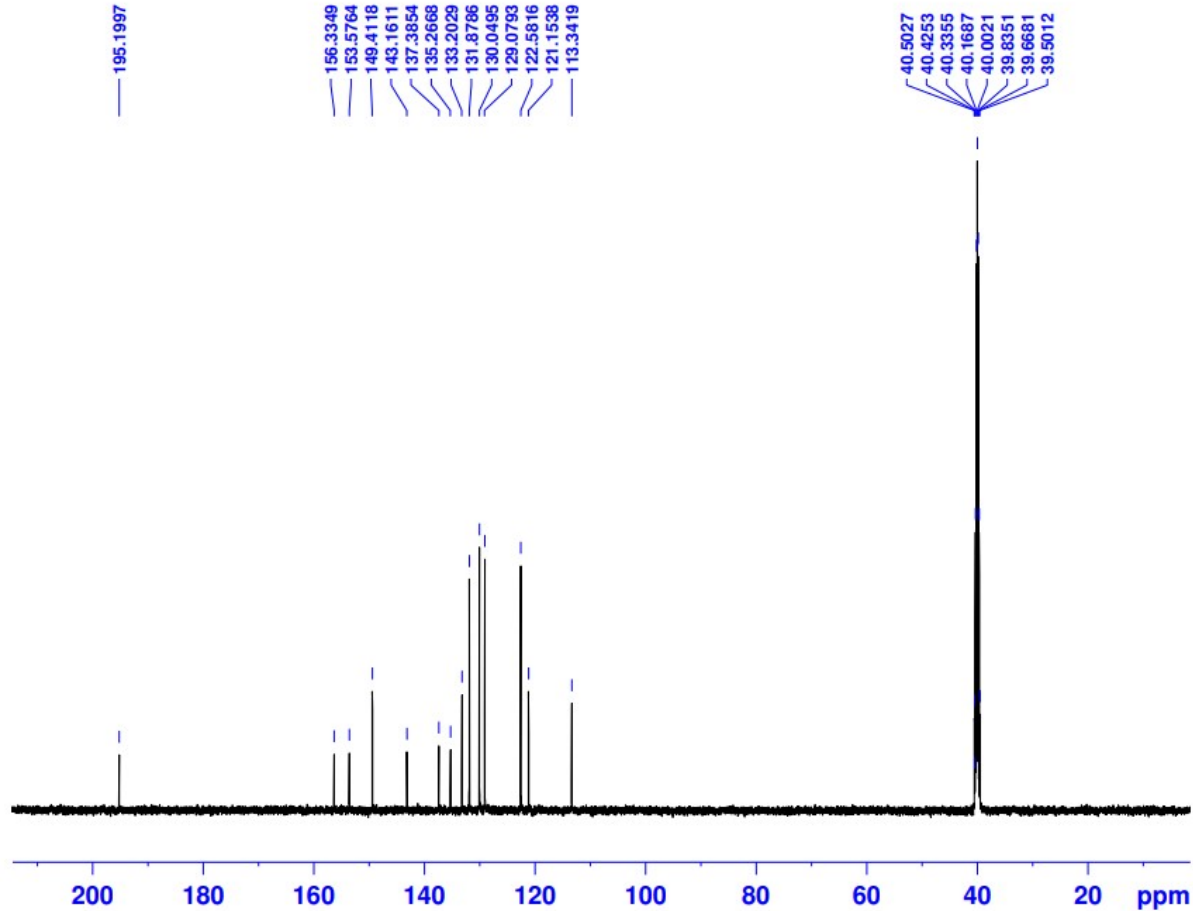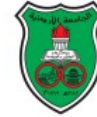

The University of Jordan  
Faculty of Science  
Department of Chemistry

Instrument Model:  
Bruker 500 MHz-Avance

Operator: Rola Hassouneh  
nmr500@ju.edu.jo

Current Data Parameters  
NAME 18oct01jalal  
EXPNO 322  
PROCNO 1

F2 - Acquisition Parameters  
Date\_ 20181003  
Time 10.41  
INSTRUM spect  
PROBHD 5 mm PABBO BB/  
PULPROG zgpg30  
TD 65536  
SOLVENT DMSO  
NS 116  
DS 4  
SWH 26785.715 Hz  
FIDRES 0.408718 Hz  
AQ 1.2233387 sec  
RG 202.06  
DW 18.667 usec  
DE 6.50 usec  
TE 298.0 K  
D1 2.00000000 sec  
D11 0.03000000 sec  
TD0 1

----- CHANNEL f1 -----  
SFO1 125.7713681 MHz  
NUC1 13C  
P1 9.80 usec  
PLW1 93.32499695 W

----- CHANNEL f2 -----  
SFO2 500.1320005 MHz  
NUC2 1H  
CPDPRG[2] waltz16  
PCPD2 80.00 usec  
PLW2 17.37800026 W  
PLW12 0.36307999 W  
PLW13 0.22982000 W

F2 - Processing parameters  
SI 32768  
SF 125.7577890 MHz  
WDW EM  
SSB 0  
LB 1.00 Hz  
GB 0  
PC 1.40

B1

F4OH  
dept135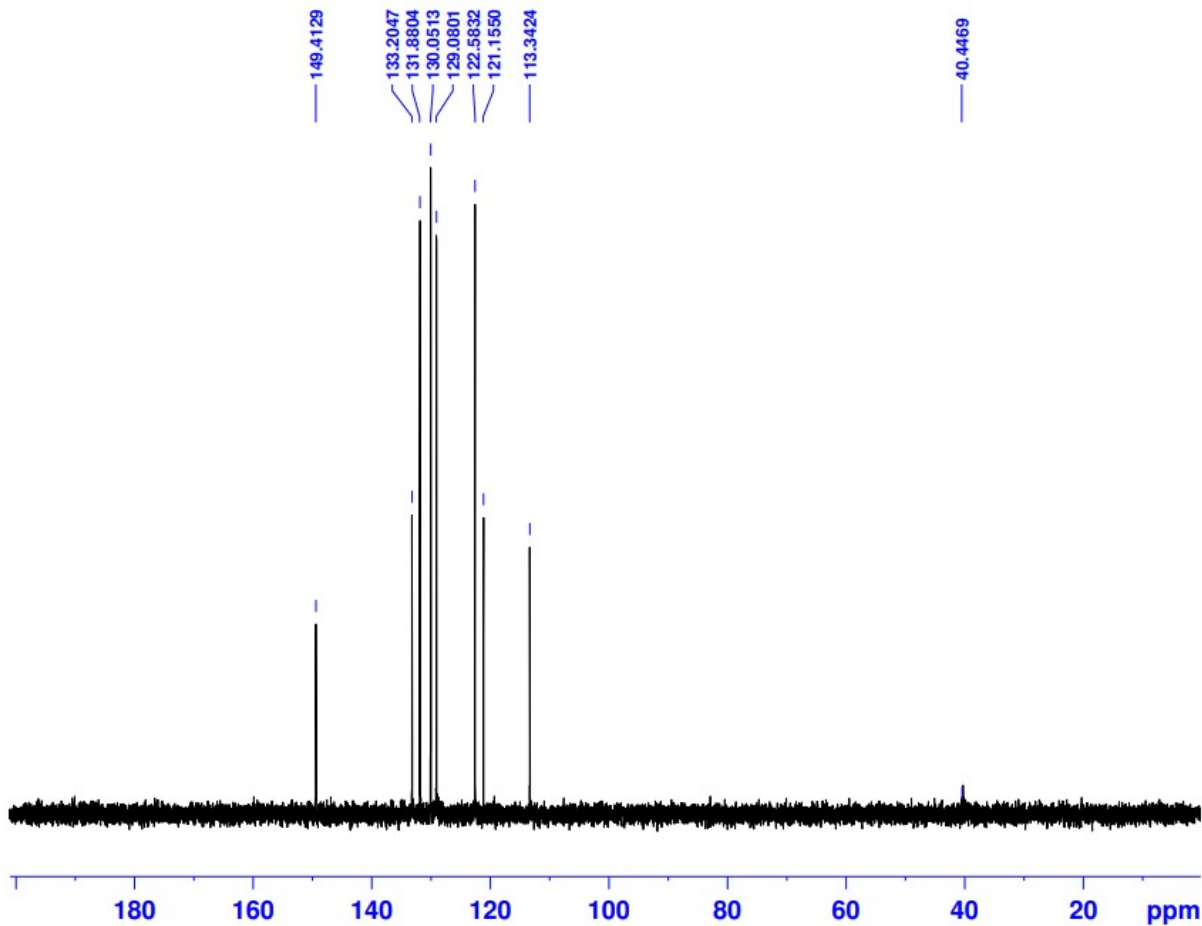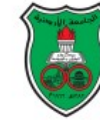

The University of Jordan  
Faculty of Science  
Department of Chemistry

Instrument Model:  
Bruker 500 MHz-Avance III

Operator: Rola Hassouneh  
nmr500@ju.edu.jo

Current Data Parameters  
NAME 18oct01jalal  
EXPNO 323  
PROCNO 1

F2 - Acquisition Parameters  
Date\_ 20181003  
Time 10.44  
INSTRUM spect  
PROBHD 5 mm PABBO BB/  
PULPROG deptsp135  
TD 65536  
SOLVENT DMSO  
NS 66  
DS 4  
SMH 25252.525 Hz  
FIDRES 0.385323 Hz  
AQ 1.2976128 sec  
RG 202.06  
DM 19.800 usec  
DE 6.50 usec  
TE 298.0 K  
CNST2 145.0000000  
D1 2.00000000 sec  
D2 0.30344828 sec  
D12 0.00002000 sec  
TD0 1

===== CHANNEL f1 =====  
SFO1 125.770414 MHz  
NUC1 13C  
P1 9.80 usec  
P13 2000.00 usec  
PLM0 0 W  
PLM1 93.32499695 W  
SPNAM[5] Crp60comp.4  
SPOALS 0.500  
SPOFFS5 0 Hz  
SPW5 13.69400024 W

===== CHANNEL f2 =====  
SFO2 500.1315995 MHz  
NUC2 1H  
CFDPRG[2] waltz16  
P3 11.50 usec  
P4 23.00 usec  
PCPD2 80.00 usec  
PLW2 17.37800026 W  
PLW12 0.36307999 W

F2 - Processing parameters  
SI 32768  
SF 125.7577890 MHz  
WDW EM  
SSB 0  
LB 1.00 Hz

B2

F2ohap  
NMR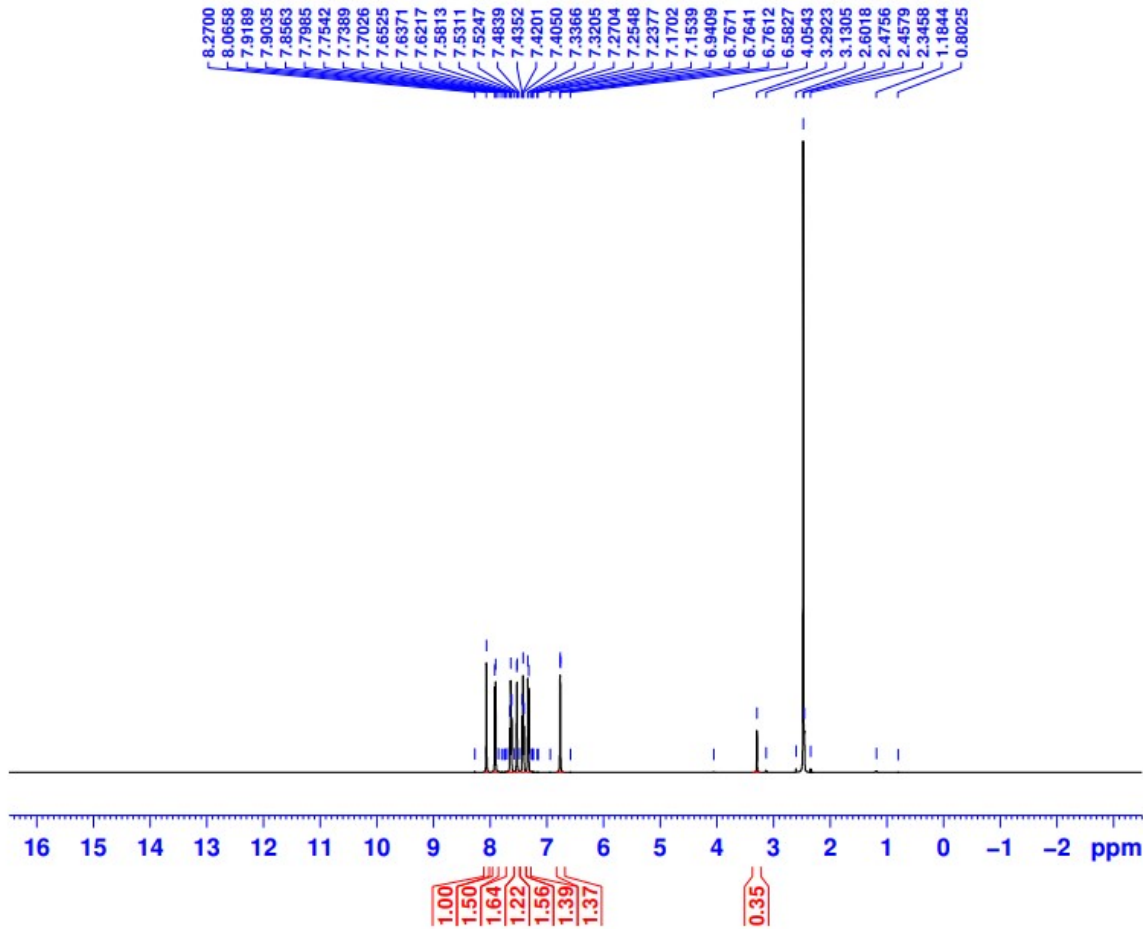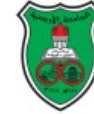

The University of Jordan  
Faculty of Science  
Department of Chemistry

Instrument Model:  
Bruker 500 MHz-Avance III

Operator: Rola Hassouneh  
nmr500@ju.edu.jo

Current Data Parameters  
NAME 19feb15jalal  
EXPNO 2391  
PROCNO 1

F2 - Acquisition Parameters  
Date\_ 20190225  
Time 13.22  
INSTRUM spect  
PROBHD 5 mm PABBO BB/  
PULPROG zg  
TD 65536  
SOLVENT DMSO  
NS 4  
DS 0  
SWH 10000.000 Hz  
FIDRES 0.152588 Hz  
AQ 3.2767999 sec  
RG 43.6  
DW 50.000 usec  
DE 6.50 usec  
TE 298.0 K  
D1 2.00000000 sec  
TD0 1

===== CHANNEL f1 =====  
SFO1 500.1332736 MHz  
NUC1 1H  
P1 10.60 usec  
PLW1 17.39999962 W

F2 - Processing parameters  
SI 131072  
SF 500.1300270 MHz  
WDW EM  
SSB 0  
LB 1.00 Hz  
GB 0  
PC 1.00

B2

F2ohap  
C13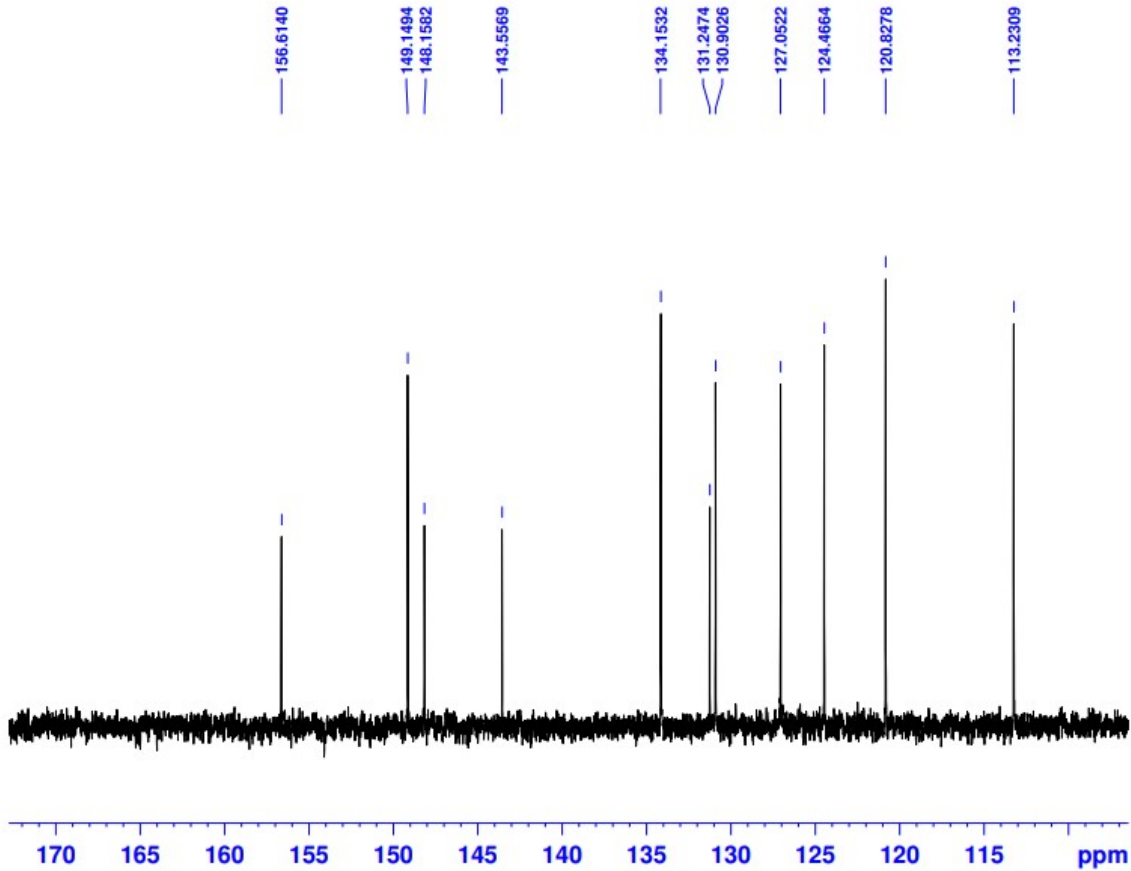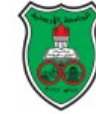

The University of Jordan  
Faculty of Science  
Department of Chemistry

Instrument Model:  
Bruker 500 MHz-Avance III

Operator: Rola Hassouneh  
nmr500@ju.edu.jo

Current Data Parameters  
NAME 19febl5jalal  
EXPNO 2392  
PROCNO 1

F2 - Acquisition Parameters  
Date\_ 20190225  
Time 13.23  
INSTRUM spect  
PROBHD 5 mm PABBO BB/  
PULPROG zgpg30  
TD 65536  
SOLVENT DMSO  
NS 25  
DS 4  
SWH 31250.000 Hz  
FIDRES 0.476837 Hz  
AQ 1.0485760 sec  
RG 202.06  
DW 16.000 usec  
DE 6.50 usec  
TE 298.1 K  
D1 2.00000000 sec  
D11 0.03000000 sec  
TD0 1

===== CHANNEL f1 =====  
SFO1 125.7713681 MHz  
NUC1 13C  
P1 9.80 usec  
PLW1 93.32499695 W

===== CHANNEL f2 =====  
SFO2 500.1320005 MHz  
NUC2 1H  
CPDPRG2 waltz16  
PCPD2 80.00 usec  
PLW2 17.37800026 W  
PLW12 0.36307999 W  
PLW13 0.22982000 W

F2 - Processing parameters  
SI 32768  
SF 125.7577890 MHz  
WDW EM  
SSB 0  
LB 1.00 Hz  
GB 0  
PC 1.50

B2

F2ohap  
C13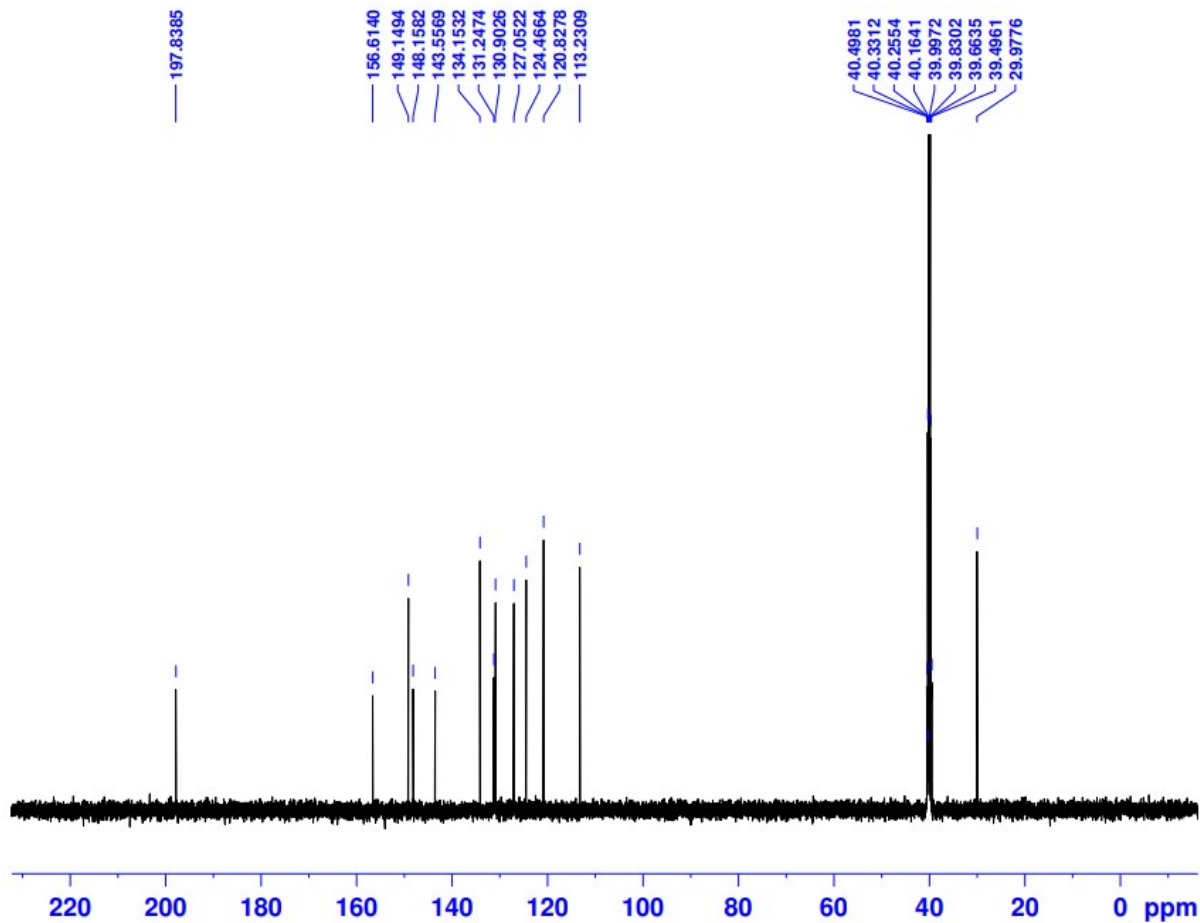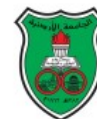

The University of Jordan  
Faculty of Science  
Department of Chemistry

Instrument Model:  
Bruker 500 MHz-Avance III

Operator: Rola Hassouneh  
nmr500@ju.edu.jo

Current Data Parameters  
NAME 19feb15jalal  
EXPNO 2392  
PROCNO 1

F2 - Acquisition Parameters  
Date\_ 20190225  
Time 13.23  
INSTRUM spect  
PROBHD 5 mm PABBO BB/  
PULPROG zgpg30  
TD 65536  
SOLVENT DMSO  
NS 25  
DS 4  
SWH 31250.000 Hz  
FIDRES 0.476837 Hz  
AQ 1.0485760 sec  
RG 202.06  
DW 16.000 usec  
DE 6.50 usec  
TE 298.1 K  
D1 2.00000000 sec  
D11 0.03000000 sec  
TD0 1

----- CHANNEL f1 -----  
SFO1 125.7713681 MHz  
NUC1 13C  
P1 9.80 usec  
PLW1 93.32499695 W

----- CHANNEL f2 -----  
SFO2 500.1320005 MHz  
NUC2 1H  
CPDPRG2 waltz16  
PCPD2 80.00 usec  
PLW2 17.37800026 W  
PLW12 0.36307999 W  
PLW13 0.22982000 W

F2 - Processing parameters  
SI 32768  
SF 125.7577890 MHz  
WDW EM  
SSB 0  
LB 1.00 Hz

B3

f2ph  
NMR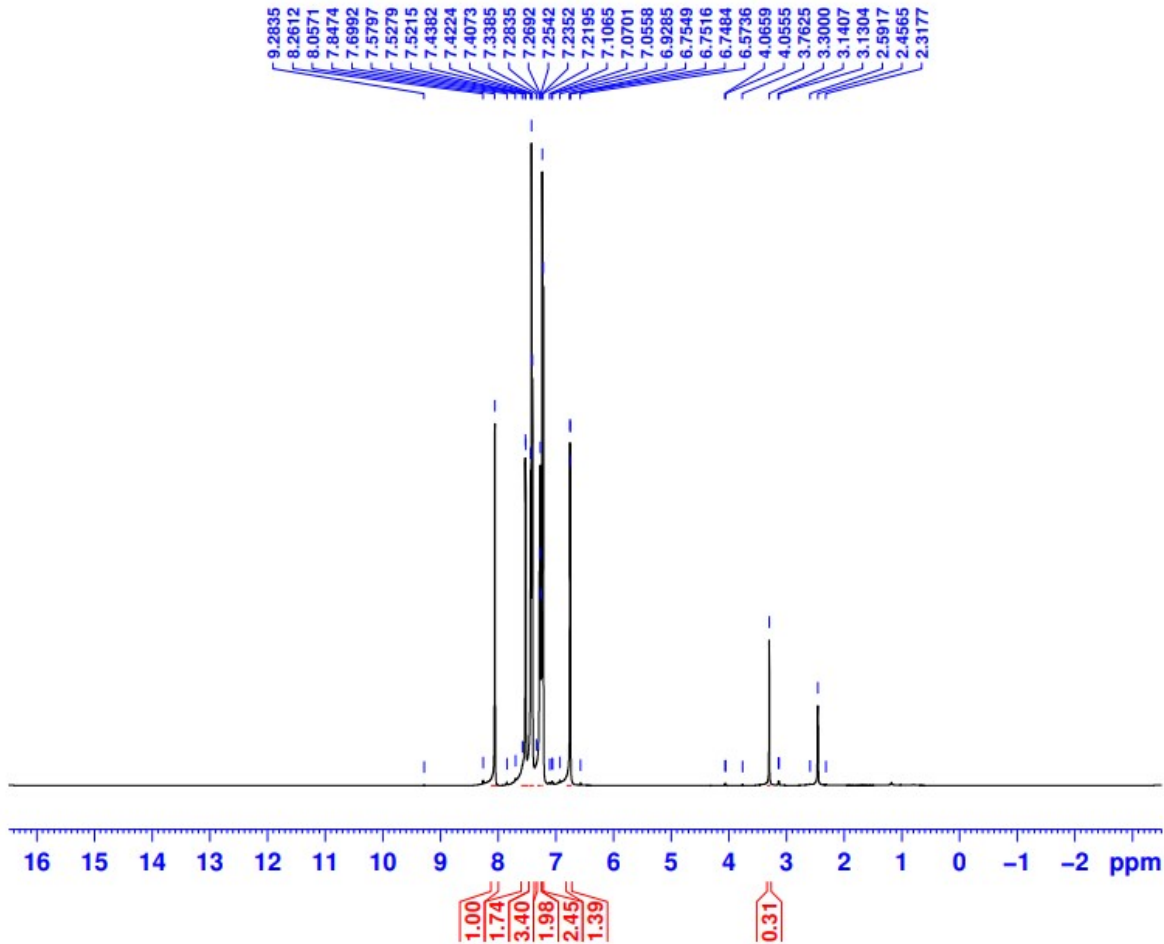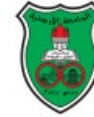

The University of Jordan  
Faculty of Science  
Department of Chemistry

Instrument Model:  
Bruker 500 MHz-Avance III

Operator: Rola Hassouneh  
nmr500@ju.edu.jo

Current Data Parameters  
NAME 19feb15jalal  
EXPNO 1981  
PROCNO 1

F2 - Acquisition Parameters  
Date\_ 20190224  
Time 12.39  
INSTRUM spect  
PROBHD 5 mm PABBO BB/  
PULPROG zg  
TD 65536  
SOLVENT DMSO  
NS 4  
DS 0  
SWH 10000.000 Hz  
FIDRES 0.152588 Hz  
AQ 3.2767999 sec  
RG 71.89  
DW 50.000 usec  
DE 6.50 usec  
TE 298.0 K  
D1 2.00000000 sec  
TDO 1

===== CHANNEL f1 =====  
SFO1 500.1332736 MHz  
NUC1 1H  
P1 10.60 usec  
PLW1 17.39999962 W

F2 - Processing parameters  
SI 131072  
SF 500.1300270 MHz  
WDW EM  
SSB 0  
LB 1.00 Hz  
GB 0  
PC 1.00

B3

f2ph  
NMR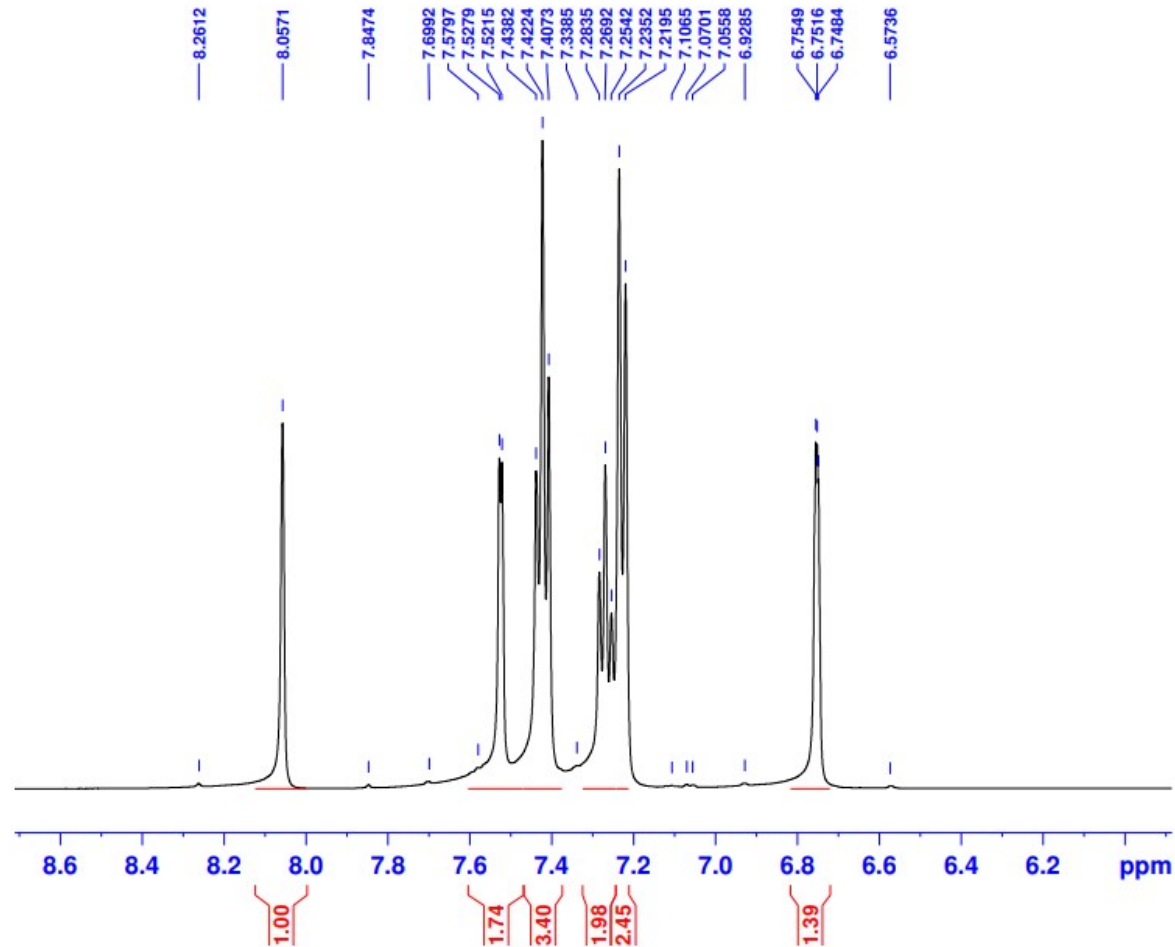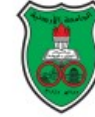

The University of Jordan  
Faculty of Science  
Department of Chemistry

Instrument Model:  
Bruker 500 MHz-Avance III

Operator: Rola Hassounh  
nmr500@ju.edu.jo

Current Data Parameters  
NAME 19feb15jalal  
EXPNO 1981  
PROCNO 1

F2 - Acquisition Parameters  
Date\_ 20190224  
Time 12.39  
INSTRUM spect  
PROBHD 5 mm PABBO BB/  
PULPROG zg  
TD 65536  
SOLVENT DMSO  
NS 4  
DS 0  
SWH 10000.000 Hz  
FIDRES 0.152588 Hz  
AQ 3.2767999 sec  
RG 71.89  
DW 50.000 usec  
DE 6.50 usec  
TE 298.0 K  
D1 2.00000000 sec  
TD0 1

===== CHANNEL f1 =====  
SFO1 500.1332736 MHz  
NUC1 1H  
P1 10.60 usec  
PLW1 17.39999962 W

F2 - Processing parameters  
SI 131072  
SF 500.1300270 MHz  
WDW EM  
SSB 0  
LB 1.00 Hz  
GB 0  
PC 1.00



B3

f2ph  
C13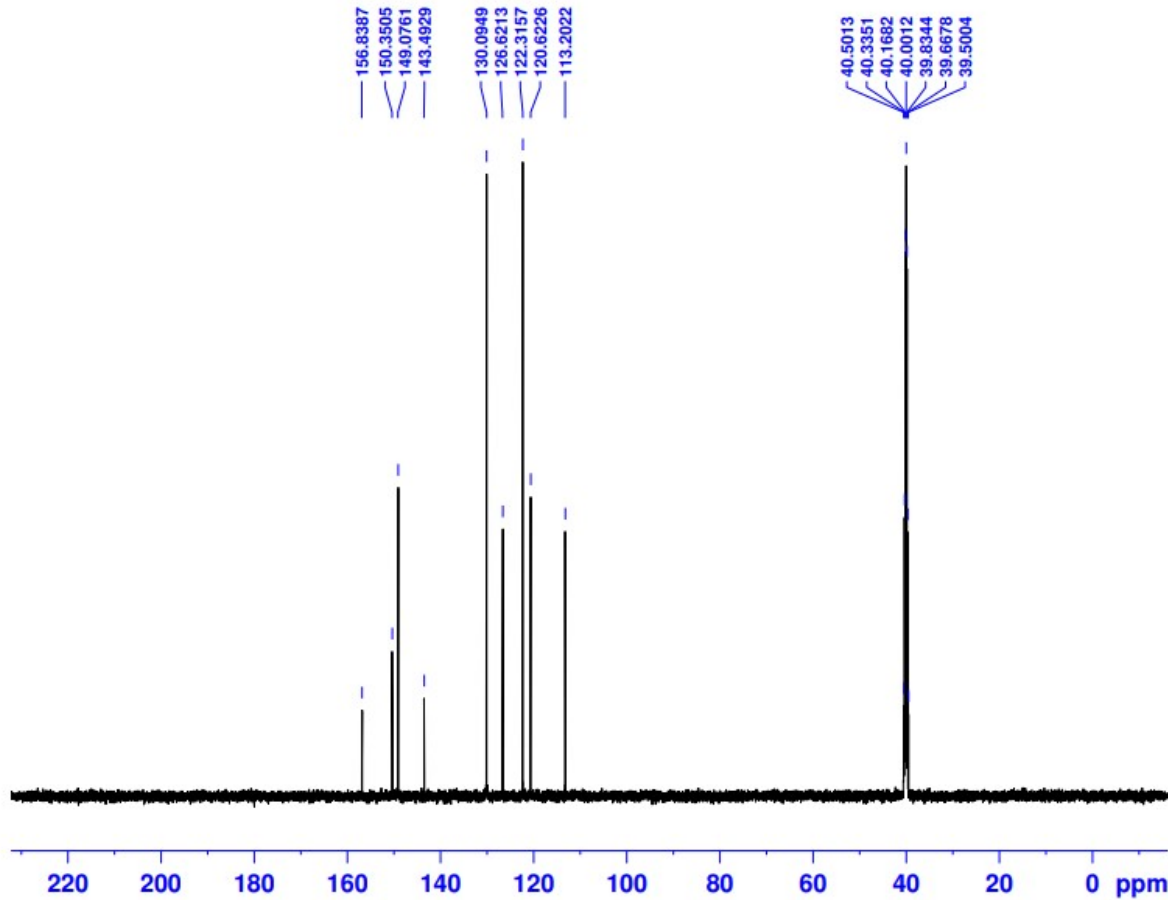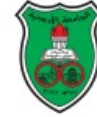

The University of Jordan  
Faculty of Science  
Department of Chemistry

Instrument Model:  
Bruker 500 MHz-Avance III

Operator: Rola Hassouneh  
nmr500@ju.edu.jo

Current Data Parameters  
NAME 19feb15jalal  
EXPNO 1982  
PROCNO 1

F2 - Acquisition Parameters  
Date\_ 20190224  
Time 12.42  
INSTRUM spect  
PROBHD 5 mm PABBO BB/  
PULPROG zgpg30  
TD 65536  
SOLVENT DMSO  
NS 66  
DS 4  
SWH 31250.000 Hz  
FIDRES 0.476837 Hz  
AQ 1.0485760 sec  
RG 202.06  
DW 16.000 usec  
DE 6.50 usec  
TE 298.0 K  
D1 2.00000000 sec  
D11 0.03000000 sec  
TD0 1

===== CHANNEL f1 =====  
SFO1 125.7713681 MHz  
NUC1 13C  
P1 9.80 usec  
PLW1 93.32499695 W

===== CHANNEL f2 =====  
SFO2 500.1320005 MHz  
NUC2 1H  
CPDPRG[2] waltz16  
PCPD2 80.00 usec  
PLW2 17.37800026 W  
PLW12 0.36307999 W  
PLW13 0.22982000 W

F2 - Processing parameters  
SI 32768  
SF 125.7577890 MHz  
WDW EM  
SSB 0  
LB 1.00 Hz  
GB 0  
PC 1.50

B4

F2Dmph  
NMR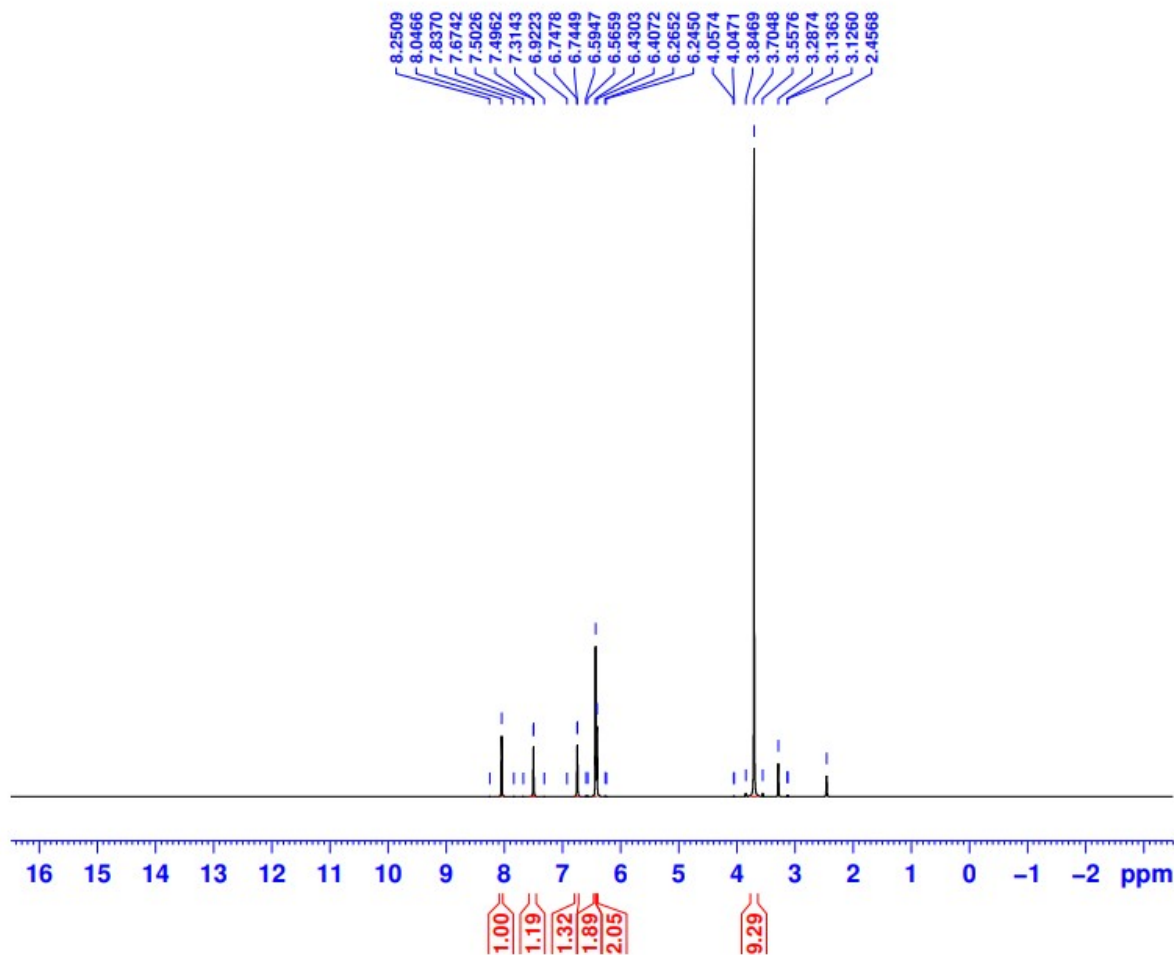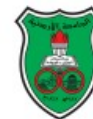

The University of Jordan  
Faculty of Science  
Department of Chemistry

Instrument Model:  
Bruker 500 MHz-Avance III

Operator: Rola Hassouneh  
nmr500@ju.edu.jo

Current Data Parameters  
NAME 19feb15jalal  
EXPNO 2411  
PROCNO 1

F2 - Acquisition Parameters  
Date\_ 20190225  
Time 13.31  
INSTRUM spect  
PROBHD 5 mm PABBO BB/  
PULPROG zg  
TD 65536  
SOLVENT DMSO  
NS 4  
DS 0  
SWH 10000.000 Hz  
FIDRES 0.152588 Hz  
AQ 3.2767999 sec  
RG 43.6  
DW 50.000 usec  
DE 6.50 usec  
TE 298.0 K  
D1 2.00000000 sec  
TD0 1

===== CHANNEL f1 =====  
SFO1 500.1332736 MHz  
NUC1 1H  
P1 10.60 usec  
PLW1 17.39999962 W

F2 - Processing parameters  
SI 131072  
SF 500.1300270 MHz  
WDW EM  
SSB 0  
LB 1.00 Hz  
GB 0  
PC 1.00

B4

F2Dmph  
NMR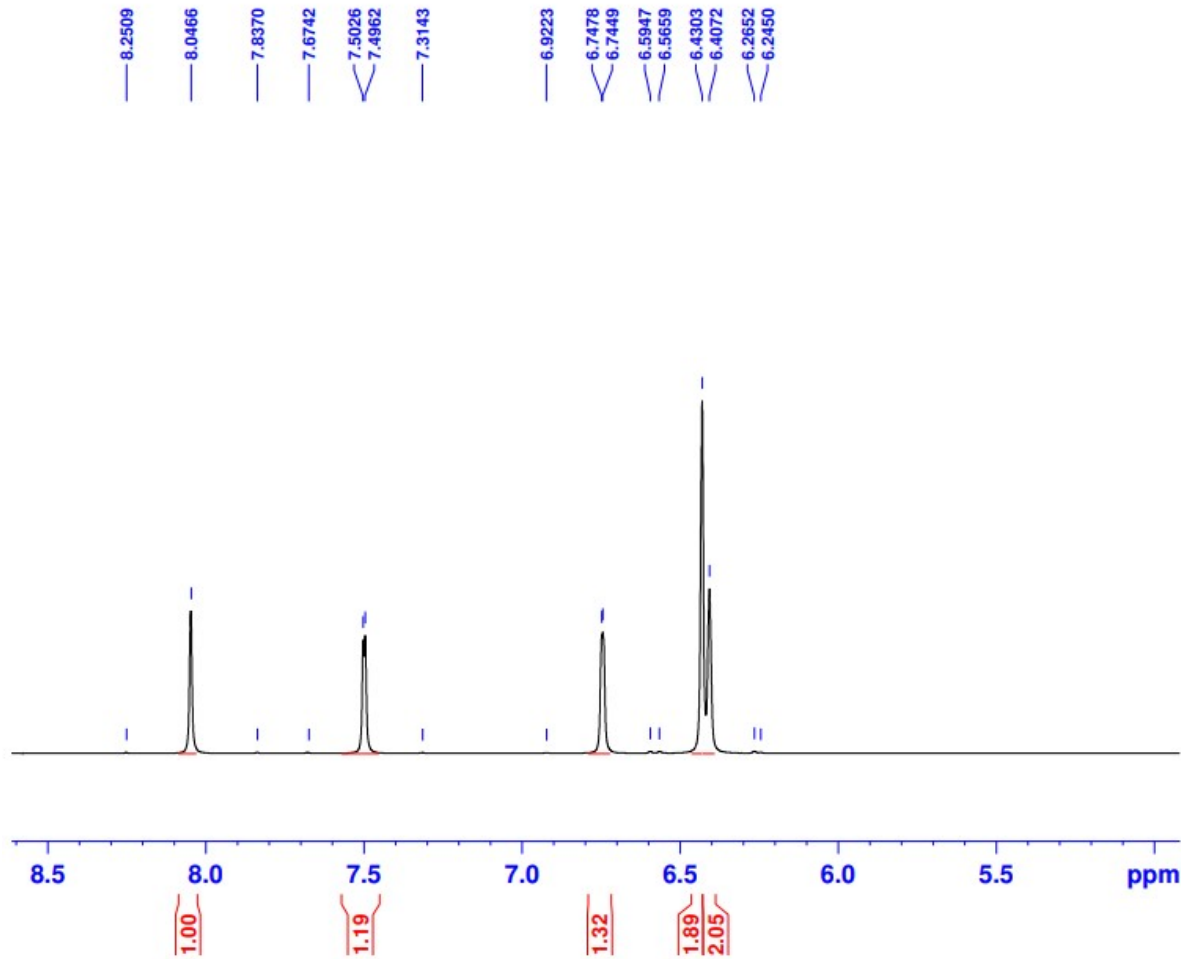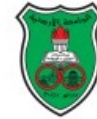

The University of Jordan  
Faculty of Science  
Department of Chemistry

Instrument Model:  
Bruker 500 MHz-Avance III

Operator: Rola Hassouneh  
nmr500@ju.edu.jo

Current Data Parameters  
NAME 19feb15jalal  
EXPNO 2411  
PROCNO 1

F2 - Acquisition Parameters  
Date\_ 20190225  
Time 13.31  
INSTRUM spect  
PROBHD 5 mm PABBO BB/  
PULPROG zg  
TD 65536  
SOLVENT DMSO  
NS 4  
DS 0  
SWH 10000.000 Hz  
FIDRES 0.152588 Hz  
AQ 3.2767999 sec  
RG 43.6  
DW 50.000 usec  
DE 6.50 usec  
TE 298.0 K  
D1 2.00000000 sec  
TD0 1

===== CHANNEL f1 =====  
SF01 500.1332736 MHz  
NUC1 1H  
P1 10.60 usec  
PLW1 17.39999962 W

F2 - Processing parameters  
SI 131072  
SF 500.1300270 MHz  
WDW EM  
SSB 0  
LB 1.00 Hz  
GB 0  
PC 1.00

B4

F2Dmph  
NMR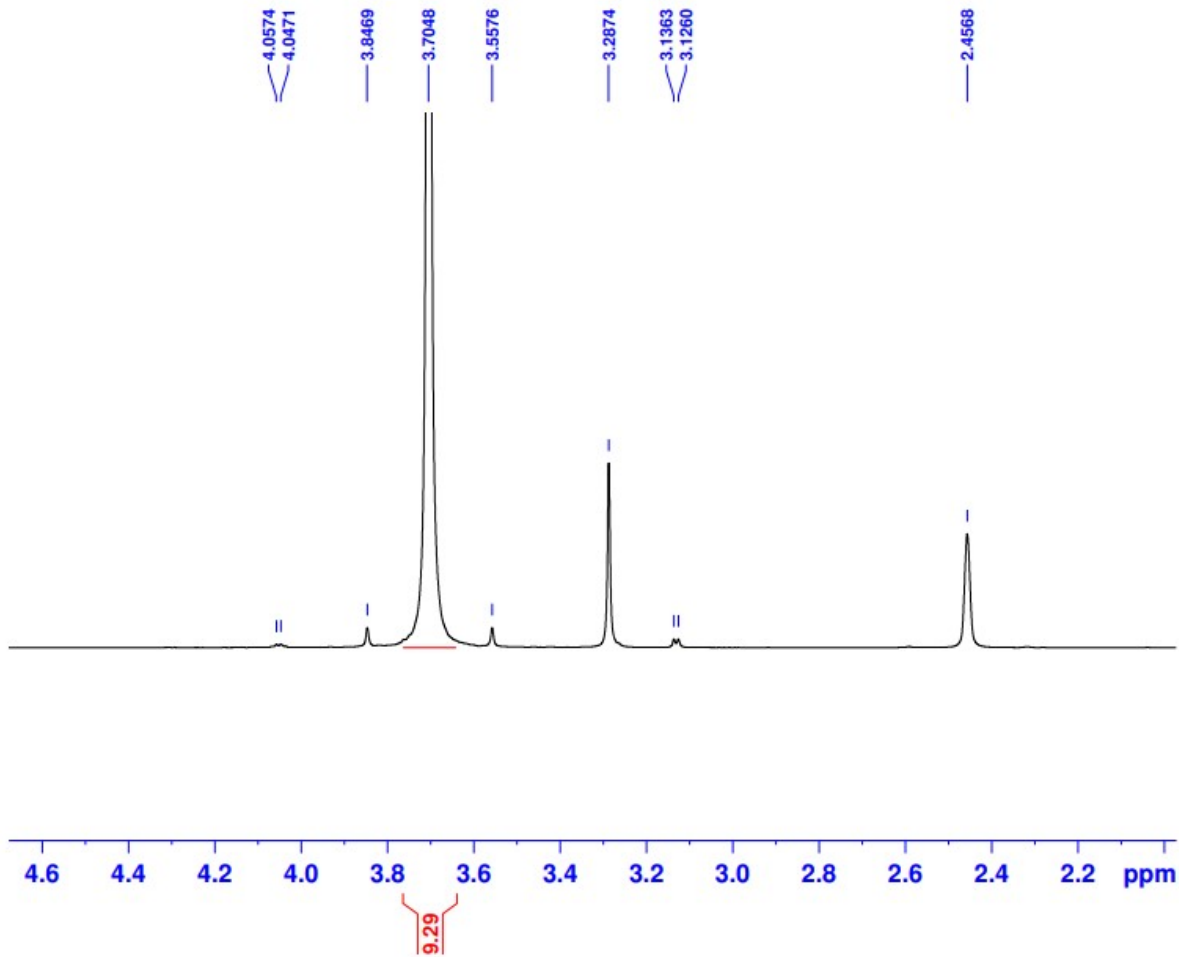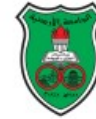

The University of Jordan  
Faculty of Science  
Department of Chemistry

Instrument Model:  
Bruker 500 MHz-Avance III

Operator: Rola Hassouneh  
nmr500@ju.edu.jo

Current Data Parameters  
NAME 19feb15jalal  
EXPNO 2411  
PROCNO 1

F2 - Acquisition Parameters  
Date\_ 20190225  
Time 13.31  
INSTRUM spect  
PROBHD 5 mm PABBO BB/  
PULPROG zg  
TD 65536  
SOLVENT DMSO  
NS 4  
DS 0  
SWH 10000.000 Hz  
FIDRES 0.152588 Hz  
AQ 3.2767999 sec  
RG 43.6  
DW 50.000 usec  
DE 6.50 usec  
TE 298.0 K  
D1 2.00000000 sec  
TD0 1

===== CHANNEL f1 =====  
SFO1 500.1332736 MHz  
NUC1 1H  
P1 10.60 usec  
PLW1 17.39999962 W

F2 - Processing parameters  
SI 131072  
SF 500.1300270 MHz  
WDW EM  
SSB 0  
LB 1.00 Hz  
GB 0  
PC 1.00

B4

F2Dmph  
C13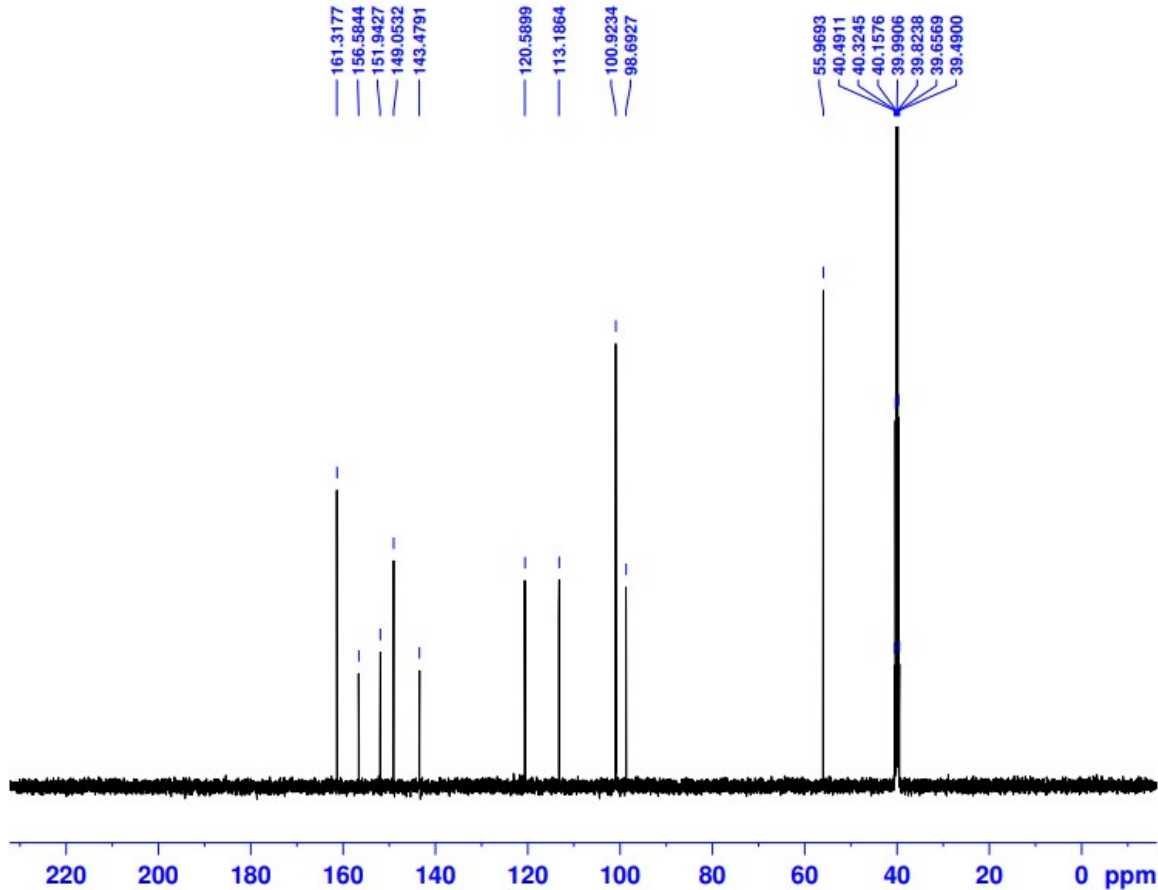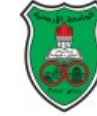

The University of Jordan  
Faculty of Science  
Department of Chemistry

Instrument Model:  
Bruker 500 MHz-Avance III

Operator: Rola Hassouneh  
nmr500@ju.edu.jo

Current Data Parameters  
NAME 19Feb15jalal  
EXPNO 2412  
PROCNO 1

F2 - Acquisition Parameters  
Date\_ 20190225  
Time 13.32  
INSTRUM spect  
PROBHD 5 mm PABBO BB/  
PULPROG zgpg30  
TD 65536  
SOLVENT DMSO  
NS 38  
DS 4  
SWH 31250.000 Hz  
FIDRES 0.476837 Hz  
AQ 1.0485760 sec  
RG 202.06  
DW 16.000 usec  
DE 6.50 usec  
TE 298.3 K  
D1 2.00000000 sec  
D11 0.03000000 sec  
TD0 1

===== CHANNEL f1 =====  
SFO1 125.7713681 MHz  
NUC1 13C  
P1 9.80 usec  
PLW1 93.32499695 W

===== CHANNEL f2 =====  
SFO2 500.1320005 MHz  
NUC2 1H  
CPDPRG[2] waltz16  
PCPD2 80.00 usec  
PLW2 17.37800026 W  
PLW12 0.36307999 W  
PLW13 0.22982000 W

F2 - Processing parameters  
SI 32768  
SF 125.7577890 MHz  
WDW EM  
SSB 0  
LB 1.00 Hz  
GB 0  
PC 1.50

B5

F2BuOH  
NMR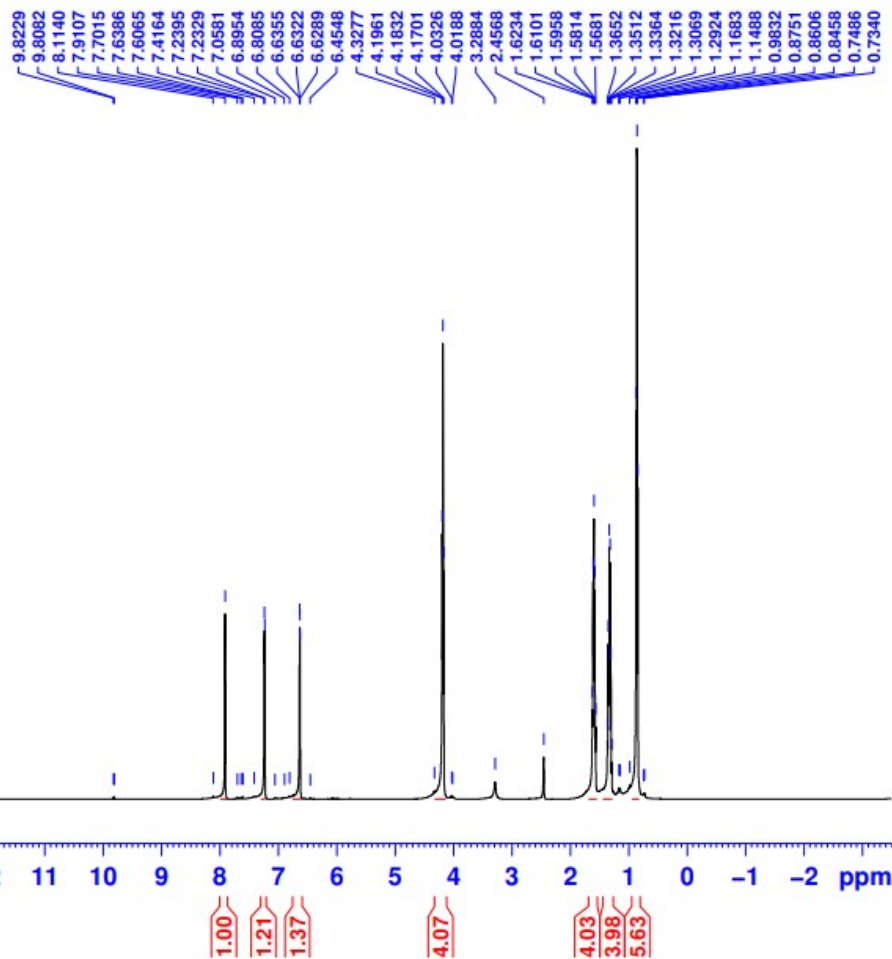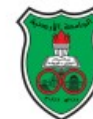

The University of Jordan  
Faculty of Science  
Department of Chemistry

Instrument Model:  
Bruker 500 MHz-Avance III

Operator: Rola Hassouneh  
nmr500@ju.edu.jo

Current Data Parameters  
NAME 19feb15jalal  
EXPNO 2421  
PROCNO 1

F2 - Acquisition Parameters  
Date\_ 20190225  
Time 13.37  
INSTRUM spect  
PROBHD 5 mm PABBO BB/  
PULPROG zg  
TD 65536  
SOLVENT DMSO  
NS 4  
DS 0  
SWH 10000.000 Hz  
FIDRES 0.152588 Hz  
AQ 3.2767999 sec  
RG 17.8  
DW 50.000 usec  
DE 6.50 usec  
TE 298.0 K  
D1 2.00000000 sec  
TD0 1

===== CHANNEL f1 =====  
SFO1 500.1332736 MHz  
NUC1 1H  
P1 10.60 usec  
PLW1 17.39999962 W

F2 - Processing parameters  
SI 131072  
SF 500.1300270 MHz  
WDW EM  
SSB 0  
LB 1.00 Hz  
GB 0  
PC 1.00

B5

F2BuOH  
NMR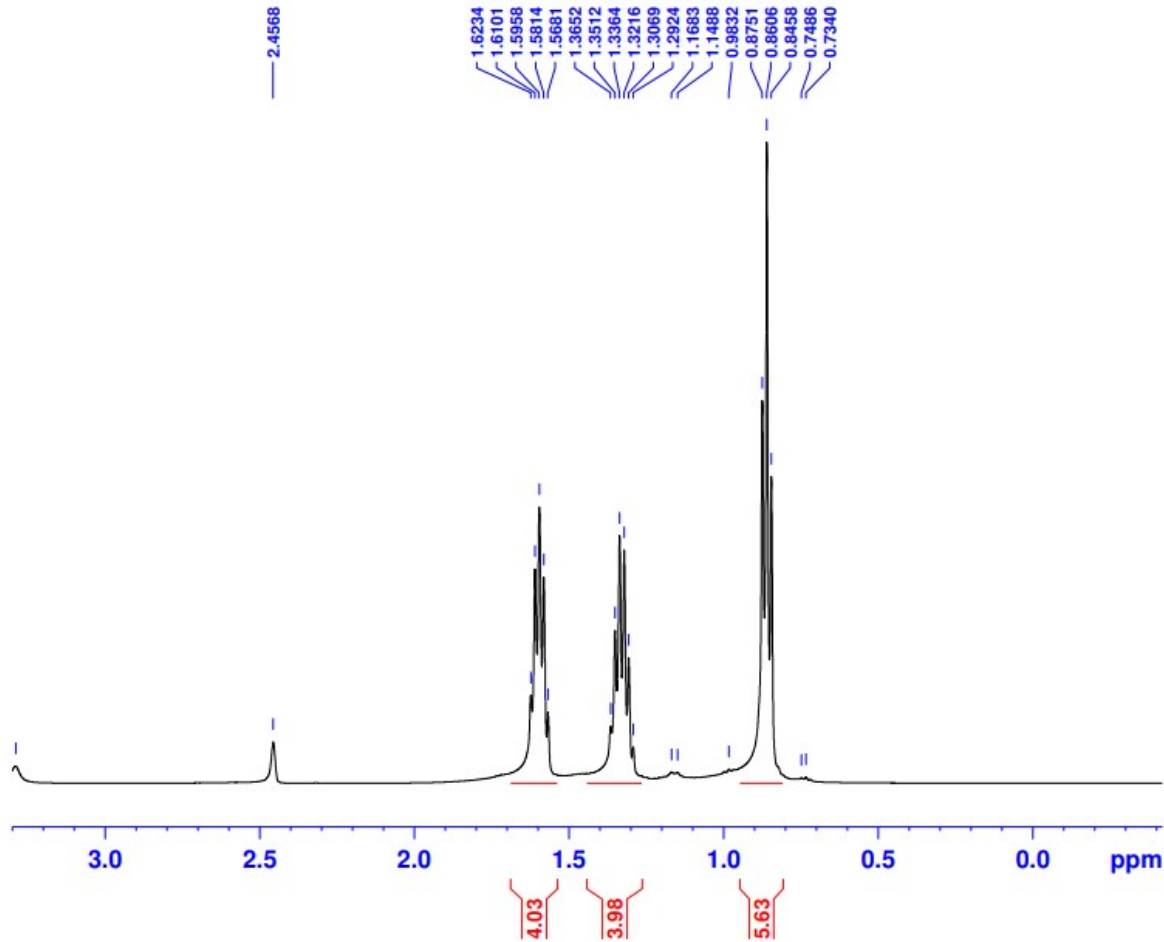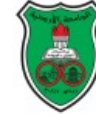

The University of Jordan  
Faculty of Science  
Department of Chemistry

Instrument Model:  
Bruker 500 MHz-Avance III

Operator: Rola Hassouneh  
nrm500@ju.edu.jo

Current Data Parameters  
NAME 19feb15jalal  
EXPNO 2421  
PROCNO 1

F2 - Acquisition Parameters  
Date\_ 20190225  
Time 13.37  
INSTRUM spect  
PROBHD 5 mm PABBO BB/  
PULPROG zg  
TD 65536  
SOLVENT DMSO  
NS 4  
DS 0  
SWH 10000.000 Hz  
FIDRES 0.152588 Hz  
AQ 3.2767999 sec  
RG 17.8  
DW 50.000 usec  
DE 6.50 usec  
TE 298.0 K  
D1 2.00000000 sec  
TD0 1

===== CHANNEL f1 =====  
SFO1 500.1332736 MHz  
NUC1 1H  
P1 10.60 usec  
PLW1 17.39999962 W

F2 - Processing parameters  
SI 131072  
SF 500.1300270 MHz  
WDW EM  
SSB 0  
LB 1.00 Hz  
GB 0  
PC 1.00

B5

F2BuOH  
NMR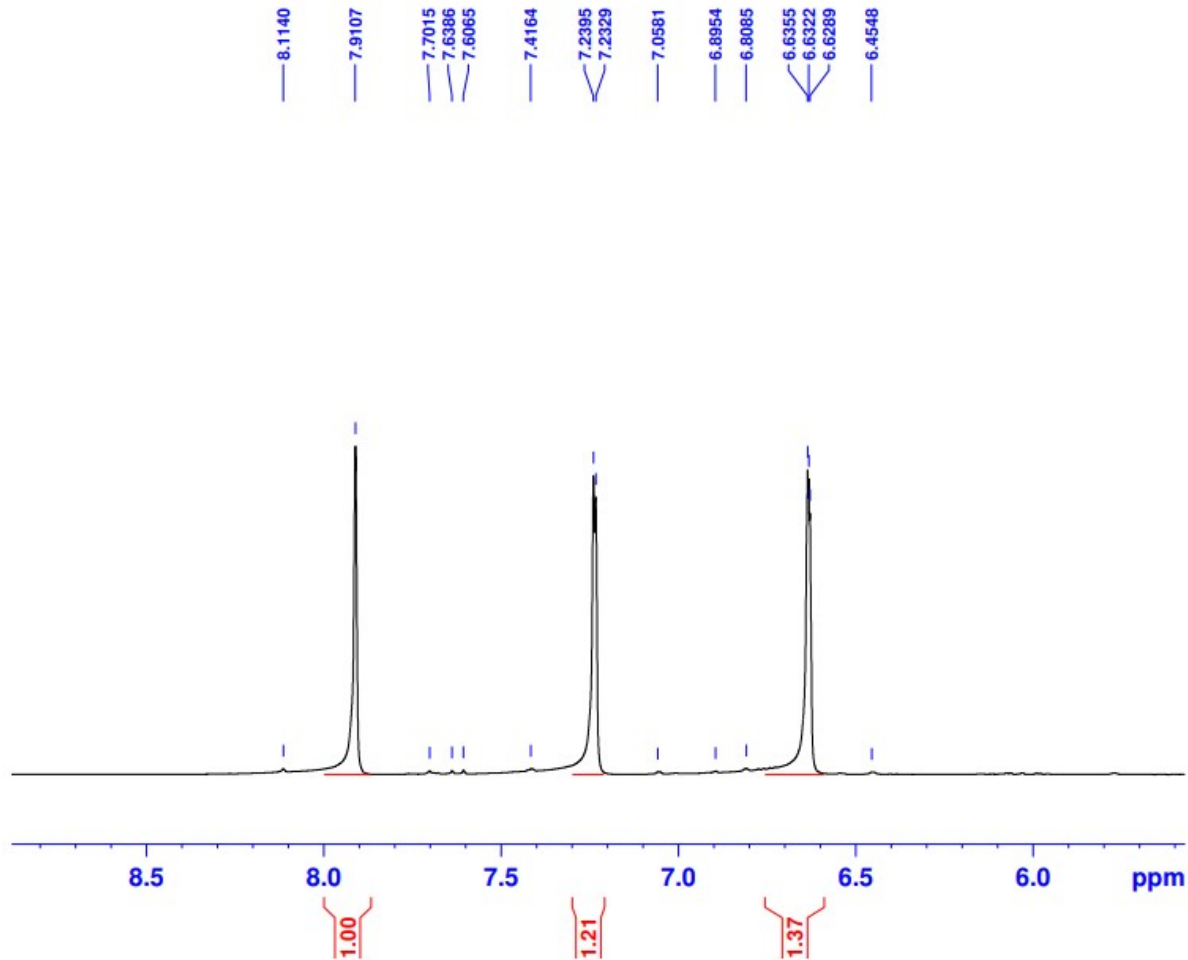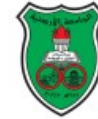

The University of Jordan  
Faculty of Science  
Department of Chemistry

Instrument Model:  
Bruker 500 MHz-Avance III

Operator: Rola Hassouneh  
nmr500@ju.edu.jo

Current Data Parameters  
NAME 19feb15jalal  
EXPNO 2421  
PROCNO 1

F2 - Acquisition Parameters  
Date\_ 20190225  
Time 13.37  
INSTRUM spect  
PROBHD 5 mm PABBO BB/  
PULPROG zg  
TD 65536  
SOLVENT DMSO  
NS 4  
DS 0  
SWH 10000.000 Hz  
FIDRES 0.152588 Hz  
AQ 3.2767999 sec  
RG 17.8  
DW 50.000 usec  
DE 6.50 usec  
TE 298.0 K  
D1 2.00000000 sec  
TD0 1

==== CHANNEL f1 =====  
SFO1 500.1332736 MHz  
NUC1 1H  
P1 10.60 usec  
PLW1 17.39999962 W

F2 - Processing parameters  
SI 131072  
SF 500.1300270 MHz  
WDW EM  
SSB 0  
LB 1.00 Hz  
GB 0  
PC 1.00



B5

F2BuOH  
C13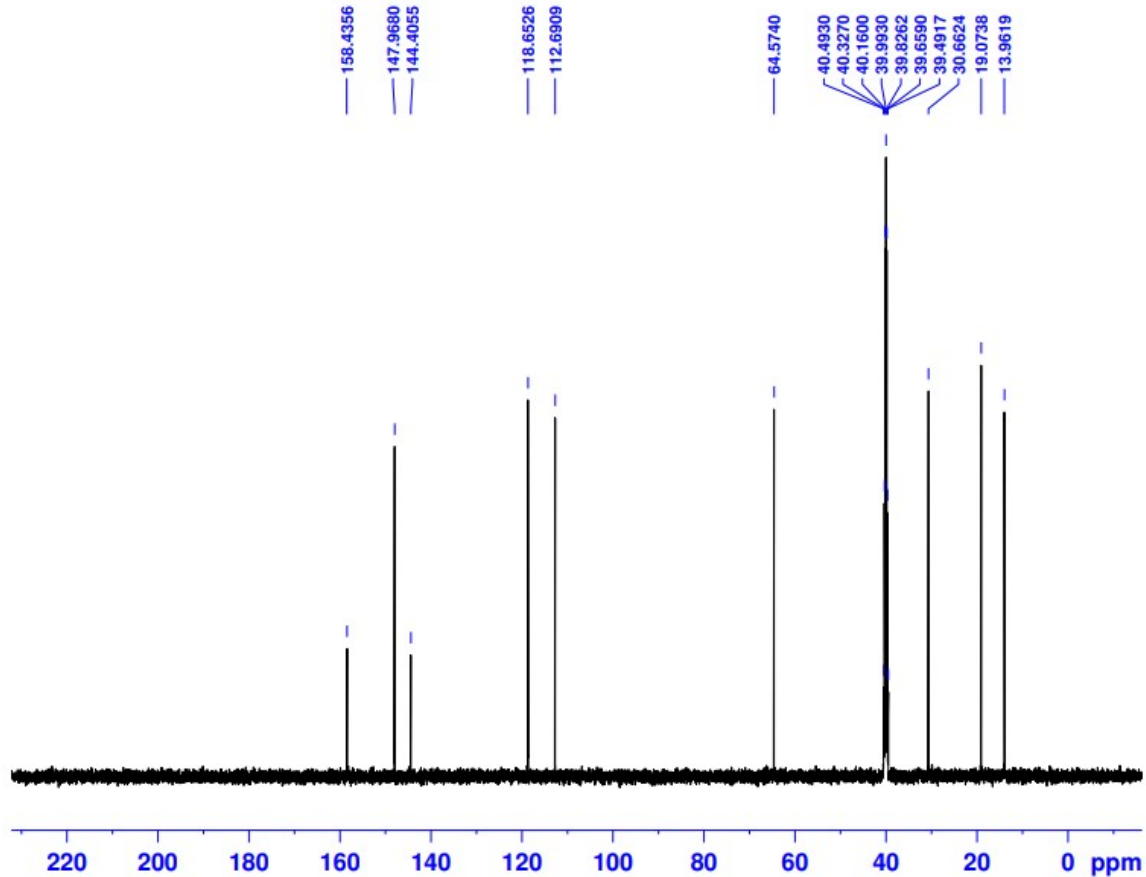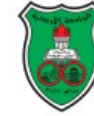

The University of Jordan  
Faculty of Science  
Department of Chemistry

Instrument Model:  
Bruker 500 MHz-Avance III

Operator: Rola Hassouneh  
nmr500@ju.edu.jo

Current Data Parameters  
NAME 19feb15jalal  
EXPNO 2422  
PROCNO 1

F2 - Acquisition Parameters  
Date\_ 20190225  
Time 13.38  
INSTRUM spect  
PROBHD 5 mm PABBO BB/  
PULPROG zgpg30  
TD 65536  
SOLVENT DMSO  
NS 42  
DS 4  
SWH 31250.000 Hz  
FIDRES 0.476837 Hz  
AQ 1.0485760 sec  
RG 202.06  
DW 16.000 usec  
DE 6.50 usec  
TE 298.0 K  
D1 2.00000000 sec  
D11 0.03000000 sec  
TD0 1

===== CHANNEL f1 =====  
SFO1 125.7713681 MHz  
NUC1 13C  
P1 9.80 usec  
PLW1 93.32499695 W

===== CHANNEL f2 =====  
SFO2 500.1320005 MHz  
NUC2 1H  
CPDPRG[2] waltz16  
PCPD2 80.00 usec  
PLW2 17.37800026 W  
PLW12 0.36307999 W  
PLW13 0.22982000 W

F2 - Processing parameters  
SI 32768  
SF 125.7577890 MHz  
WDW EM  
SSB 0  
LB 1.00 Hz  
GB 0  
PC 1.50

B6

F2CLPH  
NMR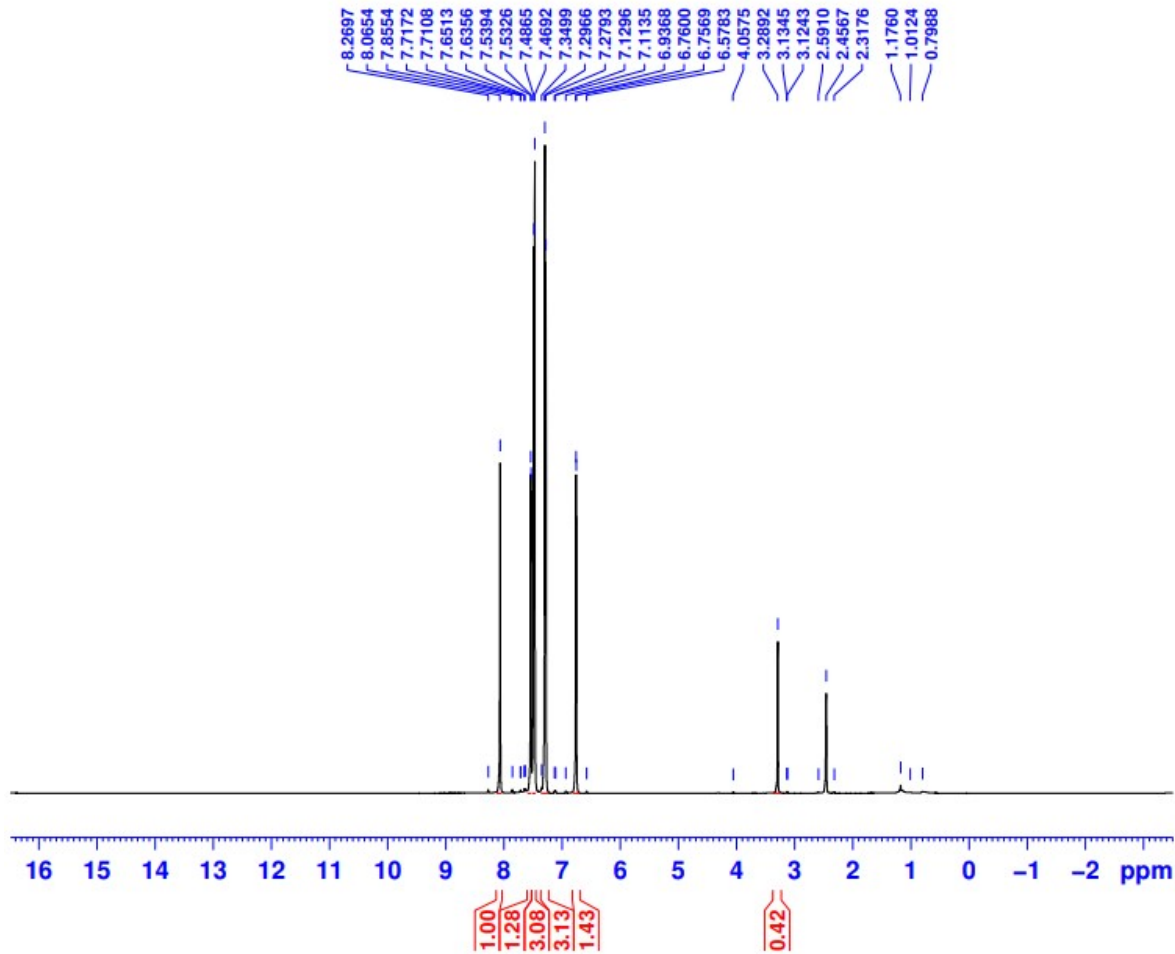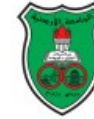

The University of Jordan  
Faculty of Science  
Department of Chemistry

Instrument Model:  
Bruker 500 MHz-Avance III

Operator: Rola Hassouneh  
nmr500@ju.edu.jo

Current Data Parameters  
NAME 19feb15jalal  
EXPNO 2361  
PROCNO 1

F2 - Acquisition Parameters  
Date\_ 20190225  
Time 13.11  
INSTRUM spect  
PROBHD 5 mm PABBO BB/  
PULPROG zg  
TD 65536  
SOLVENT DMSO  
NS 4  
DS 0  
SWH 10000.000 Hz  
FIDRES 0.152588 Hz  
AQ 3.2767999 sec  
RG 56.03  
DW 50.000 usec  
DE 6.50 usec  
TE 298.0 K  
D1 2.00000000 sec  
TD0 1

===== CHANNEL f1 =====  
SF01 500.1332736 MHz  
NUC1 1H  
P1 10.60 usec  
PLW1 17.39999962 W

F2 - Processing parameters  
SI 131072  
SF 500.1300270 MHz  
WDW EM  
SSB 0  
LB 1.00 Hz  
GB 0  
PC 1.00

B6

F2CLPH  
NMR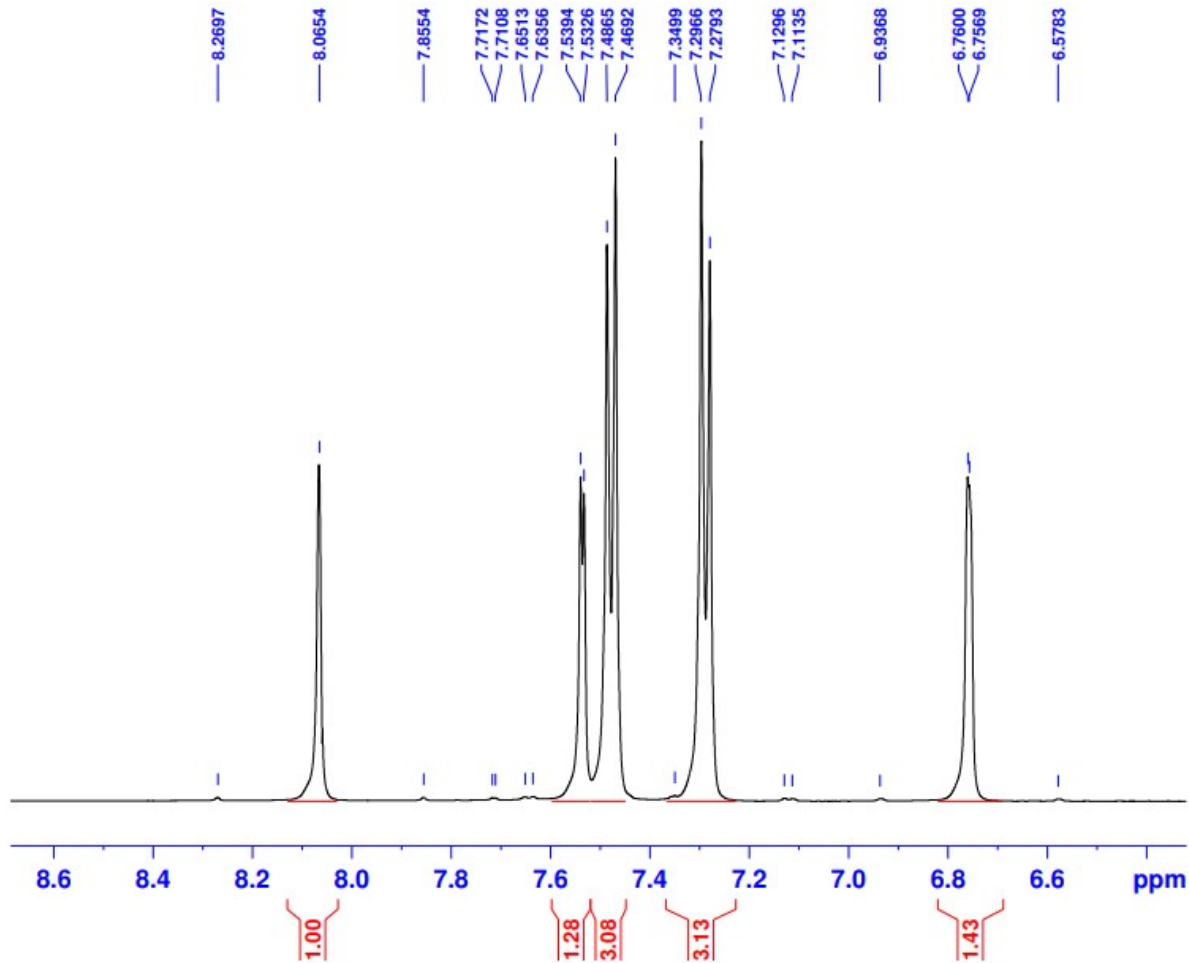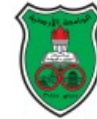

The University of Jordan  
Faculty of Science  
Department of Chemistry

Instrument Model:  
Bruker 500 MHz-Avance III

Operator: Rola Hassouneh  
nmr500@ju.edu.jo

Current Data Parameters  
NAME 19febl5jalal  
EXPNO 2361  
PROCNO 1

F2 - Acquisition Parameters  
Date\_ 20190225  
Time 13.11  
INSTRUM spect  
PROBHD 5 mm PABBO BB/  
PULPROG zg  
TD 65536  
SOLVENT DMSO  
NS 4  
DS 0  
SWH 10000.000 Hz  
FIDRES 0.152588 Hz  
AQ 3.2767999 sec  
RG 56.03  
DW 50.000 usec  
DE 6.50 usec  
TE 298.0 K  
D1 2.00000000 sec  
TD0 1

===== CHANNEL f1 =====  
SFO1 500.1332736 MHz  
NUC1 1H  
P1 10.60 usec  
PLW1 17.39999962 W

F2 - Processing parameters  
SI 131072  
SF 500.1300270 MHz  
WDW EM  
SSB 0  
LB 1.00 Hz  
GB 0  
PC 1.00

B6

F2CLPH  
C13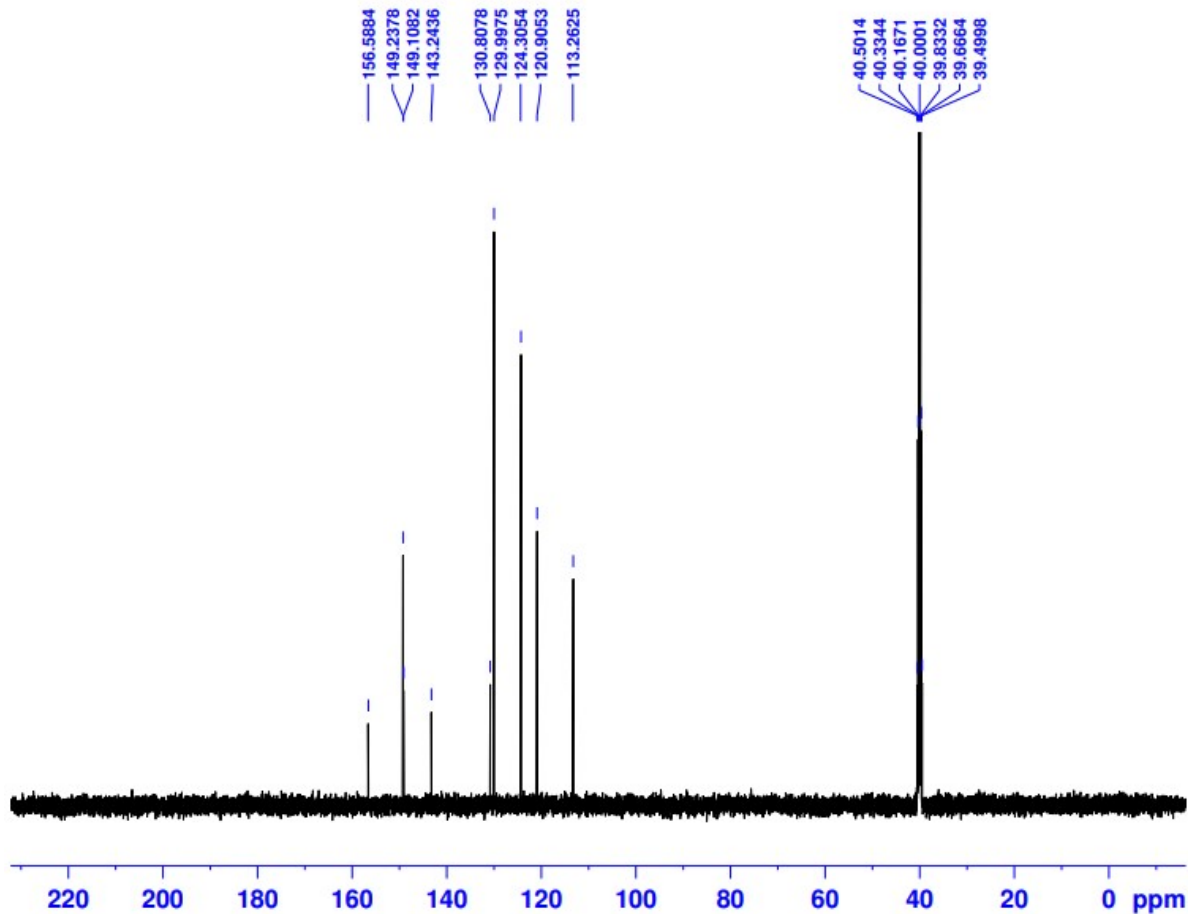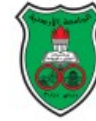

The University of Jordan  
Faculty of Science  
Department of Chemistry

Instrument Model:  
Bruker 500 MHz-Avance III

Operator: Rola Hassouneh  
nmr500@ju.edu.jo

Current Data Parameters  
NAME 19feb15jalal  
EXPNO 2362  
PROCNO 1

F2 - Acquisition Parameters  
Date\_ 20190225  
Time 13.13  
INSTRUM spect  
PROBHD 5 mm PABBO BB/  
PULPROG zgpg30  
TD 65536  
SOLVENT DMSO  
NS 23  
DS 4  
SWH 31250.000 Hz  
FIDRES 0.476837 Hz  
AQ 1.0485760 sec  
RG 202.06  
DW 16.000 usec  
DE 6.50 usec  
TE 298.1 K  
D1 2.00000000 sec  
D11 0.03000000 sec  
TD0 1

===== CHANNEL f1 =====  
SFO1 125.7713681 MHz  
NUC1 13C  
P1 9.80 usec  
PLW1 93.32499695 W

===== CHANNEL f2 =====  
SFO2 500.1320005 MHz  
NUC2 1H  
CPDPRG2 waltz16  
PCPD2 80.00 usec  
PLW2 17.37800026 W  
PLW12 0.36307999 W  
PLW13 0.22982000 W

F2 - Processing parameters  
SI 32768  
SF 125.7577890 MHz  
WDW EM  
SSB 0  
LB 1.00 Hz  
GB 0  
PC 1.50

B7

F2Cr  
NMR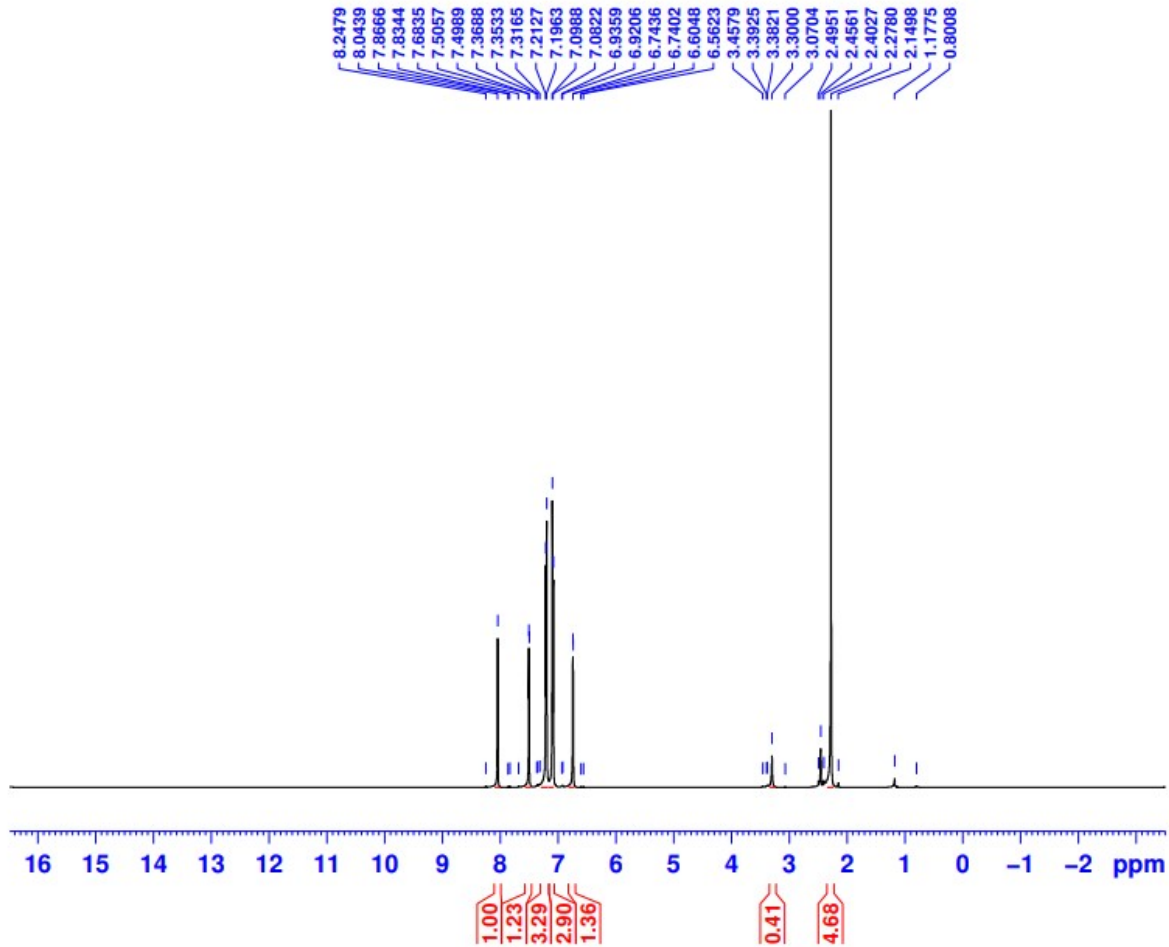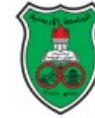

The University of Jordan  
Faculty of Science  
Department of Chemistry

Instrument Model:  
Bruker 500 MHz-Avance III

Operator: Rola Hassouneh  
nmr500@ju.edu.jo

Current Data Parameters  
NAME 19feb15jalal  
EXPNO 2381  
PROCNO 1

F2 - Acquisition Parameters  
Date\_ 20190225  
Time 13.16  
INSTRUM spect  
PROBHD 5 mm PABBO BB/  
PULPROG zg  
TD 65536  
SOLVENT DMSO  
NS 4  
DS 0  
SWH 10000.000 Hz  
FIDRES 0.152588 Hz  
AQ 3.2767999 sec  
RG 56.03  
DW 50.000 usec  
DE 6.50 usec  
TE 298.0 K  
D1 2.00000000 sec  
TD0 1

==== CHANNEL f1 =====  
SFO1 500.1332736 MHz  
NUC1 1H  
P1 10.60 usec  
PLW1 17.39999962 W

F2 - Processing parameters  
SI 131072  
SF 500.1300270 MHz  
WDW EM  
SSB 0  
LB 1.00 Hz  
GB 0  
PC 1.00

B7

F2Cr  
NMR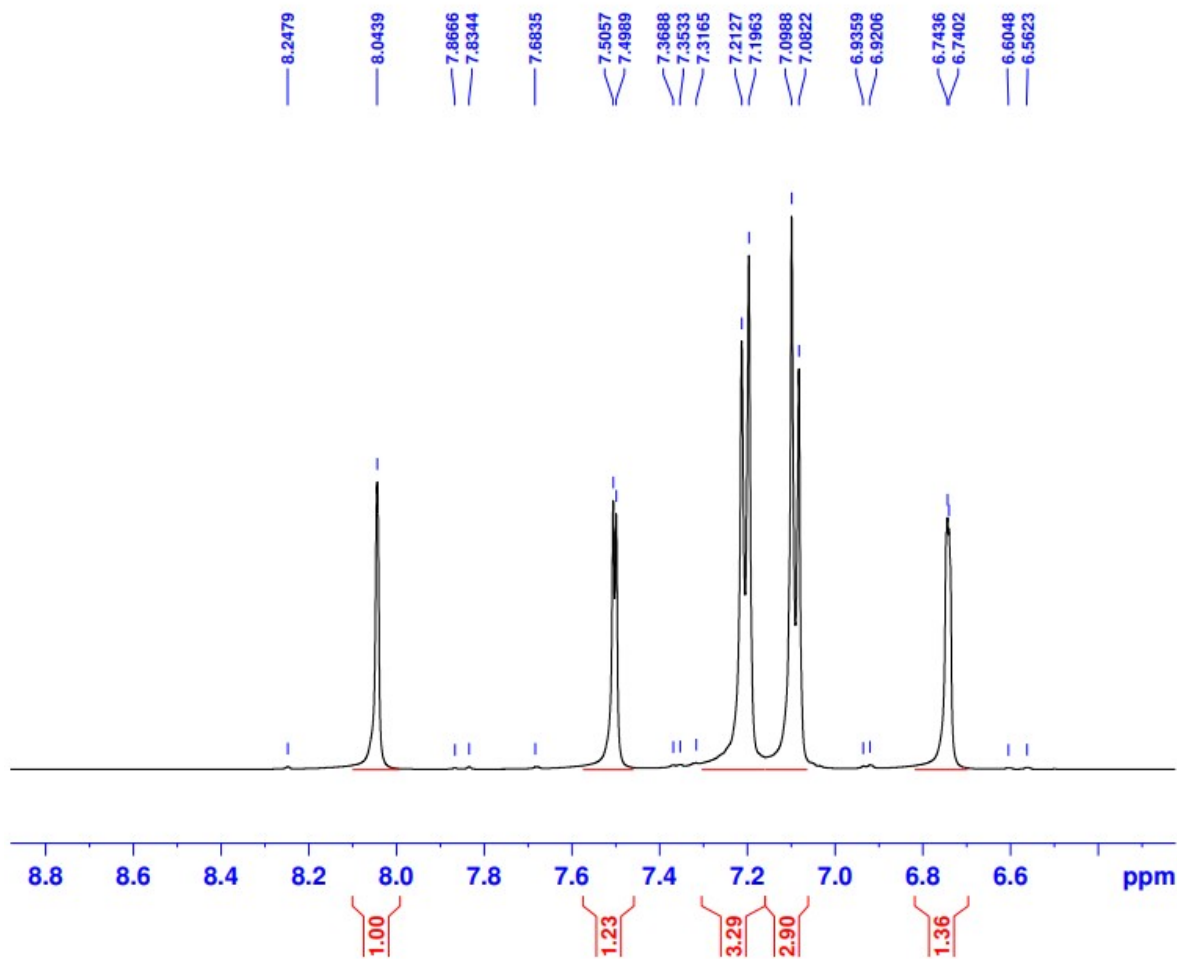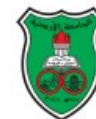

The University of Jordan  
Faculty of Science  
Department of Chemistry

Instrument Model:  
Bruker 500 MHz-Avance III

Operator: Rola Hassouneh  
nmr500@ju.edu.jo

Current Data Parameters  
NAME 19feb15jalal  
EXPNO 2381  
PROCNO 1

F2 - Acquisition Parameters  
Date\_ 20190225  
Time 13.16  
INSTRUM spect  
PROBHD 5 mm PABBO BB/  
PULPROG zg  
TD 65536  
SOLVENT DMSO  
NS 4  
DS 0  
SWH 10000.000 Hz  
FIDRES 0.152588 Hz  
AQ 3.2767999 sec  
RG 56.03  
DW 50.000 usec  
DE 6.50 usec  
TE 298.0 K  
D1 2.00000000 sec  
TD0 1

===== CHANNEL f1 =====  
SF01 500.1332736 MHz  
NUC1 1H  
P1 10.60 usec  
PLW1 17.39999962 W

F2 - Processing parameters  
SI 131072  
SF 500.1300270 MHz  
WDW EM  
SSB 0  
LB 1.00 Hz  
GB 0  
PC 1.00

B7

F2Cr  
NMR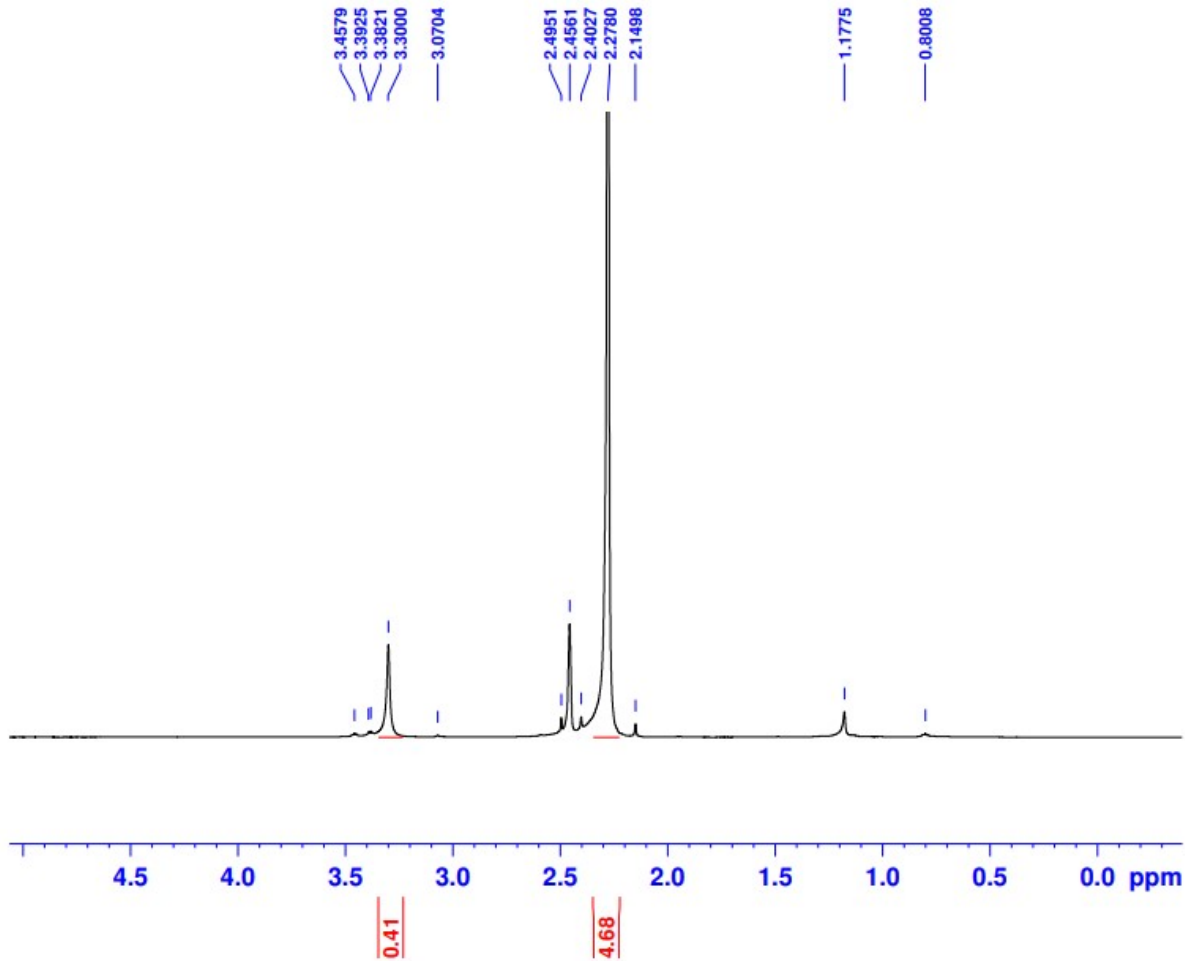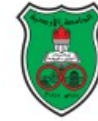

The University of Jordan  
Faculty of Science  
Department of Chemistry

Instrument Model:  
Bruker 500 MHz-Avance III

Operator: Rola Hassouneh  
nmr500@ju.edu.jo

Current Data Parameters  
NAME 19feb15jalal  
EXPNO 2381  
PROCNO 1

F2 - Acquisition Parameters  
Date\_ 20190225  
Time 13.16  
INSTRUM spect  
PROBHD 5 mm PABBO BB/  
PULPROG zg  
TD 65536  
SOLVENT DMSO  
NS 4  
DS 0  
SWH 10000.000 Hz  
FIDRES 0.152588 Hz  
AQ 3.2767999 sec  
RG 56.03  
DW 50.000 usec  
DE 6.50 usec  
TE 298.0 K  
D1 2.00000000 sec  
TD0 1

===== CHANNEL f1 =====  
SF01 500.1332736 MHz  
NUC1 1H  
P1 10.60 usec  
PLW1 17.39999962 W

F2 - Processing parameters  
SI 131072  
SF 500.1300270 MHz  
WDW EM  
SSB 0  
LB 1.00 Hz  
GB 0  
PC 1.00

B7

F2Cr  
C13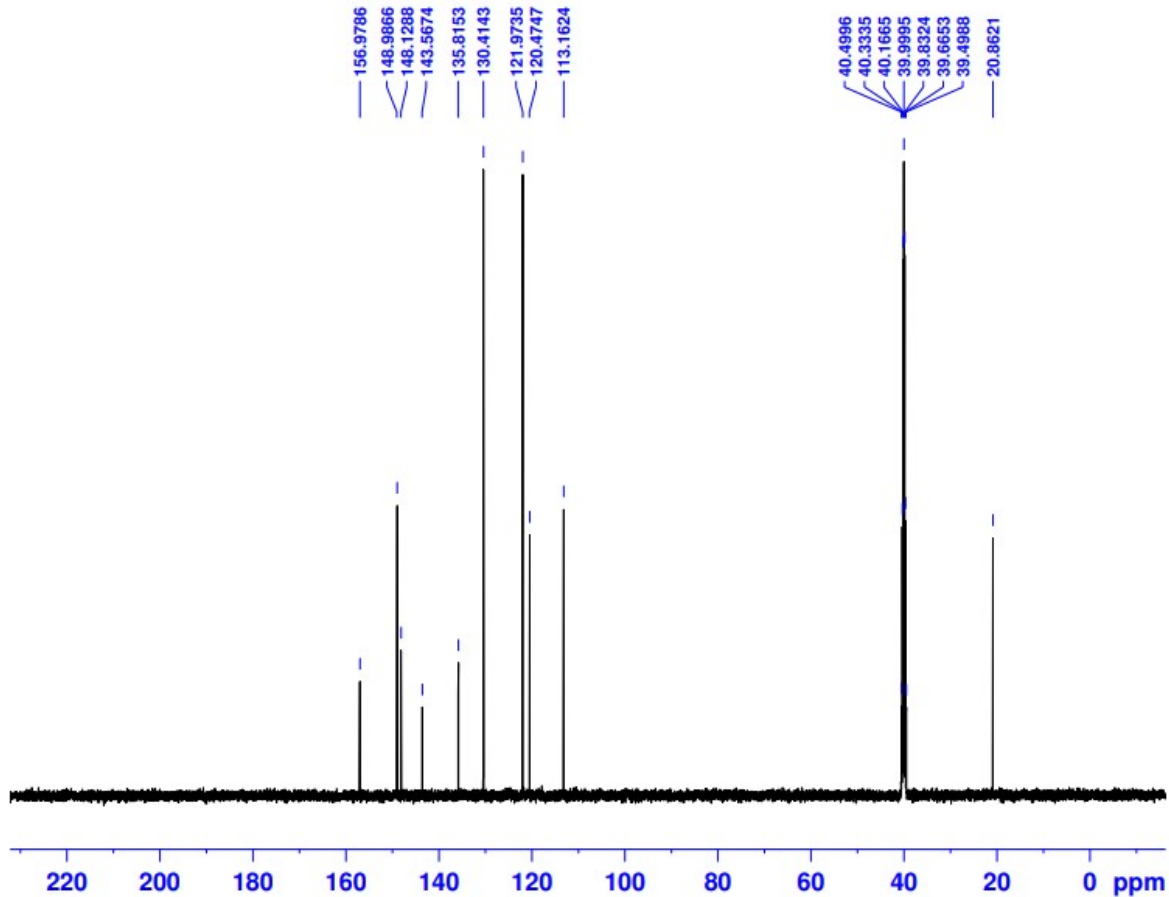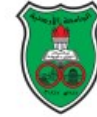

The University of Jordan  
Faculty of Science  
Department of Chemistry

Instrument Model:  
Bruker 500 MHz-Avance III

Operator: Rola Hassouneh  
nmr500@ju.edu.jo

Current Data Parameters  
NAME 19feb15jalal  
EXPNO 2382  
PROCNO 1

F2 - Acquisition Parameters  
Date\_ 20190225  
Time 13.19  
INSTRUM spect  
PROBHD 5 mm PABBO BB/  
PULPROG zgpg30  
TD 65536  
SOLVENT DMSO  
NS 47  
DS 4  
SWH 31250.000 Hz  
FIDRES 0.476837 Hz  
AQ 1.0485760 sec  
RG 202.06  
DW 16.000 usec  
DE 6.50 usec  
TE 298.0 K  
D1 2.00000000 sec  
D11 0.03000000 sec  
TD0 1

===== CHANNEL f1 =====  
SFO1 125.7713681 MHz  
NUC1 13C  
P1 9.80 usec  
PLW1 93.32499695 W

===== CHANNEL f2 =====  
SFO2 500.1320005 MHz  
NUC2 1H  
CPDPRG[2] waltz16  
PCPD2 80.00 usec  
PLW2 17.37800026 W  
PLW12 0.36307999 W  
PLW13 0.22982000 W

F2 - Processing parameters  
SI 32768  
SF 125.7577890 MHz  
WDW EM  
SSB 0  
LB 1.00 Hz  
GB 0  
PC 1.50



B7

F2Cr  
C13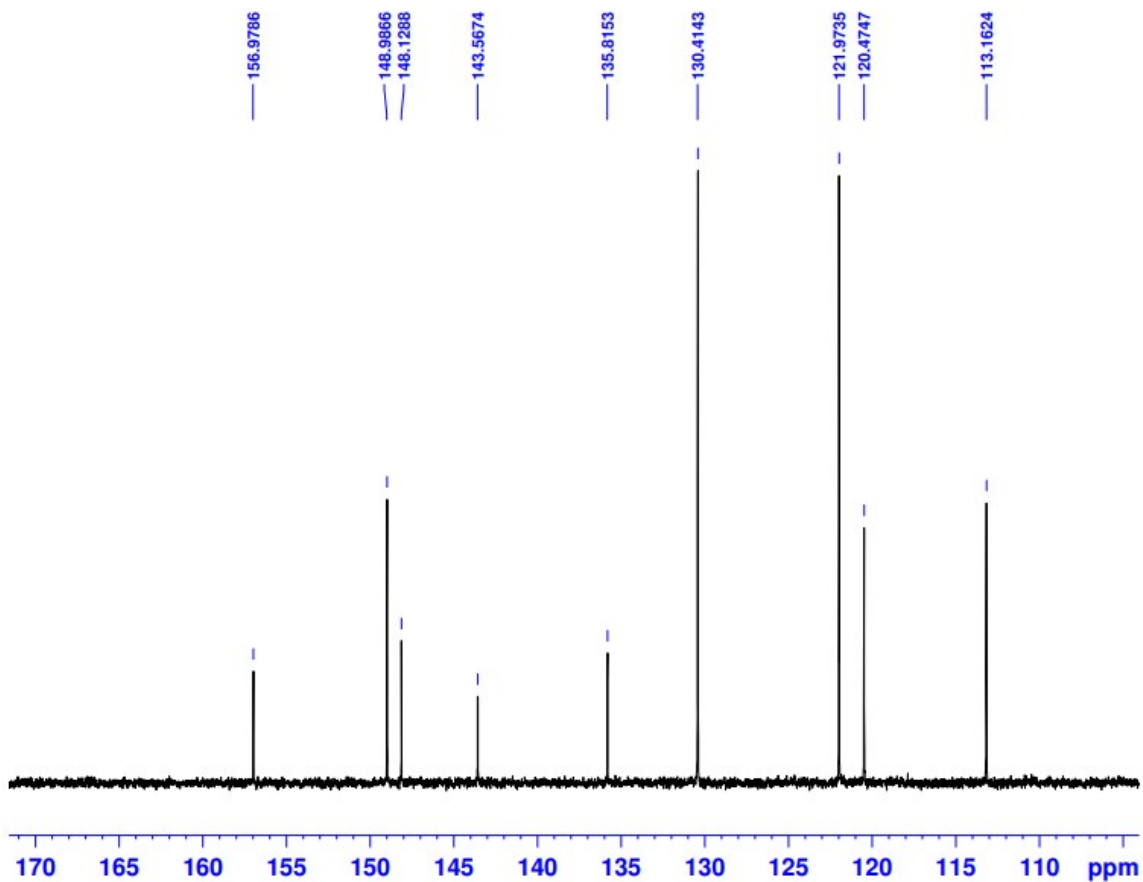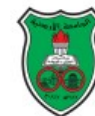

The University of Jordan  
Faculty of Science  
Department of Chemistry

Instrument Model:  
Bruker 500 MHz-Avance III

Operator: Rola Hassouneh  
nmr500@ju.edu.jo

Current Data Parameters  
NAME 19feb15jalal  
EXPNO 2382  
PROCNO 1

F2 - Acquisition Parameters  
Date\_ 20190225  
Time 13.19  
INSTRUM spect  
PROBHD 5 mm PABBO BB/  
PULPROG zgpg30  
TD 65536  
SOLVENT DMSO  
NS 47  
DS 4  
SWH 31250.000 Hz  
FIDRES 0.476837 Hz  
AQ 1.0485760 sec  
RG 202.06  
DW 16.000 usec  
DE 6.50 usec  
TE 298.0 K  
D1 2.00000000 sec  
D11 0.03000000 sec  
TD0 1

===== CHANNEL f1 =====  
SFO1 125.7713681 MHz  
NUC1 13C  
P1 9.80 usec  
PLW1 93.32499695 W

===== CHANNEL f2 =====  
SFO2 500.1320005 MHz  
NUC2 1H  
CPDPRG[2] waltz16  
PCPD2 80.00 usec  
PLW2 17.37800026 W  
PLW12 0.36307999 W  
PLW13 0.22982000 W

F2 - Processing parameters  
SI 32768  
SF 125.7577890 MHz  
WDW EM  
SSB 0  
LB 1.00 Hz  
GB 0  
PC 1.50

## Appendix B

Mass spectra

F4As (C12)

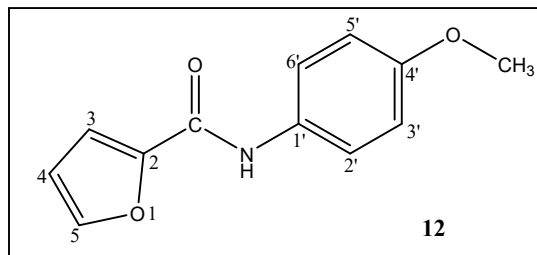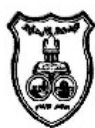

**The University of Jordan**  
**Faculty of science**  
**Department of Chemistry**

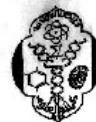

## Mass Spectrum Molecular Formula Report

Analysis Info Acquisition Date 1/15/2018 11:48:43 AM  
 Analysis Name F:\Data\2018\JAN13\AREEJ\_000029.d Operator Bruker\_PC  
 Method ESI\_pos\_20181024 Instrument apex-IV  
 Sample Name F4AS  
 Comment AGN+chclS

## Acquisition Parameter

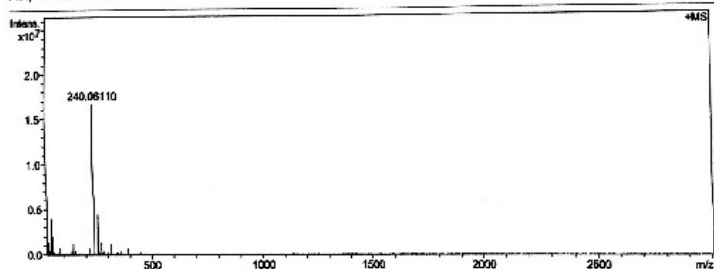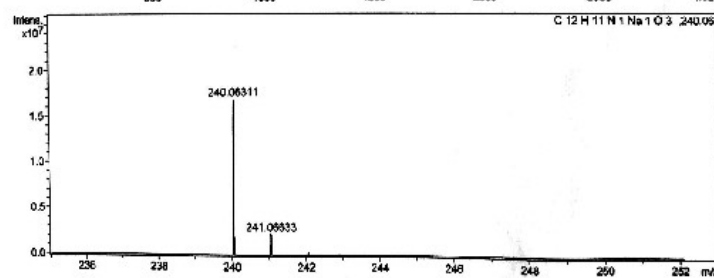

| Sum Formula                                                   | Sigma | m/z       | Err (ppm) | Mean Err (ppm) | Err (mDa) | rdB  | N Rule | e <sup>-</sup> |
|---------------------------------------------------------------|-------|-----------|-----------|----------------|-----------|------|--------|----------------|
| C <sub>12</sub> H <sub>11</sub> N <sub>1</sub> O <sub>3</sub> | 0.092 | 240.06311 | 8.37      | 8.17           | 2.01      | 7.50 | ok     | even           |

Bruker Daltonics DataAnalysis 3.4

printed: 1/15/2018 11:48:21 AM

Page 1 of 1

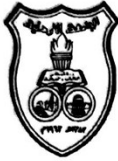

The University of Jordan  
Faculty of science  
Department of Chemistry

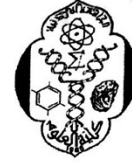

### Mass Spectrum Molecular Formula Report

**Analysis Info**

Analysis Name F:\Data\2019JAN13\AREEJ\_000029.d  
Method ESI\_pos\_20181024  
Sample Name F4AS  
Comment ACN+chcl3

Acquisition Date 1/15/2019 11:46:43 AM

Operator Bruker\_PC  
Instrument apex-IV

**Acquisition Parameter**
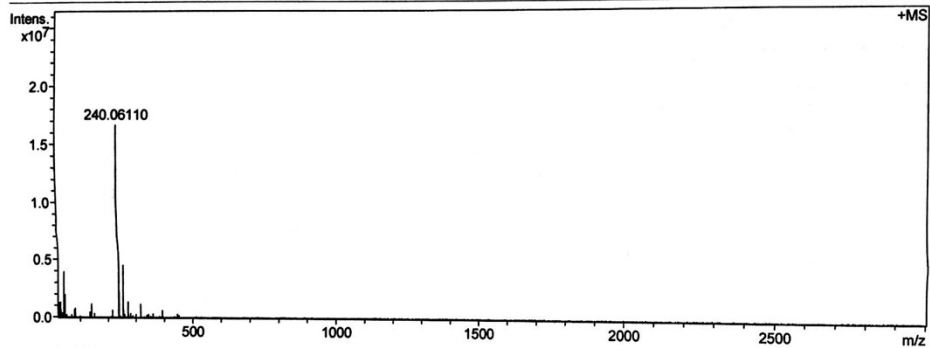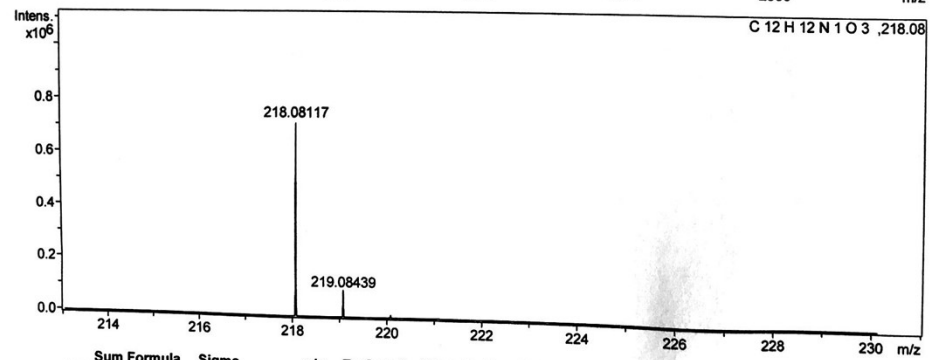

| Sum Formula       | Sigma | m/z       | Err [ppm] | Mean Err [ppm] | Err [mDa] | rdB  | N Rule | e <sup>-</sup> |
|-------------------|-------|-----------|-----------|----------------|-----------|------|--------|----------------|
| C 12 H 12 N 1 O 3 | 0.010 | 218.08117 | 8.72      | 8.06           | 1.90      | 7.50 | ok     | even           |

## Mass Spectrum List Report

**Analysis Info**

Analysis Name F:\Data\2019\JAN13\AREEJ\_000029.d  
 Method ESI\_pos\_20181024  
 Sample Name F4AS  
 Comment ACN+chcl3

Acquisition Date 1/15/2019 11:46:43 AM  
 Operator Bruker\_PC  
 Instrument apex-IV

**Acquisition Parameter**
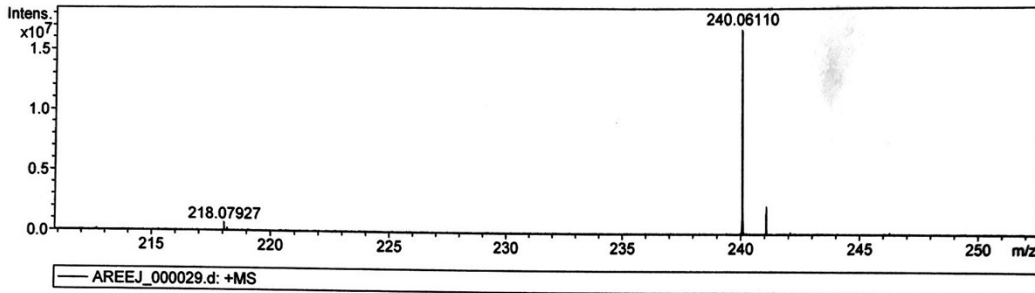

| #  | m/z       | I        | I %   |
|----|-----------|----------|-------|
| 1  | 26.25429  | 1302858  | 7.7   |
| 2  | 30.00496  | 1400276  | 8.3   |
| 3  | 30.35563  | 559375   | 3.3   |
| 4  | 30.58470  | 581072   | 3.4   |
| 5  | 30.72794  | 560416   | 3.3   |
| 6  | 30.80649  | 561995   | 3.3   |
| 7  | 30.86824  | 563195   | 3.3   |
| 8  | 30.92163  | 571071   | 3.4   |
| 9  | 31.02984  | 584816   | 3.5   |
| 10 | 31.10576  | 606216   | 3.6   |
| 11 | 31.14863  | 629470   | 3.7   |
| 12 | 31.15687  | 584529   | 3.5   |
| 13 | 31.18847  | 575271   | 3.4   |
| 14 | 31.31186  | 656621   | 3.9   |
| 15 | 31.50048  | 567100   | 3.4   |
| 16 | 42.00681  | 3985585  | 23.6  |
| 17 | 46.35324  | 2015775  | 11.9  |
| 18 | 82.97911  | 878313   | 5.2   |
| 19 | 82.98098  | 775881   | 4.6   |
| 20 | 142.98987 | 1247417  | 7.4   |
| 21 | 218.07927 | 720905   | 4.3   |
| 22 | 240.04174 | 1339233  | 7.9   |
| 23 | 240.06110 | 16868448 | 100.0 |
| 24 | 240.08055 | 1258463  | 7.5   |
| 25 | 241.06461 | 2340288  | 13.9  |
| 26 | 256.03479 | 4632475  | 27.5  |
| 27 | 257.03856 | 664203   | 3.9   |
| 28 | 274.27146 | 1435566  | 8.5   |
| 29 | 318.29684 | 1252740  | 7.4   |
| 30 | 395.43701 | 728201   | 4.3   |
